# Supplementary material
Source: MDPI journal article supplement (https://www.mdpi.com/1424-8247/14/10/974)

# Synthesis and biological evaluation of (S)-2-(substituted arylmethyl)-1-oxo-1,2,3,4-tetrahydropyrazino[1,2-*a*]indole-3-carboxamide analogs and their synergistic effect against PTEN-deficient MDA-MB-468 cells

Ye-Mi Kwon <sup>1,†</sup>, Sou Hyun Kim <sup>2,†</sup>, Young-Suk Jung <sup>2,\*</sup> and Jae-Hwan Kwak <sup>1,\*</sup>

<sup>1</sup> College of Pharmacy, Kyungsung University, Busan, 48434, Republic of Korea; kym00109@naver.com (Y.-M.K.)

<sup>2</sup> College of Pharmacy, Pusan National University, Busan, 46241, Republic of Korea; souhyun@pusan.ac.kr (S.H.K.)

\* Correspondence: youngjung@pusan.ac.kr (Y.-S.J.); jhkwak@ks.ac.kr (J.-H.K.);

Tel.: +82-51-510-2816 (Y.-S.J.); +82-51-663-4889 (J.-H.K.);

† These authors contributed equally to this work.

## Supplementary Materials

| <u>Table of Contents</u>                          | <u>Page</u> |
|---------------------------------------------------|-------------|
| 1. <sup>1</sup> H and <sup>13</sup> C NMR spectra | S1-S39      |

## 1. $^1\text{H}$ and $^{13}\text{C}$ NMR spectra

**<sup>1</sup>H NMR:** Methyl (*S*)-2-(3-nitrobenzyl)-1-oxo-1,2,3,4-tetrahydropyrazino[1,2-*a*]indole-3-carboxylate (7a)

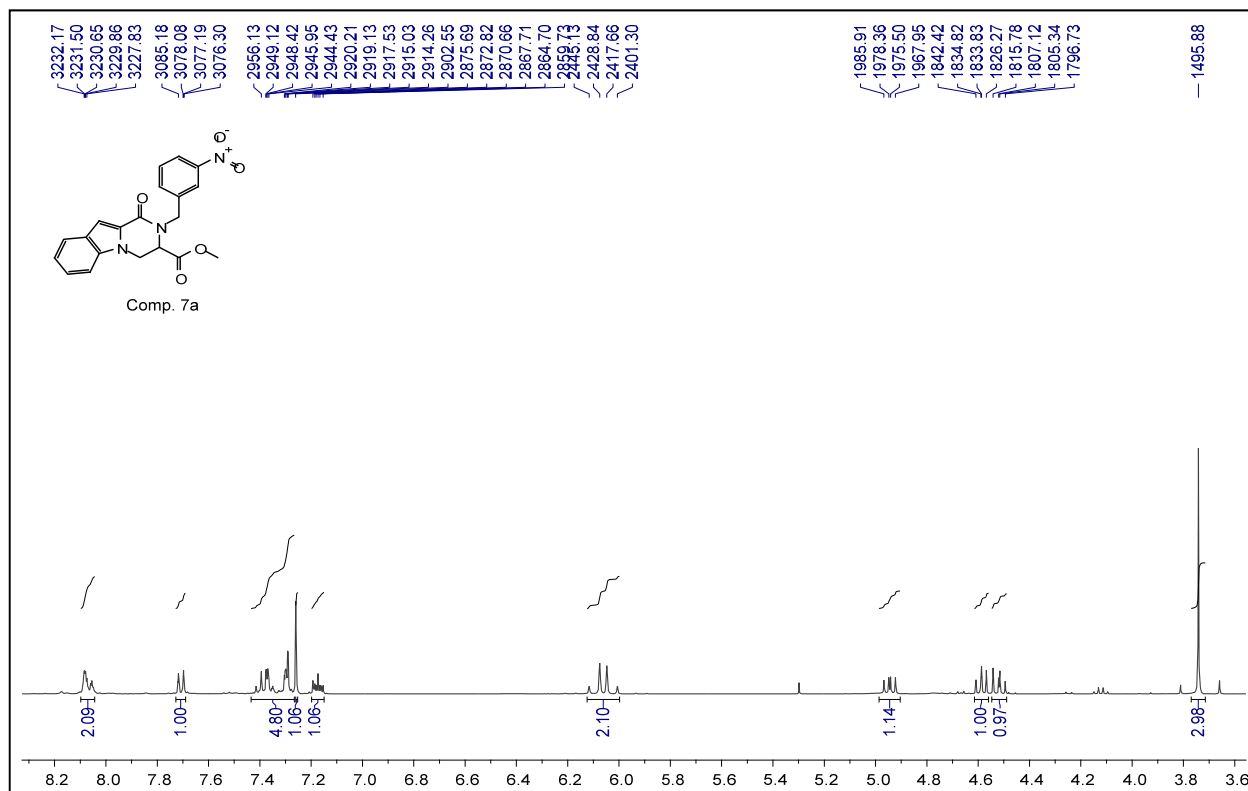

**<sup>13</sup>C NMR:** Methyl (*S*)-2-(3-nitrobenzyl)-1-oxo-1,2,3,4-tetrahydropyrazino[1,2-*a*]indole-3-carboxylate (7a)

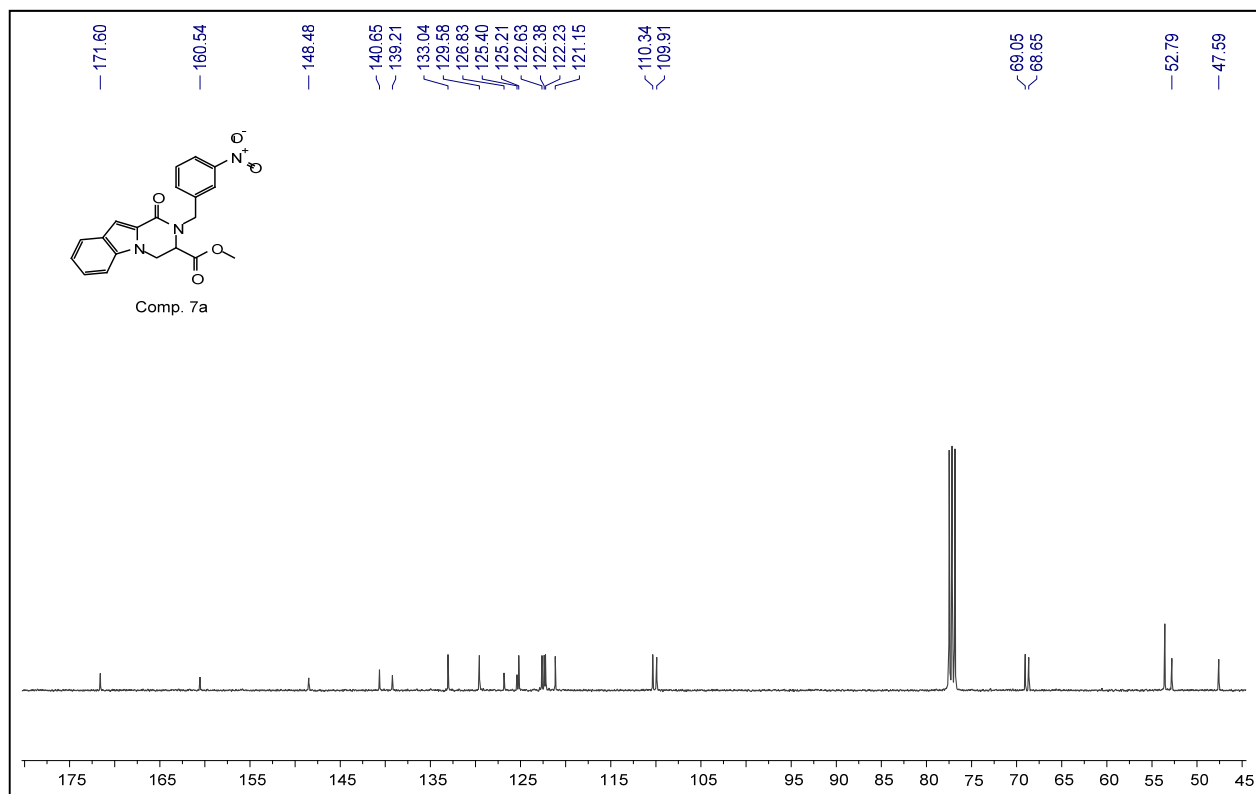

**<sup>1</sup>H NMR:** Methyl (*S*)-2-(4-nitrobenzyl)-1-oxo-1,2,3,4-tetrahydropyrazino[1,2-*a*]indole-3-carboxylate (7b)

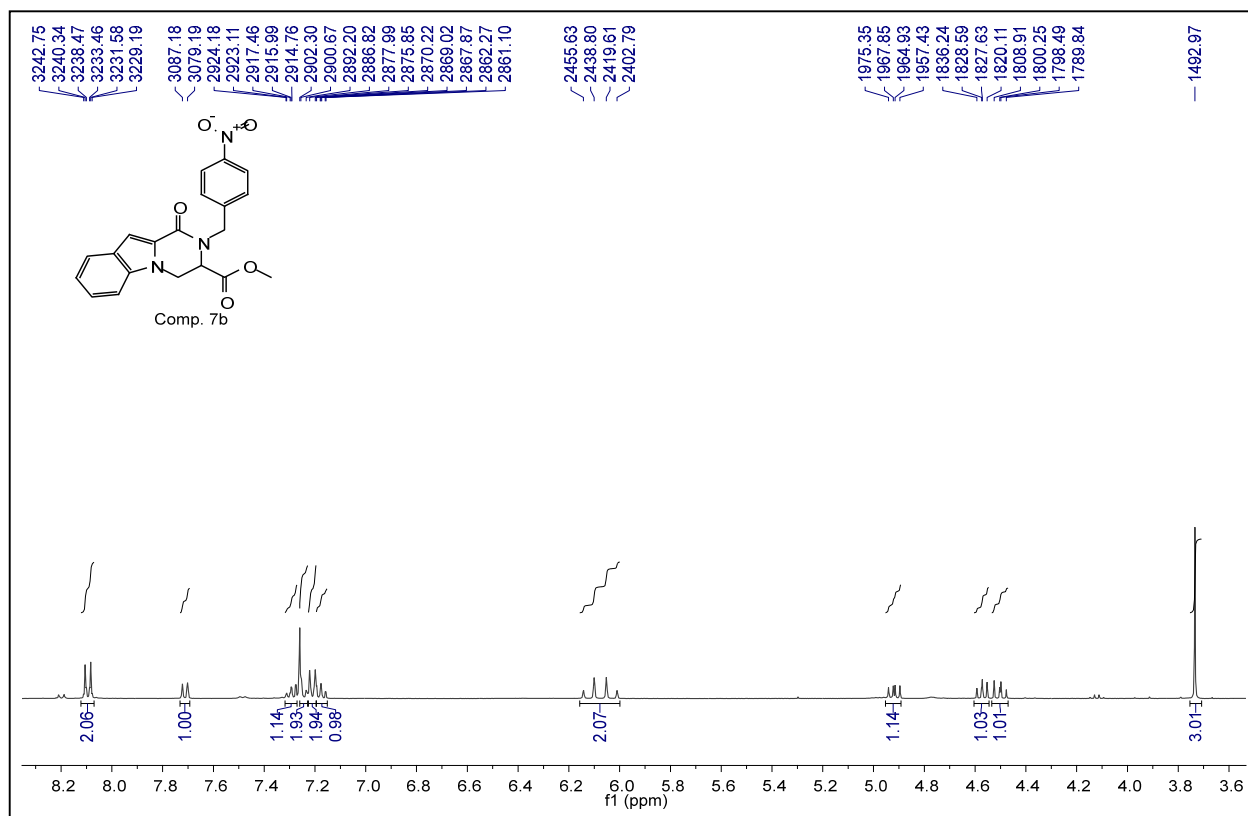

**<sup>13</sup>C NMR:** Methyl (*S*)-2-(4-nitrobenzyl)-1-oxo-1,2,3,4-tetrahydropyrazino[1,2-*a*]indole-3-carboxylate (**7b**)

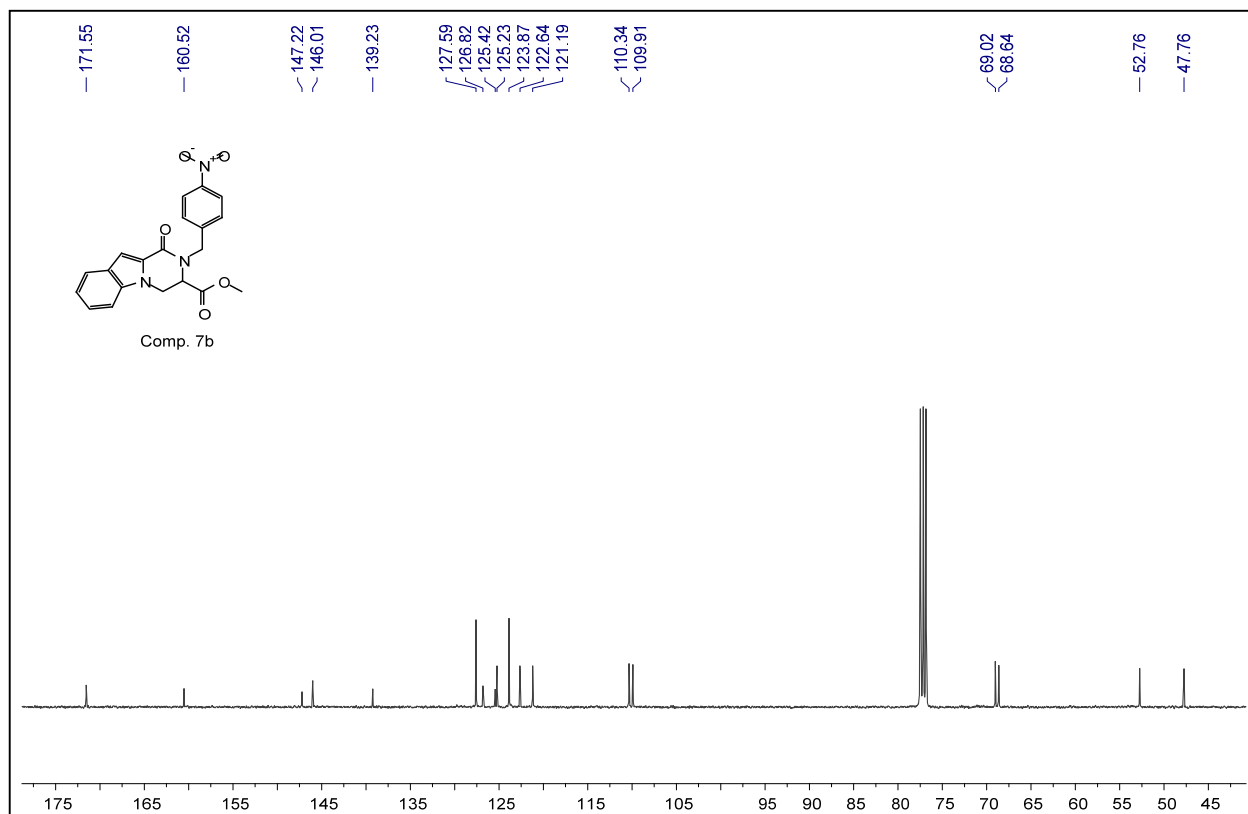

**<sup>1</sup>H NMR: Methyl (*S*)-2-(3-fluorobenzyl)-1-oxo-1,2,3,4-tetrahydropyrazino[1,2-*a*]indole-3-carboxylate (7c)**

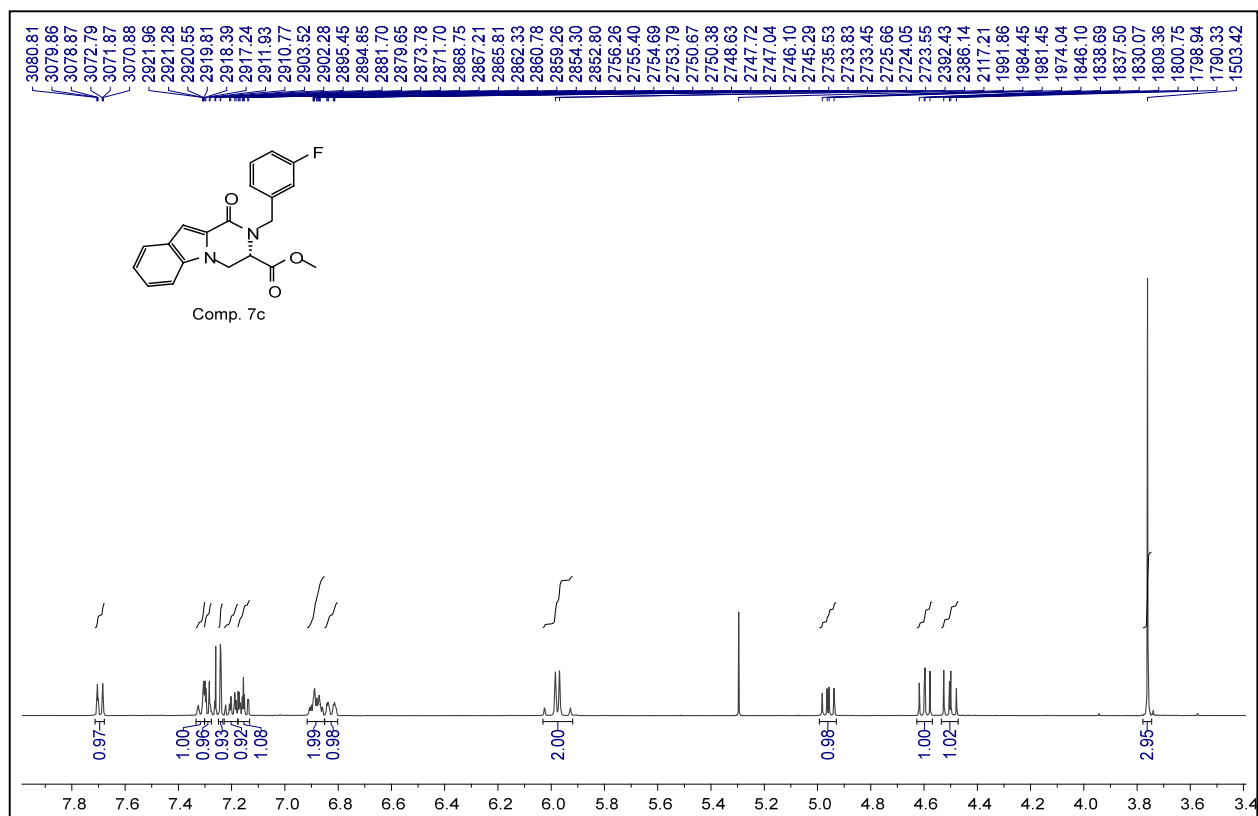

**<sup>13</sup>C NMR: Methyl (*S*)-2-(3-fluorobenzyl)-1-oxo-1,2,3,4-tetrahydropyrazino[1,2-*a*]indole-3-carboxylate (7c)**

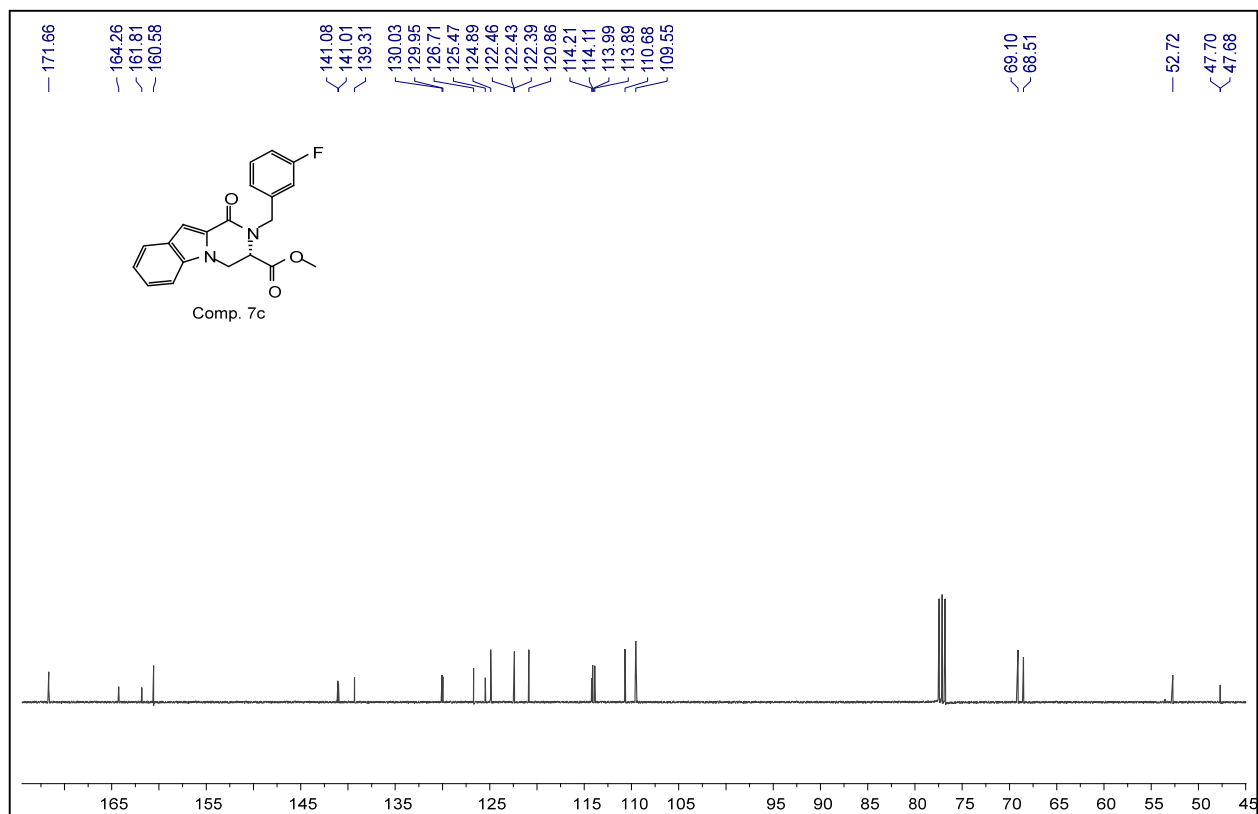

**<sup>1</sup>H NMR: Methyl (*S*)-2-(4-fluorobenzyl)-1-oxo-1,2,3,4-tetrahydropyrazino[1,2-*a*]indole-3-carboxylate (7d)**

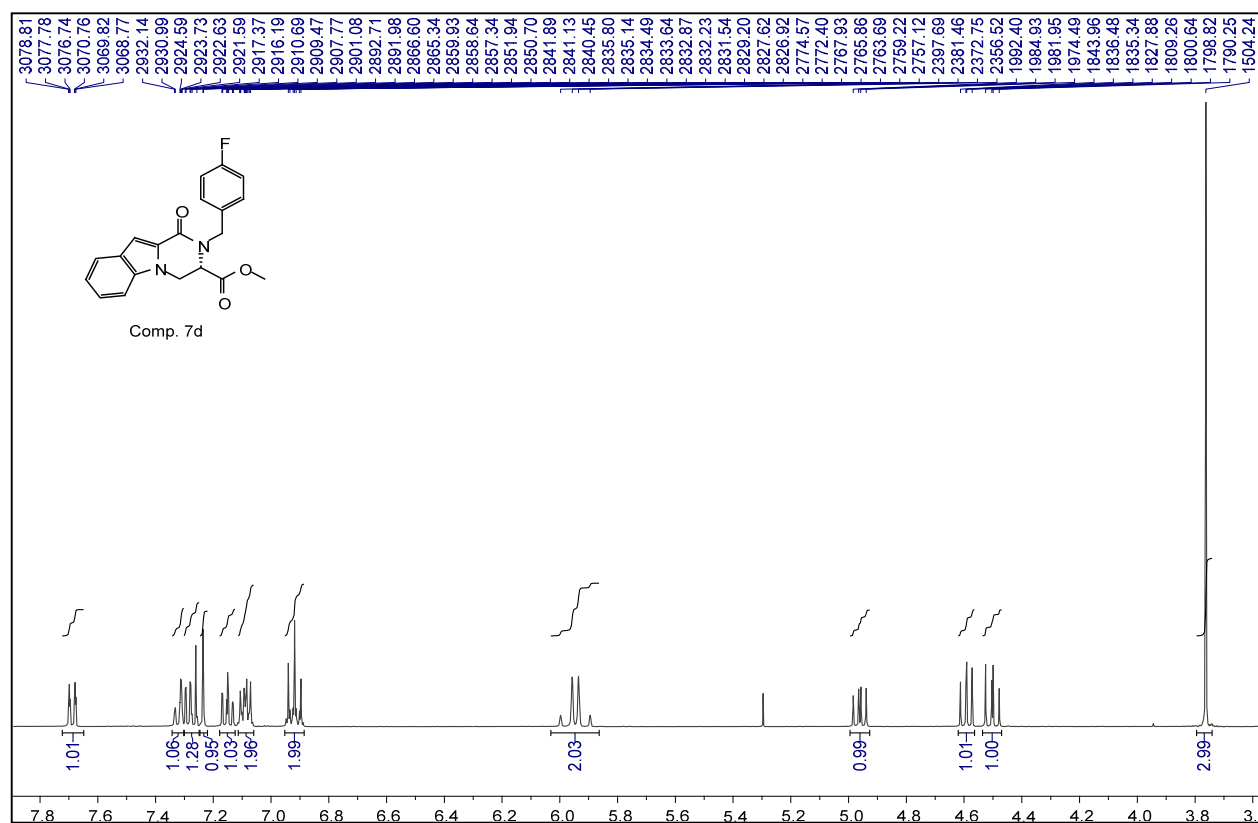

**<sup>13</sup>C NMR: Methyl (*S*)-2-(4-fluorobenzyl)-1-oxo-1,2,3,4-tetrahydropyrazino[1,2-*a*]indole-3-carboxylate (7d)**

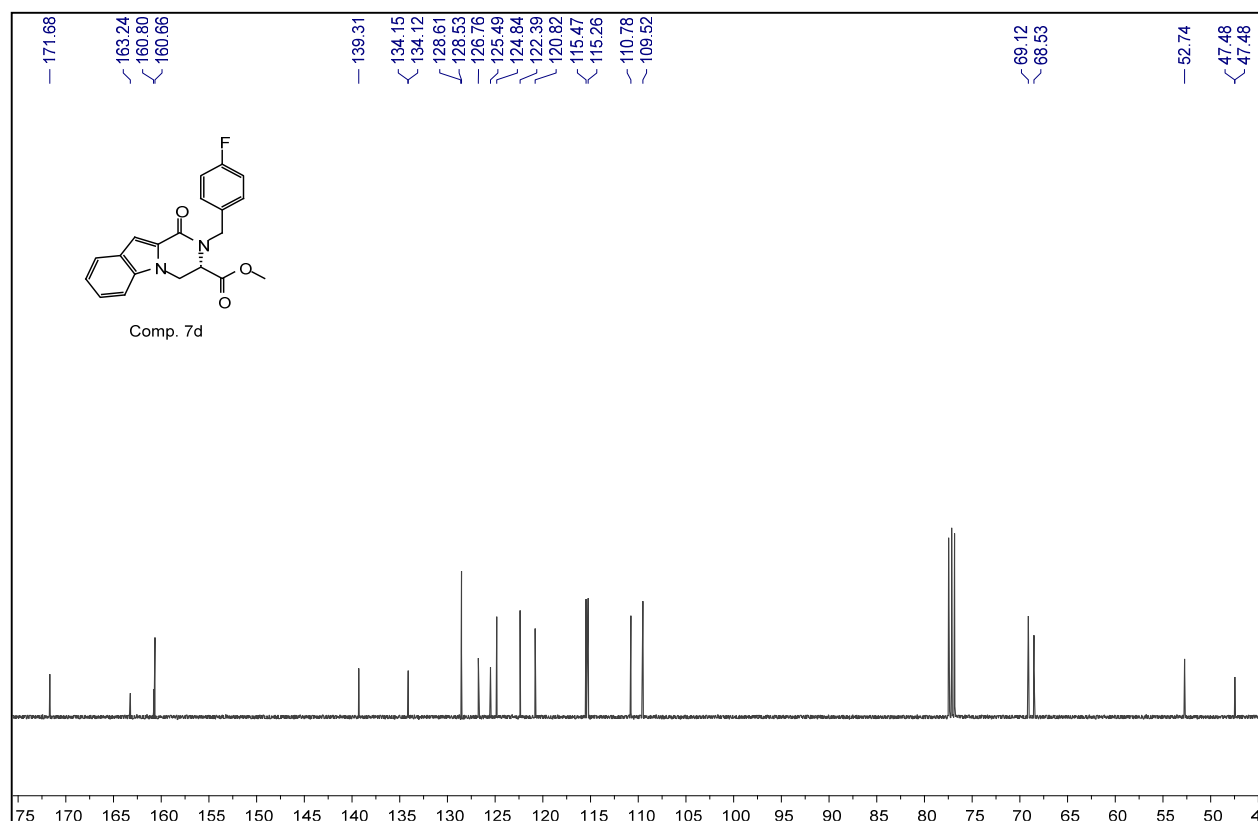

**<sup>1</sup>H NMR: Methyl (*S*)-2-(3-cyanobenzyl)-1-oxo-1,2,3,4-tetrahydropyrazino[1,2-*a*]indole-3-carboxylate (7e)**

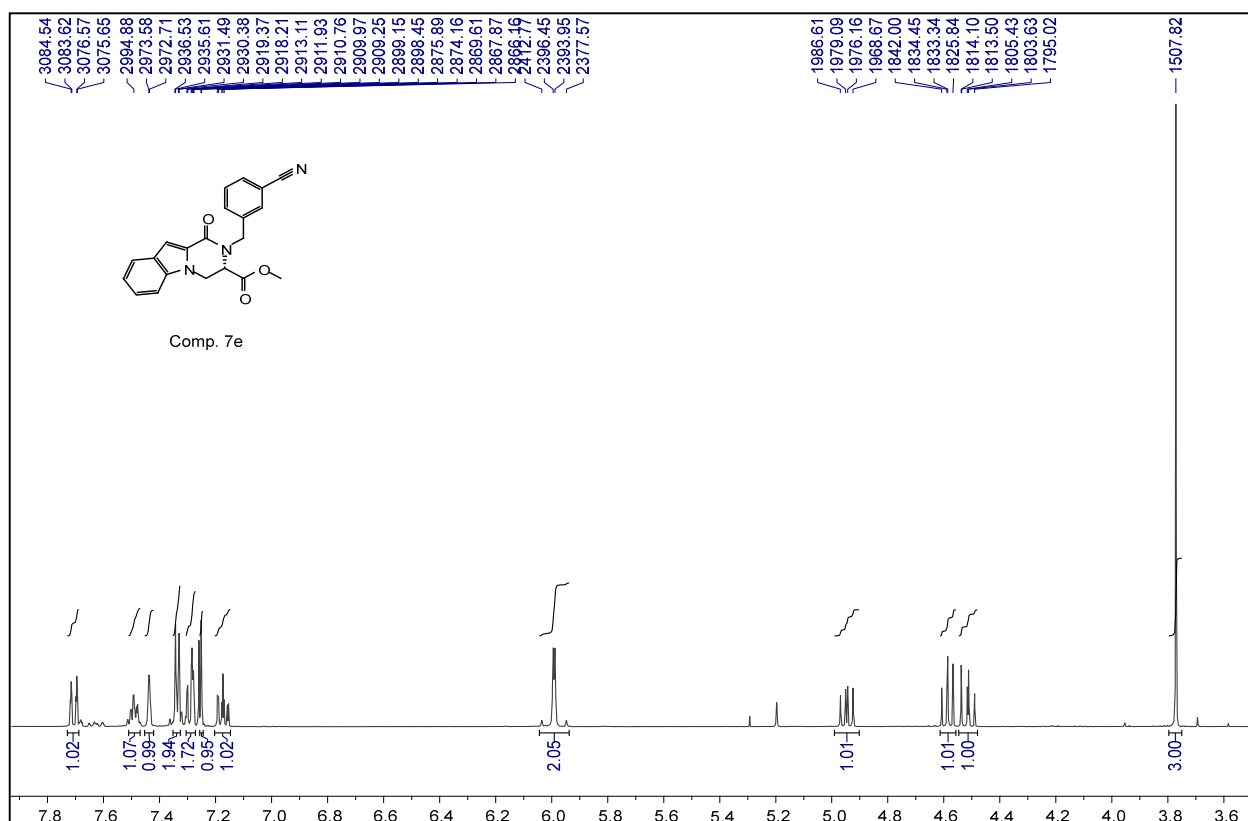

**<sup>13</sup>C NMR: Methyl (*S*)-2-(3-cyanobenzyl)-1-oxo-1,2,3,4-tetrahydropyrazino[1,2-*a*]indole-3-carboxylate (7e)**

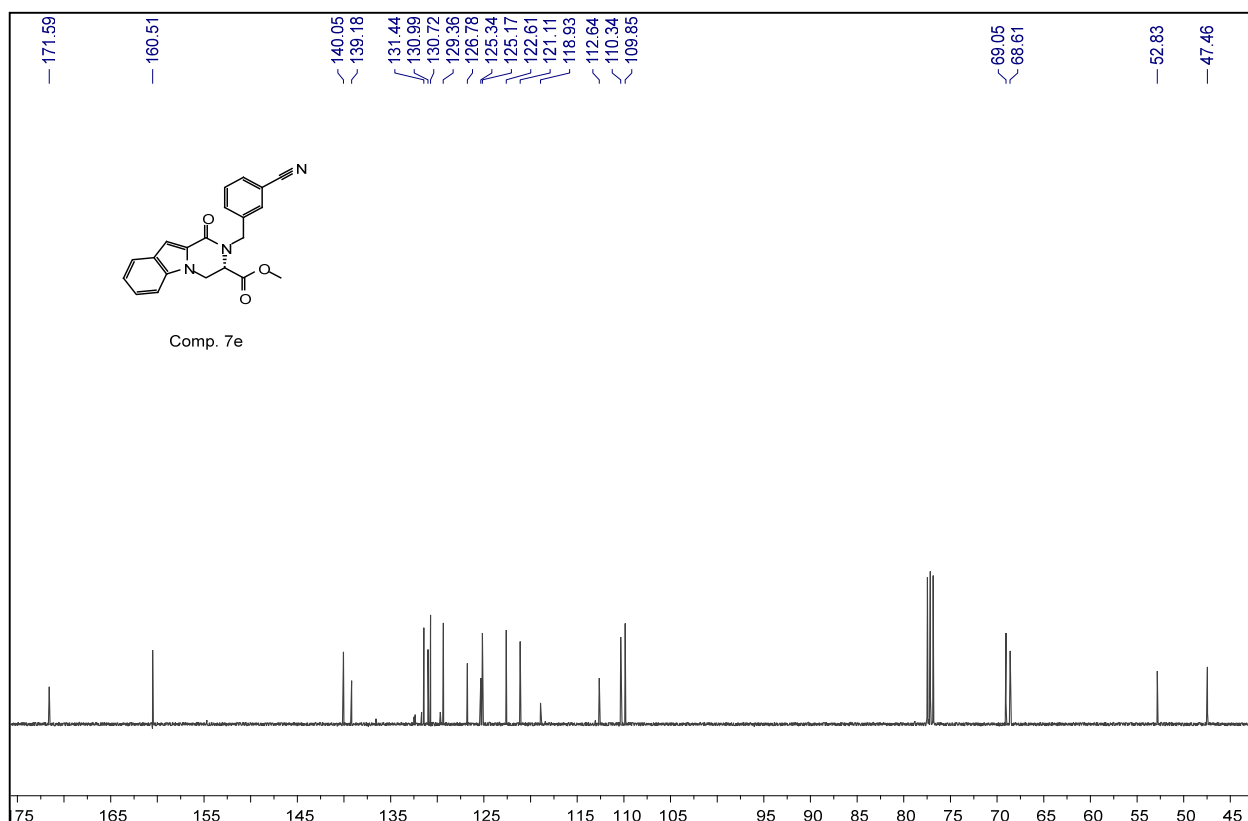

**<sup>1</sup>H NMR:** Methyl (*S*)-2-(4-cyanobenzyl)-1-oxo-1,2,3,4-tetrahydropyrazino[1,2-*a*]indole-3-carboxylate (7f)

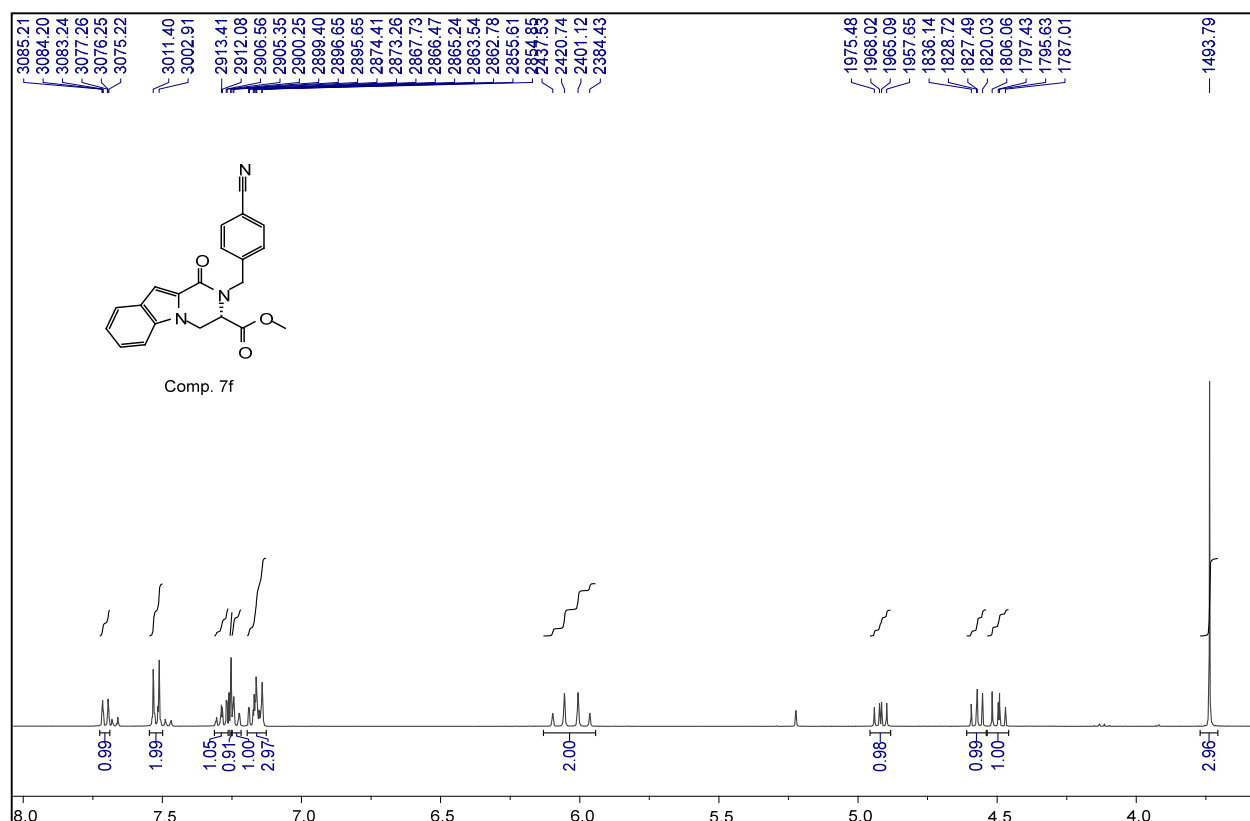

**<sup>13</sup>C NMR:** Methyl (*S*)-2-(4-cyanobenzyl)-1-oxo-1,2,3,4-tetrahydropyrazino[1,2-*a*]indole-3-carboxylate (7f)

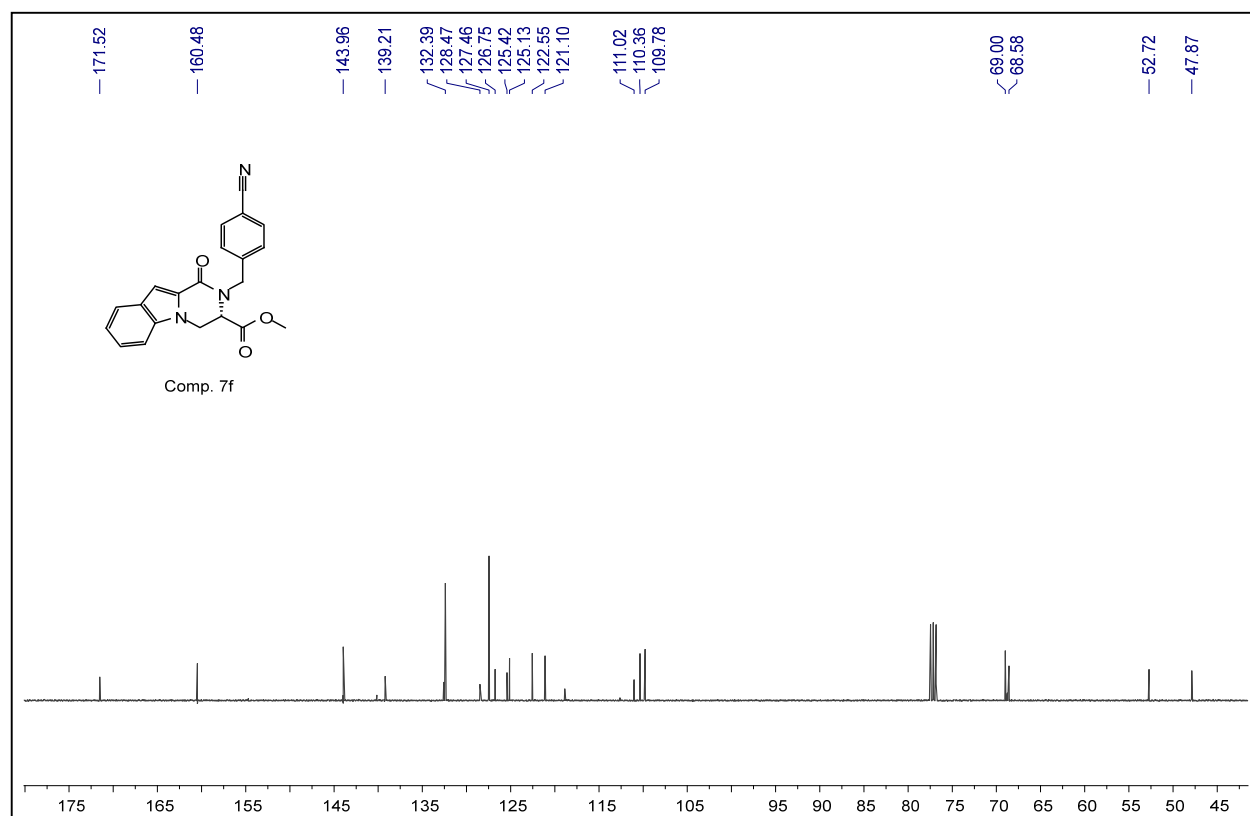

**<sup>1</sup>H NMR: Methyl (*S*)-2-(4-(trifluoromethyl)benzyl)-1-oxo-1,2,3,4-tetrahydropyrazino[1,2-*a*]indole-3-carboxylate (7g)**

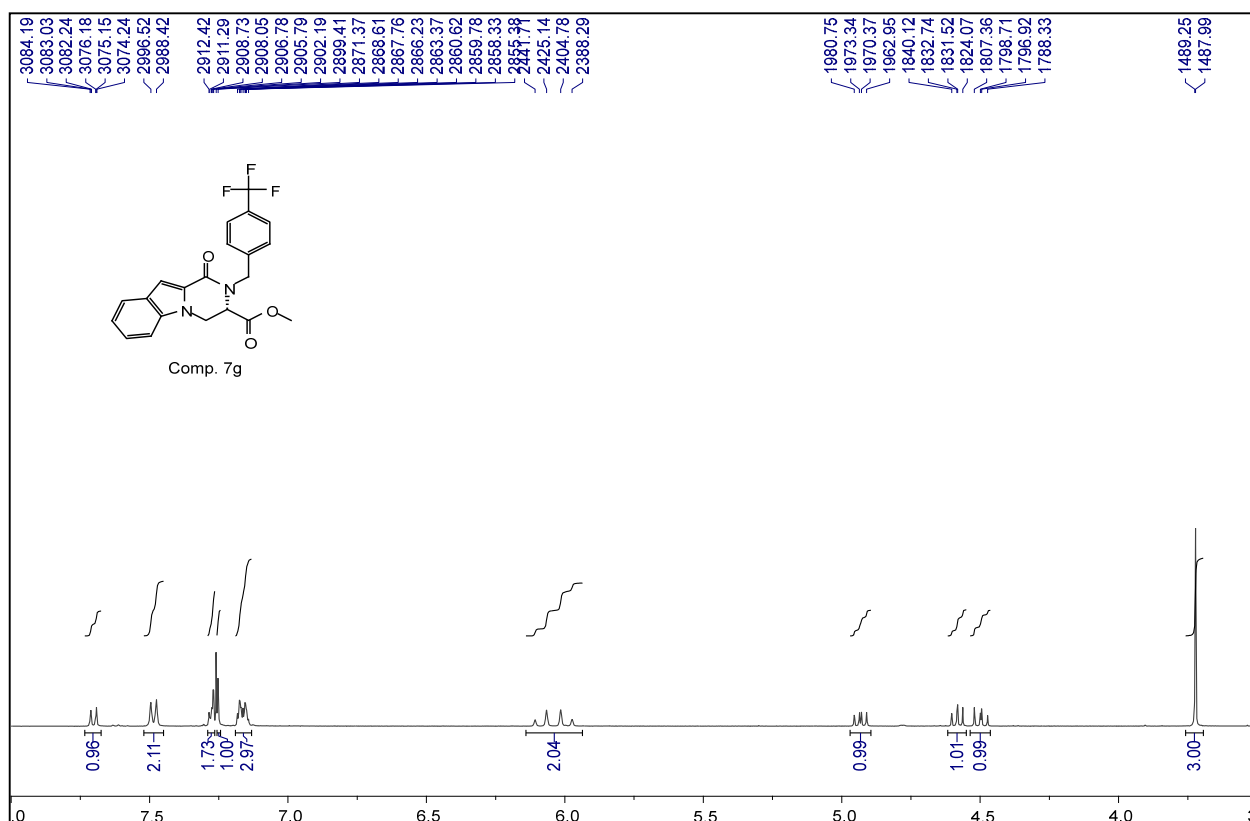

**<sup>13</sup>C NMR: Methyl (*S*)-2-(4-(trifluoromethyl)benzyl)-1-oxo-1,2,3,4-tetrahydropyrazino[1,2-*a*]indole-3-carboxylate (7g)**

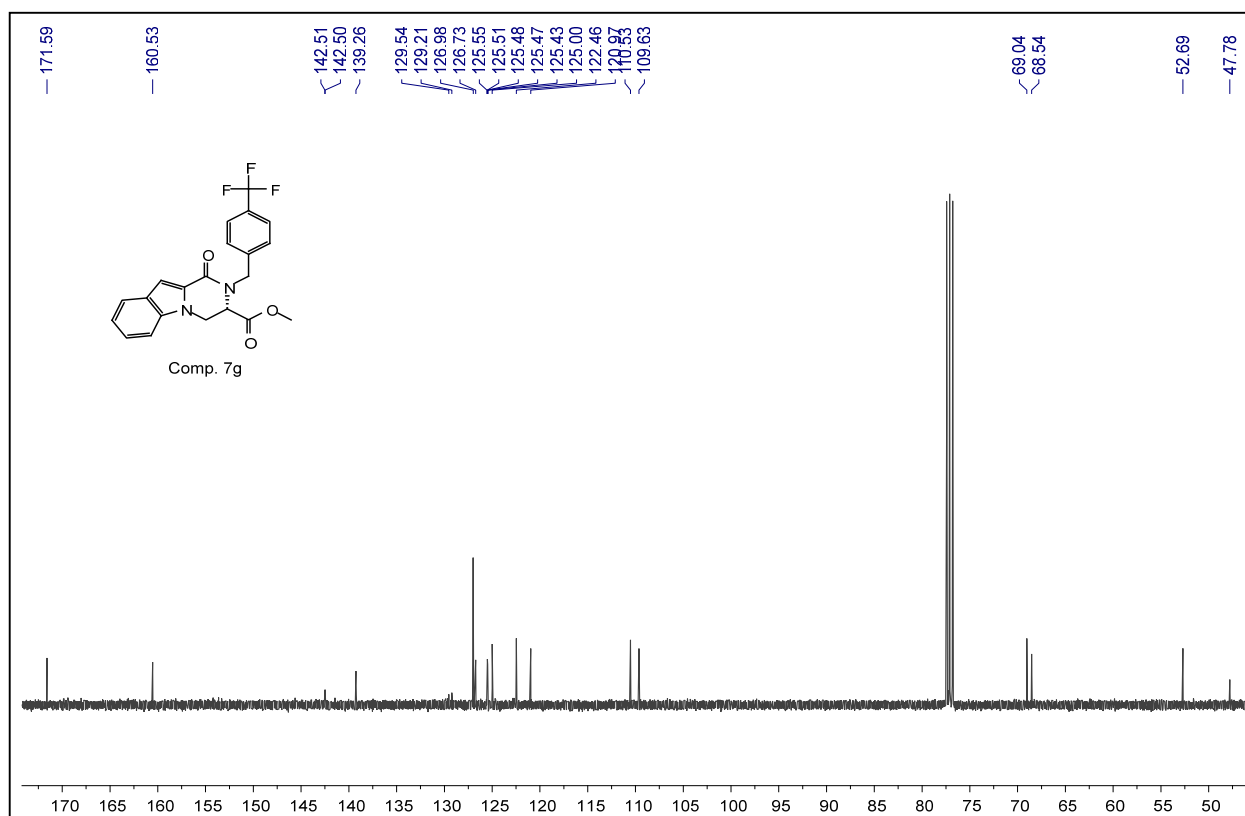



**<sup>1</sup>H NMR: Methyl (*S*)-2-(3-(trifluoromethoxy)benzyl)-1-oxo-1,2,3,4-tetrahydropyrazino[1,2-*a*]indole-3-carboxylate (7h)**

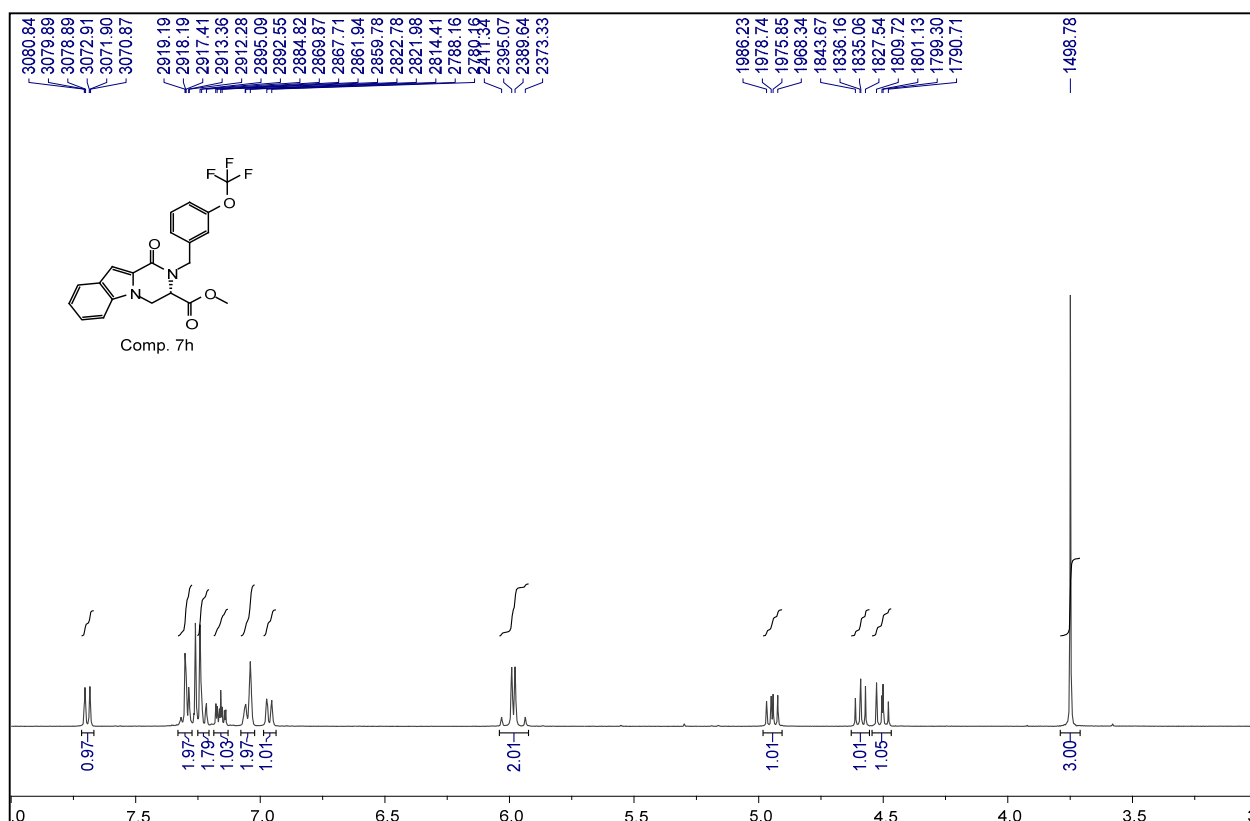

**<sup>13</sup>C NMR: Methyl (*S*)-2-(3-(trifluoromethoxy)benzyl)-1-oxo-1,2,3,4-tetrahydropyrazino[1,2-*a*]indole-3-carboxylate (7h)**

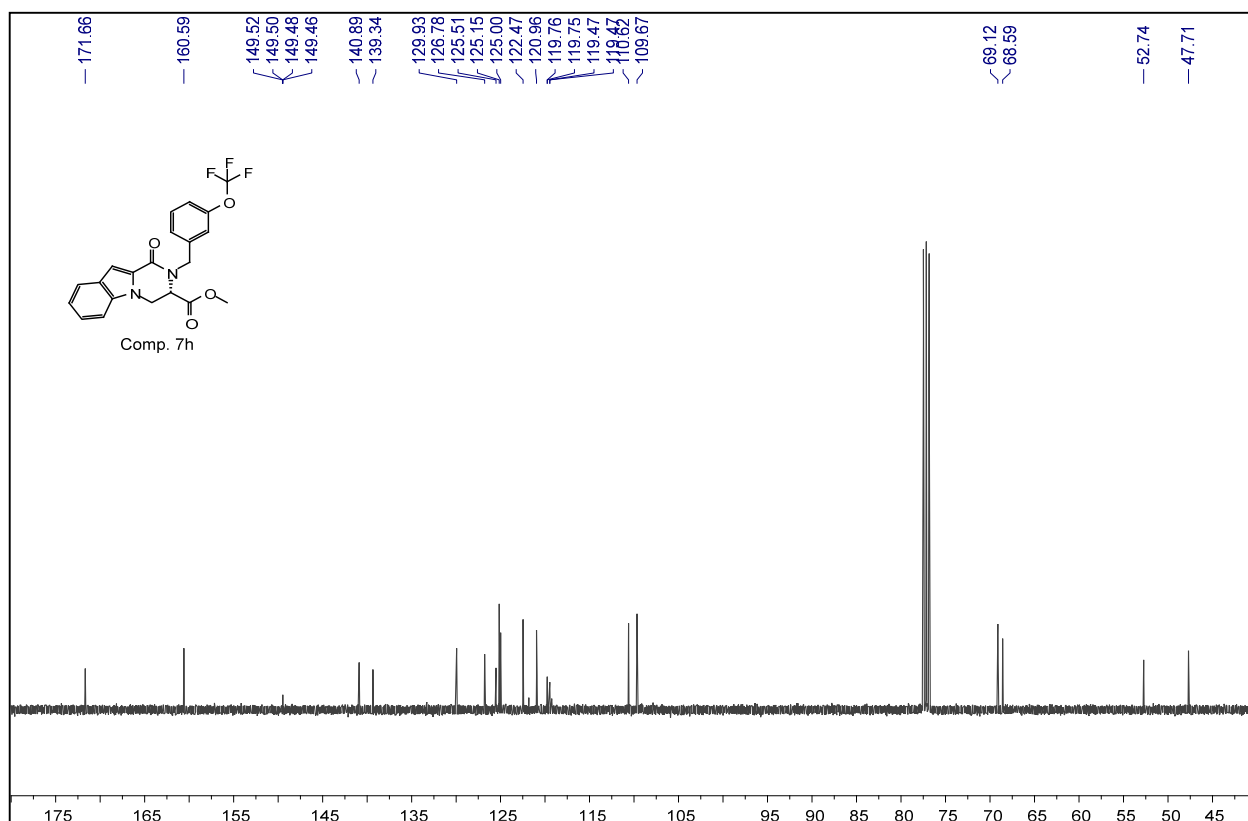

**<sup>1</sup>H NMR: Methyl (*S*)-2-(4-(trifluoromethoxy)benzyl)-1-oxo-1,2,3,4-tetrahydropyrazino[1,2-*a*]indole-3-carboxylate (7i)**

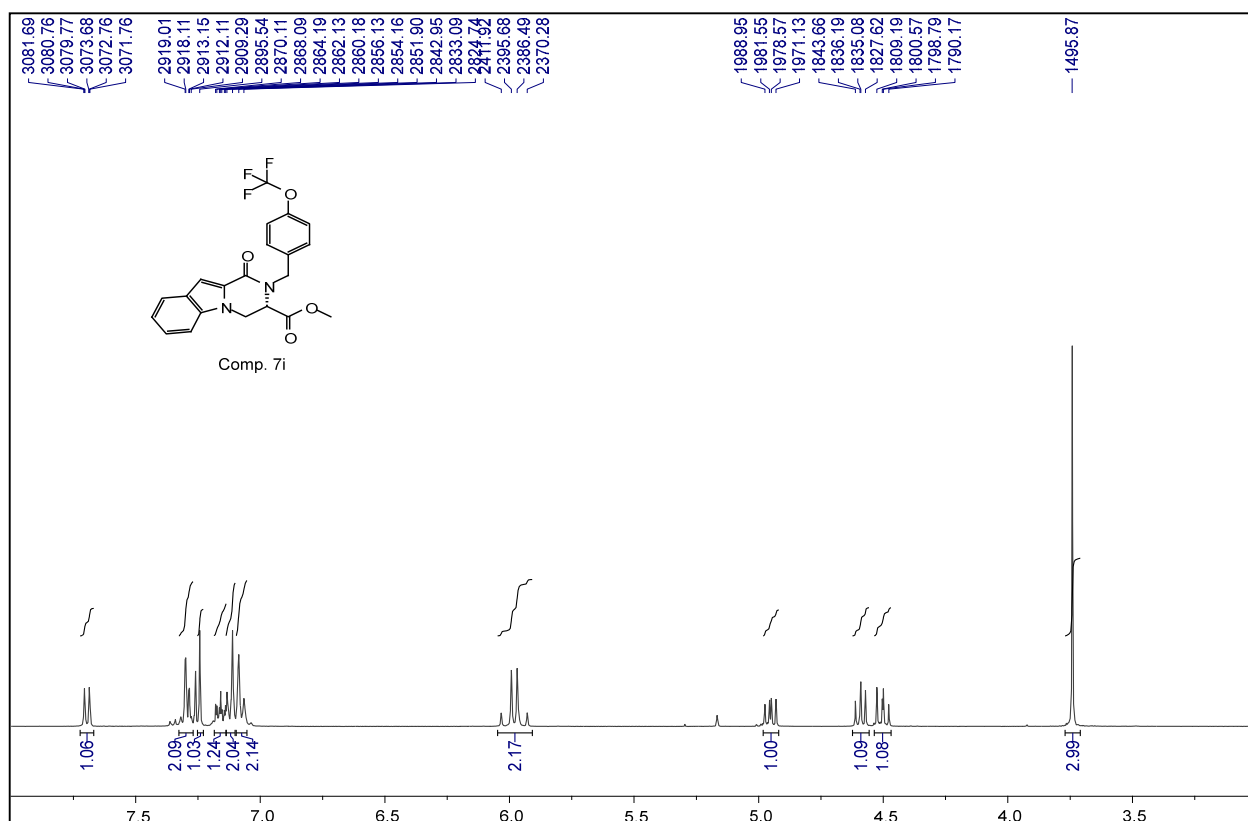

**<sup>13</sup>C NMR: Methyl (*S*)-2-(4-(trifluoromethoxy)benzyl)-1-oxo-1,2,3,4-tetrahydropyrazino[1,2-*a*]indole-3-carboxylate (7i)**

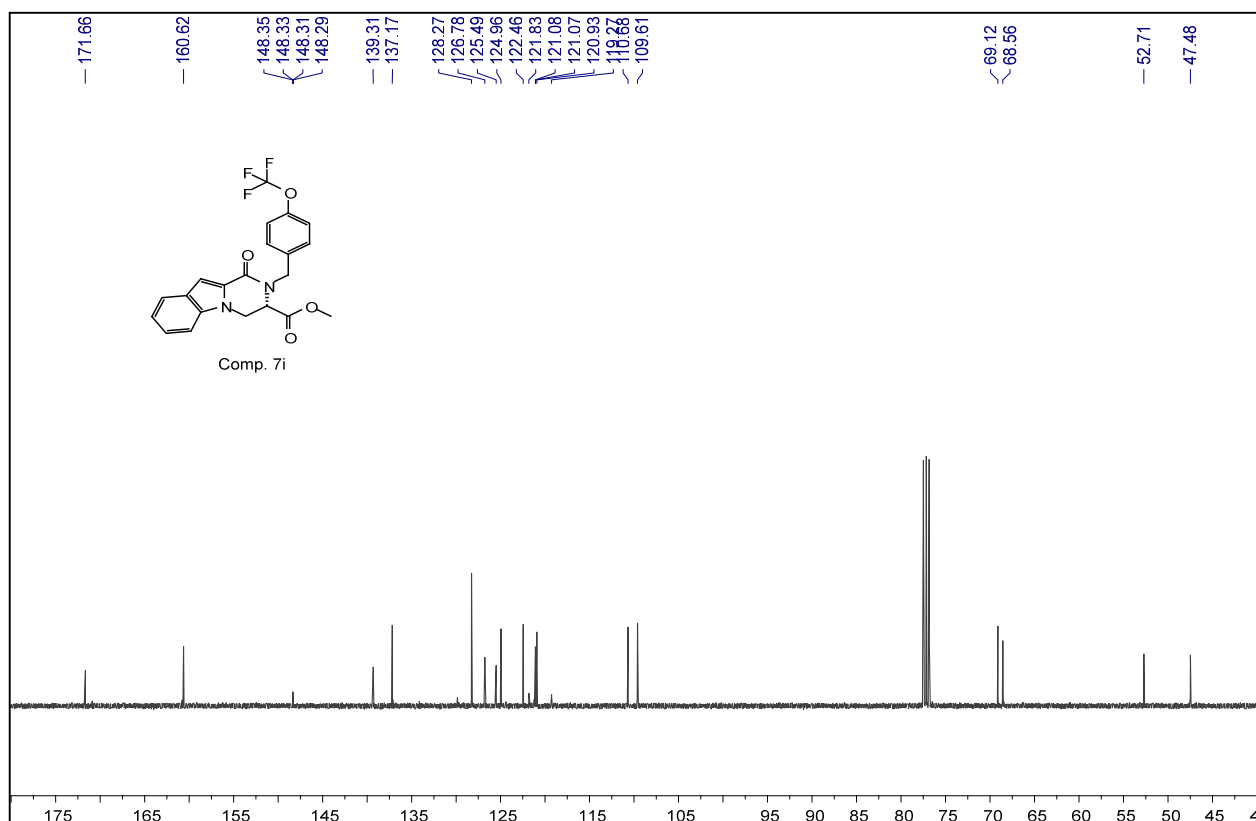

**<sup>1</sup>H NMR: Methyl (*S*)-2-(3-methylbenzyl)-1-oxo-1,2,3,4-tetrahydropyrazino[1,2-*a*]indole-3-carboxylate (7j)**

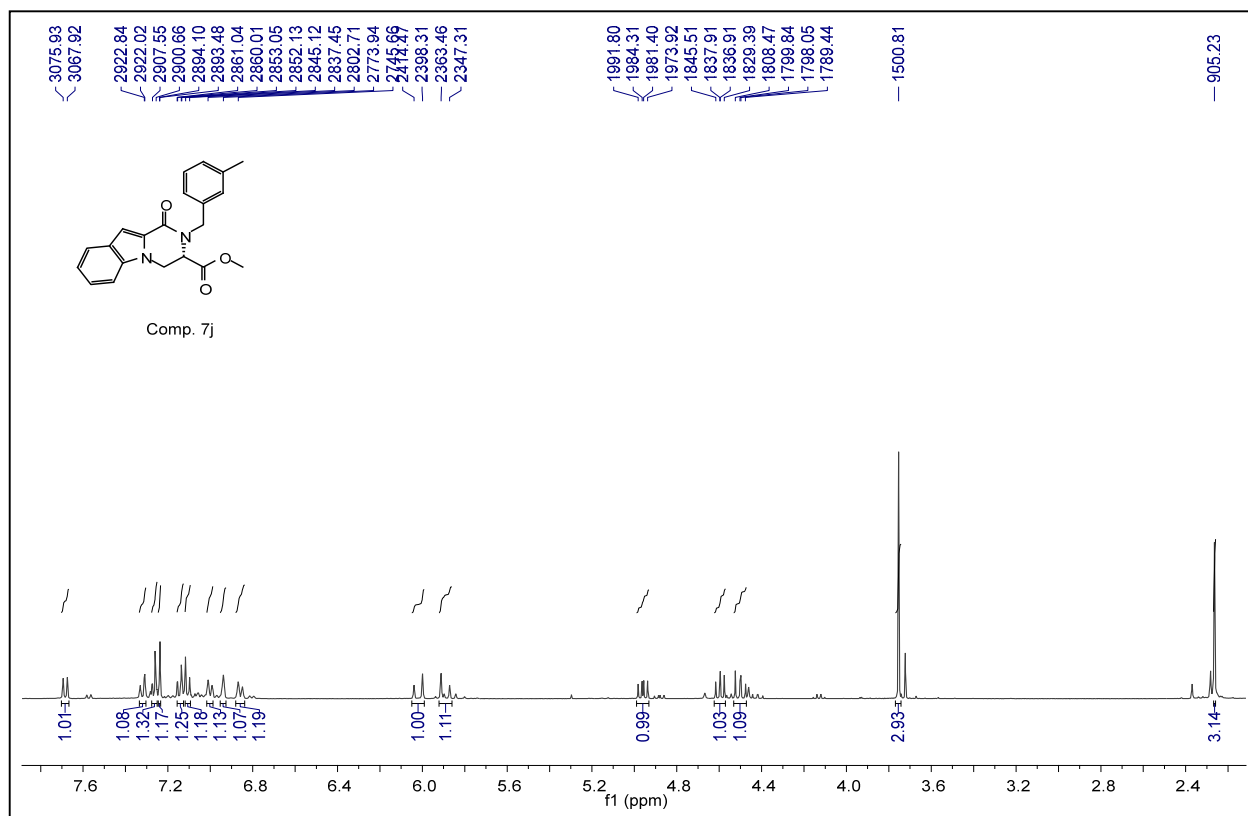

**<sup>13</sup>C NMR: Methyl (*S*)-2-(3-methylbenzyl)-1-oxo-1,2,3,4-tetrahydropyrazino[1,2-*a*]indole-3-carboxylate (7j)**

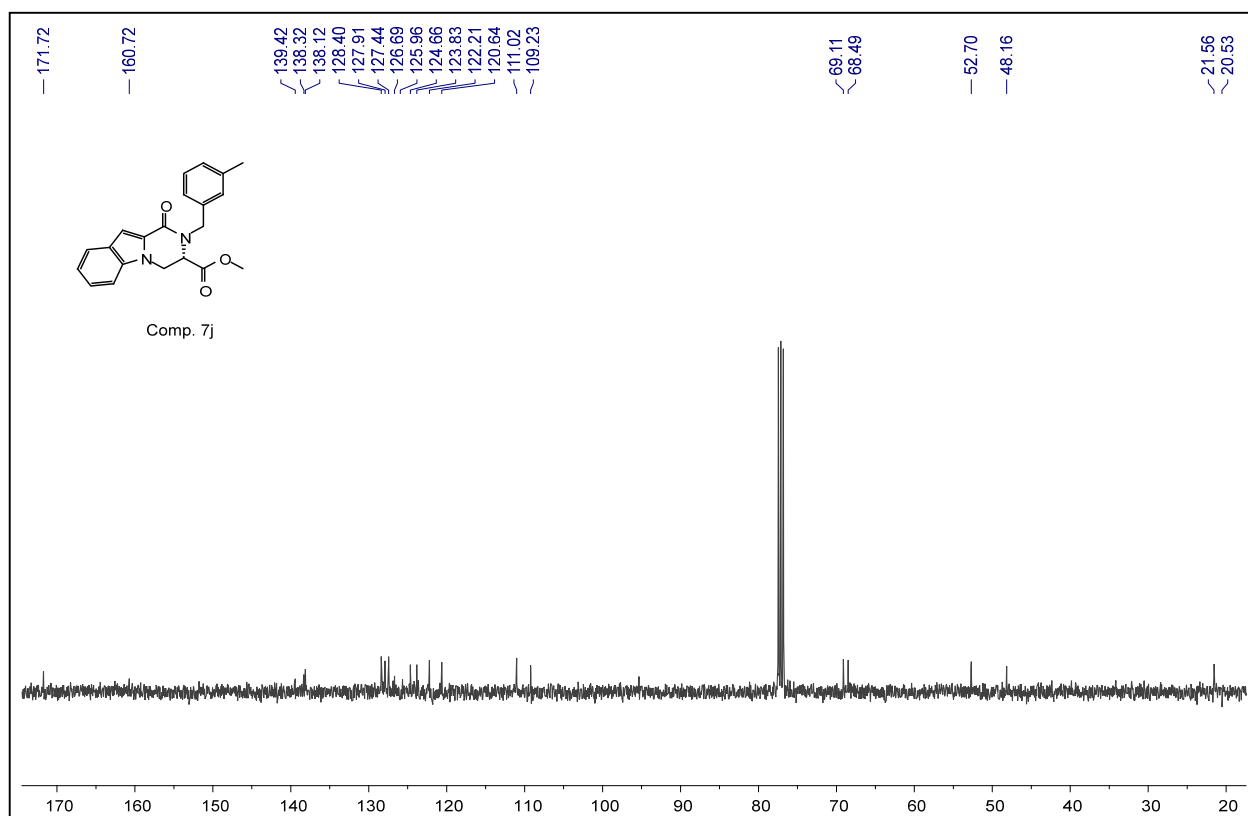

**<sup>1</sup>H NMR:** Methyl (*S*)-2-(4-methylbenzyl)-1-oxo-1,2,3,4-tetrahydropyrazino[1,2-*a*]indole-3-carboxylate (7k)

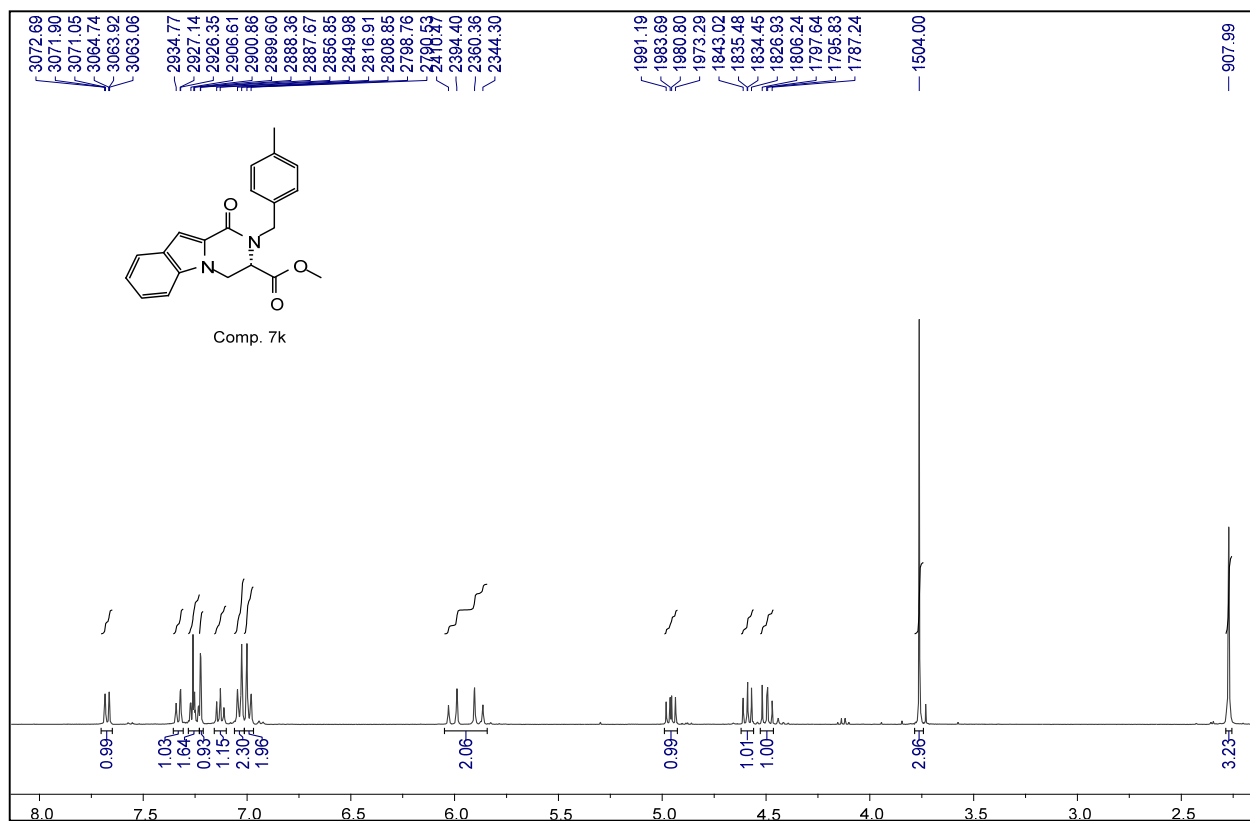

**<sup>13</sup>C NMR:** Methyl (*S*)-2-(4-methylbenzyl)-1-oxo-1,2,3,4-tetrahydropyrazino[1,2-*a*]indole-3-carboxylate (7k)

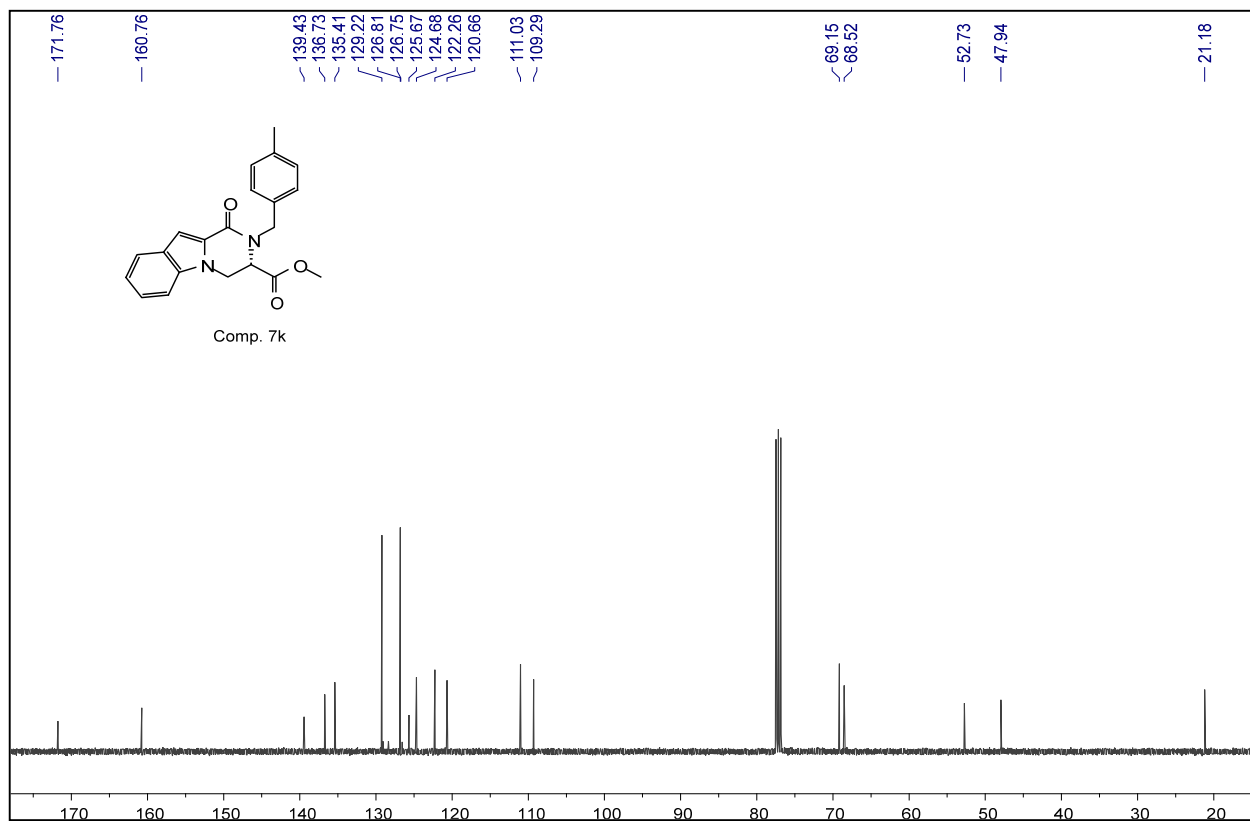

**<sup>1</sup>H NMR: Methyl (*S*)-2-(naphthalen-2-ylmethyl)-1-oxo-1,2,3,4-tetrahydropyrazino[1,2-*a*]indole-3-carboxylate (71)**

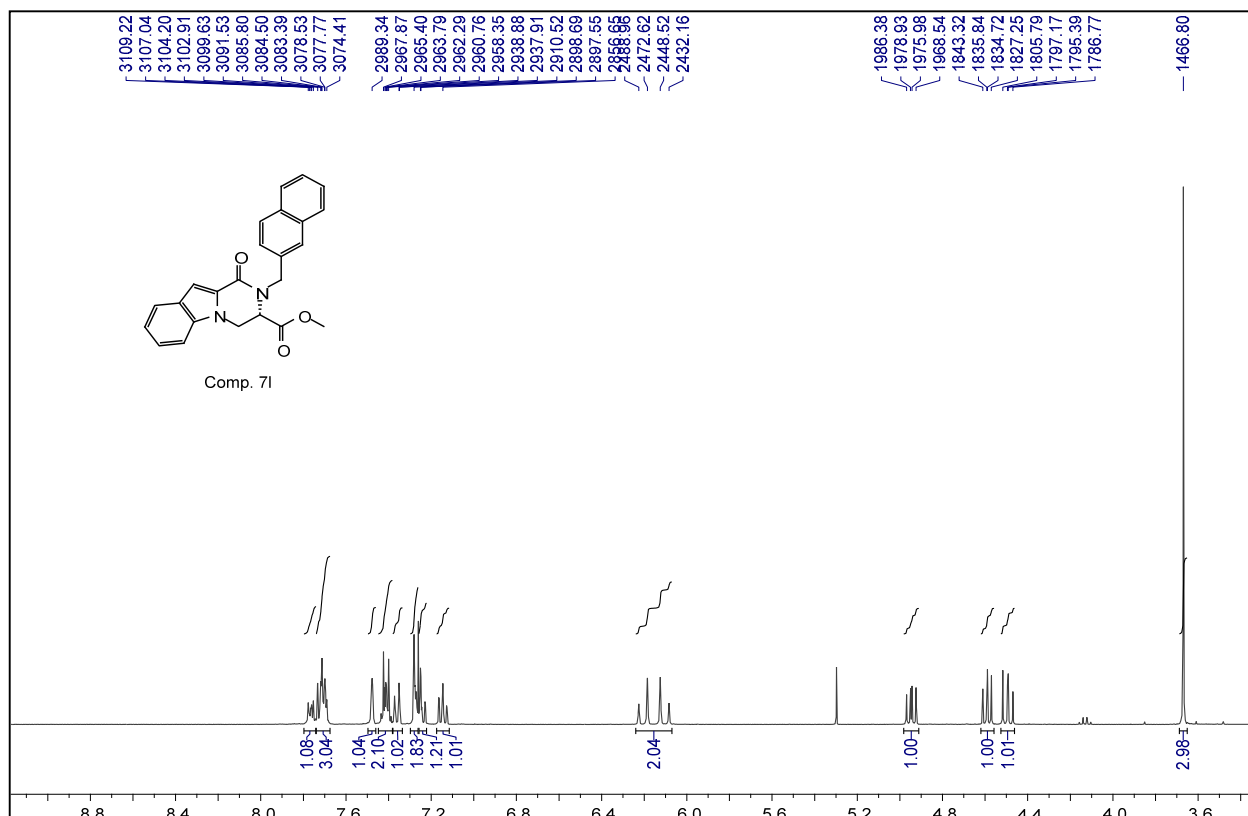

**<sup>13</sup>C NMR: Methyl (*S*)-2-(naphthalen-2-ylmethyl)-1-oxo-1,2,3,4-tetrahydropyrazino[1,2-*a*]indole-3-carboxylate (71)**

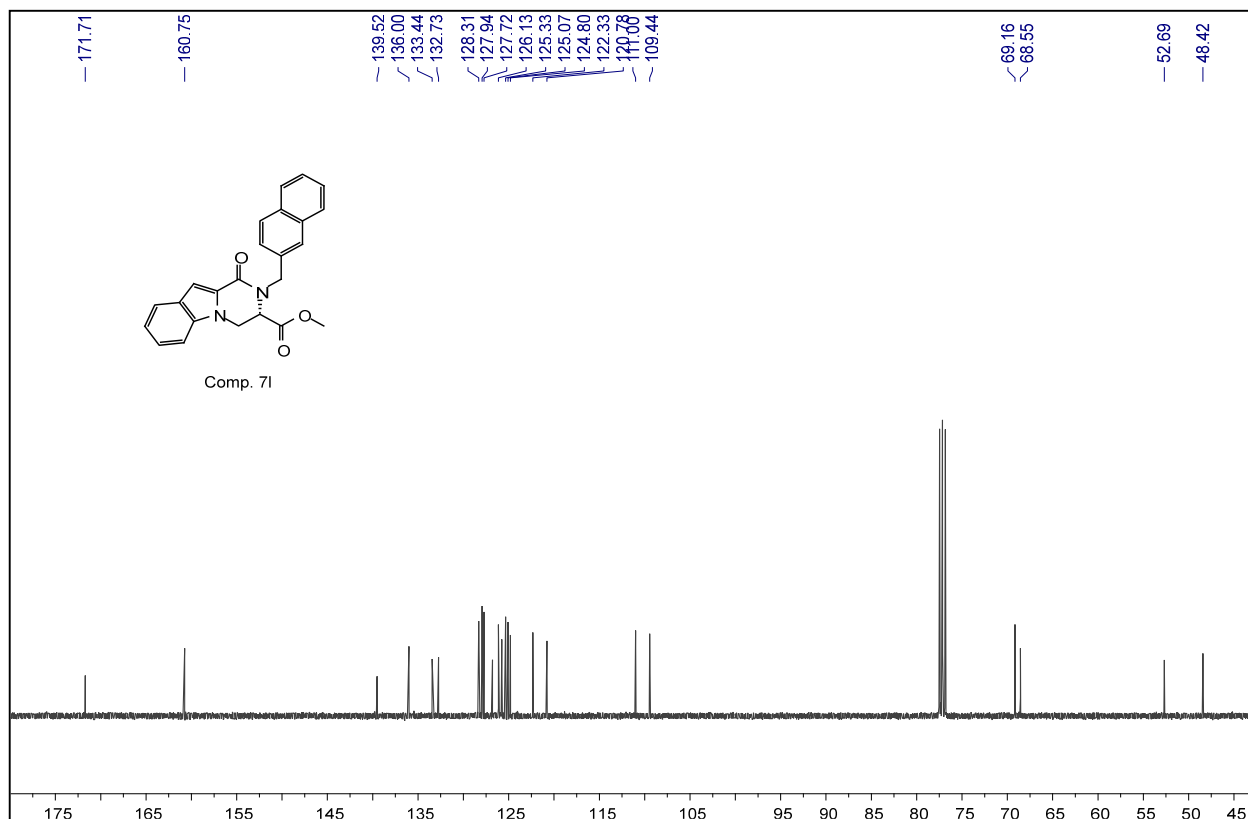

**<sup>1</sup>H NMR: Methyl (*S*)-2-([1,1'-biphenyl]-4-ylmethyl)-1-oxo-1,2,3,4-tetrahydropyrazino[1,2-*a*]indole-3-carboxylate (7m)**

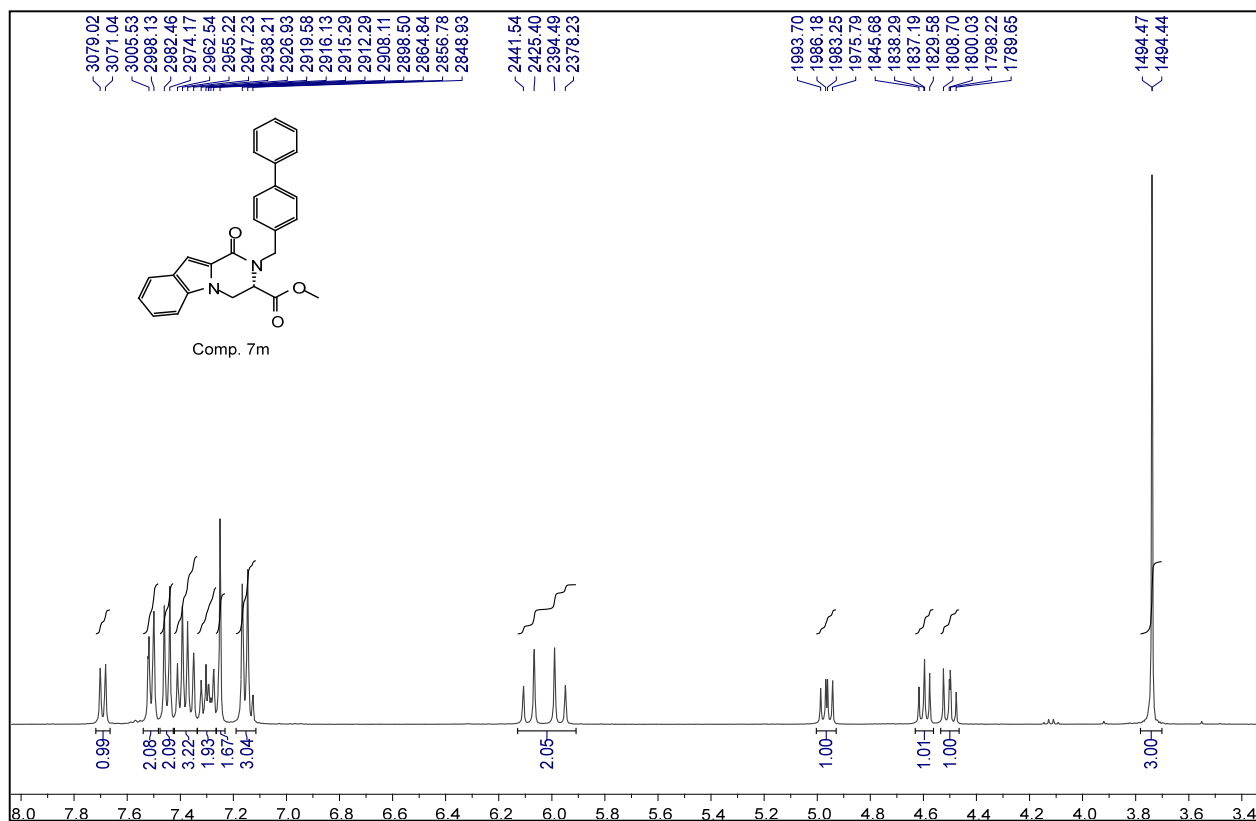

**<sup>13</sup>C NMR: Methyl (*S*)-2-([1,1'-biphenyl]-4-ylmethyl)-1-oxo-1,2,3,4-tetrahydropyrazino[1,2-*a*]indole-3-carboxylate (7m)**

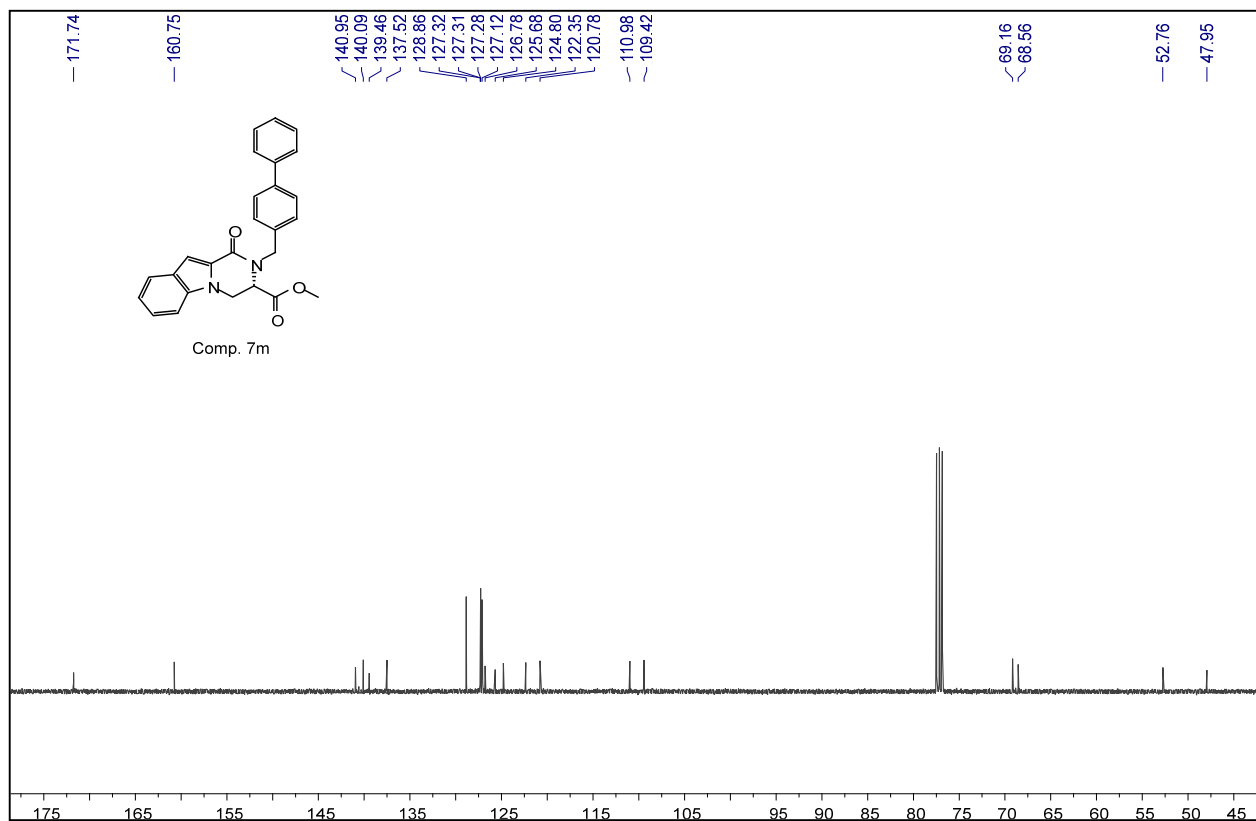

**<sup>1</sup>H NMR: (S)-N-(Furan-2-ylmethyl)-2-(3-nitrobenzyl)-1-oxo-1,2,3,4-tetrahydropyrazino[1,2-a]indole-3-carboxamide (1a)**

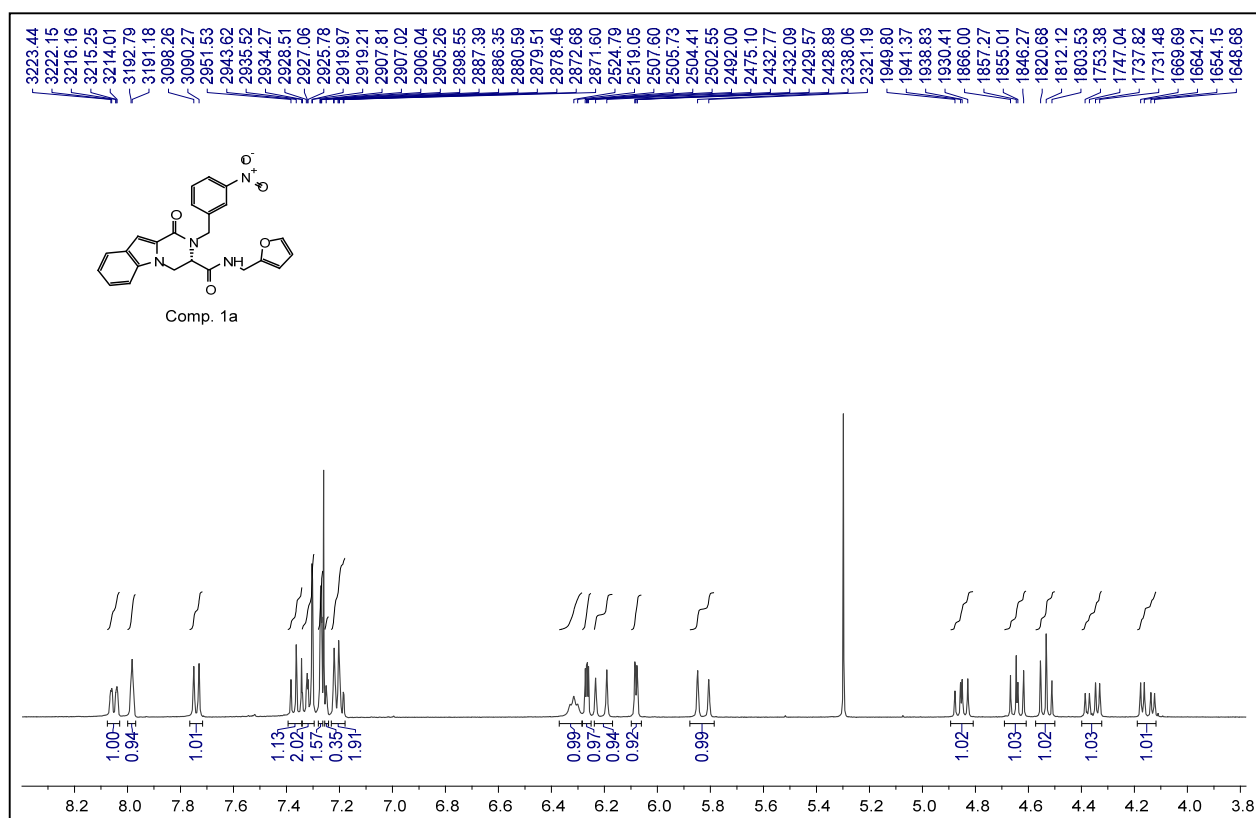

**<sup>13</sup>C NMR: (S)-N-(Furan-2-ylmethyl)-2-(3-nitrobenzyl)-1-oxo-1,2,3,4-tetrahydropyrazino[1,2-a]indole-3-carboxamide (1a)**

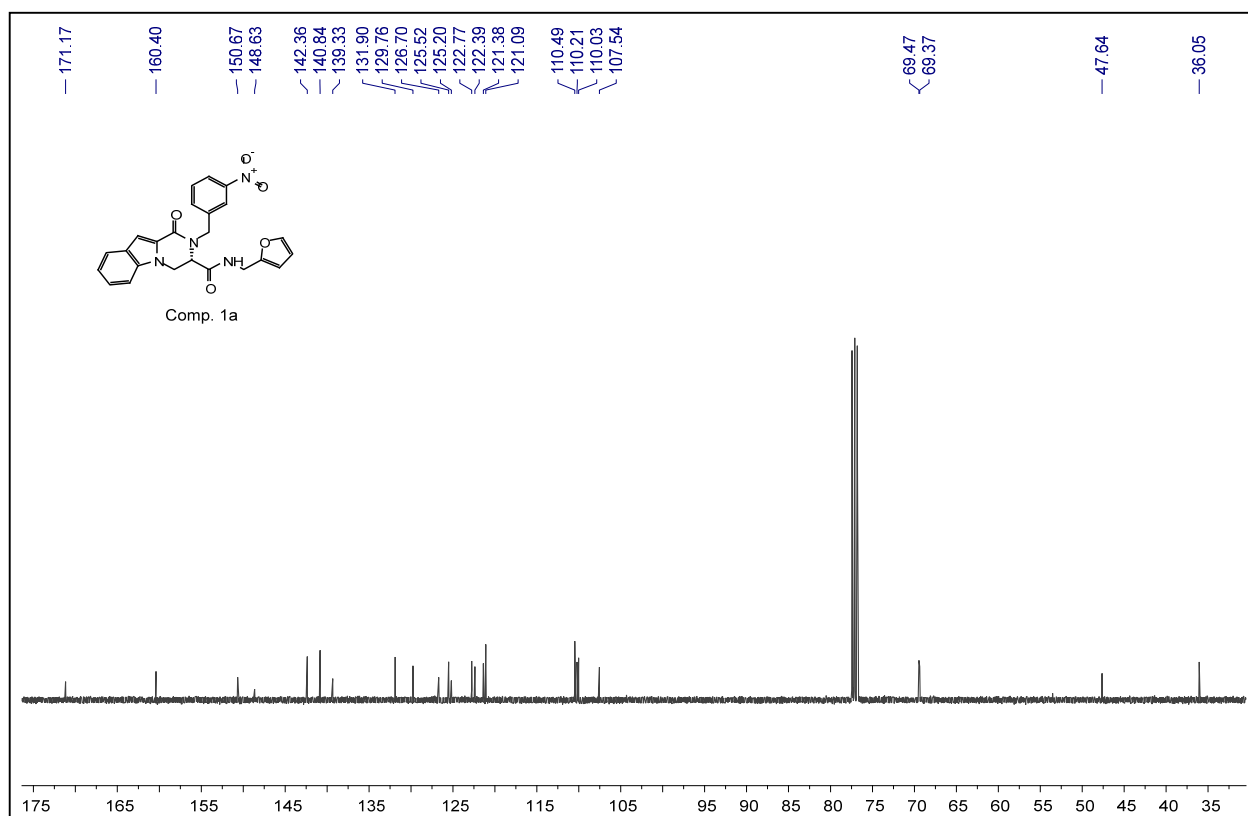

**<sup>1</sup>H NMR: (S)-N-(Furan-2-ylmethyl)-2-(4-nitrobenzyl)-1-oxo-1,2,3,4-tetrahydropyrazino[1,2-a]indole-3-carboxamide (1b)**

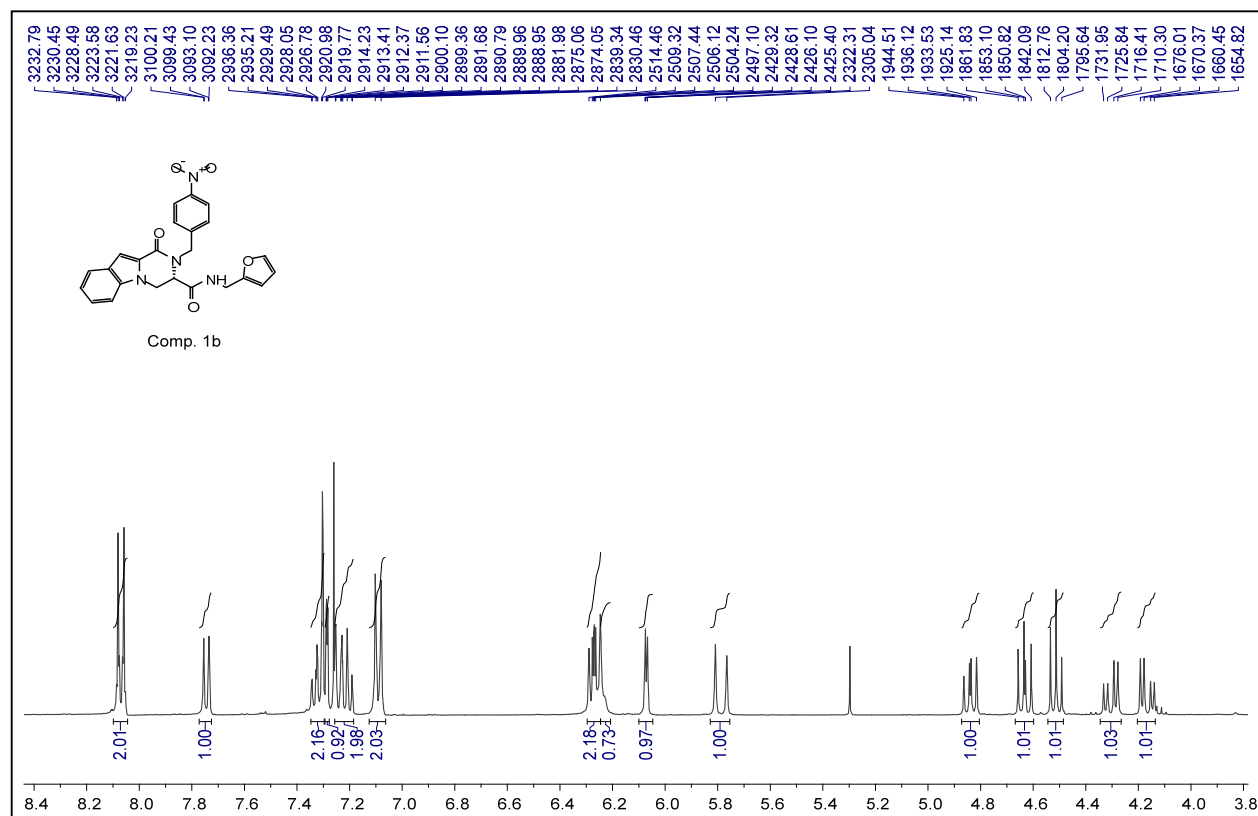

**<sup>13</sup>C NMR: (S)-N-(Furan-2-ylmethyl)-2-(4-nitrobenzyl)-1-oxo-1,2,3,4-tetrahydropyrazino[1,2-a]indole-3-carboxamide (1b)**

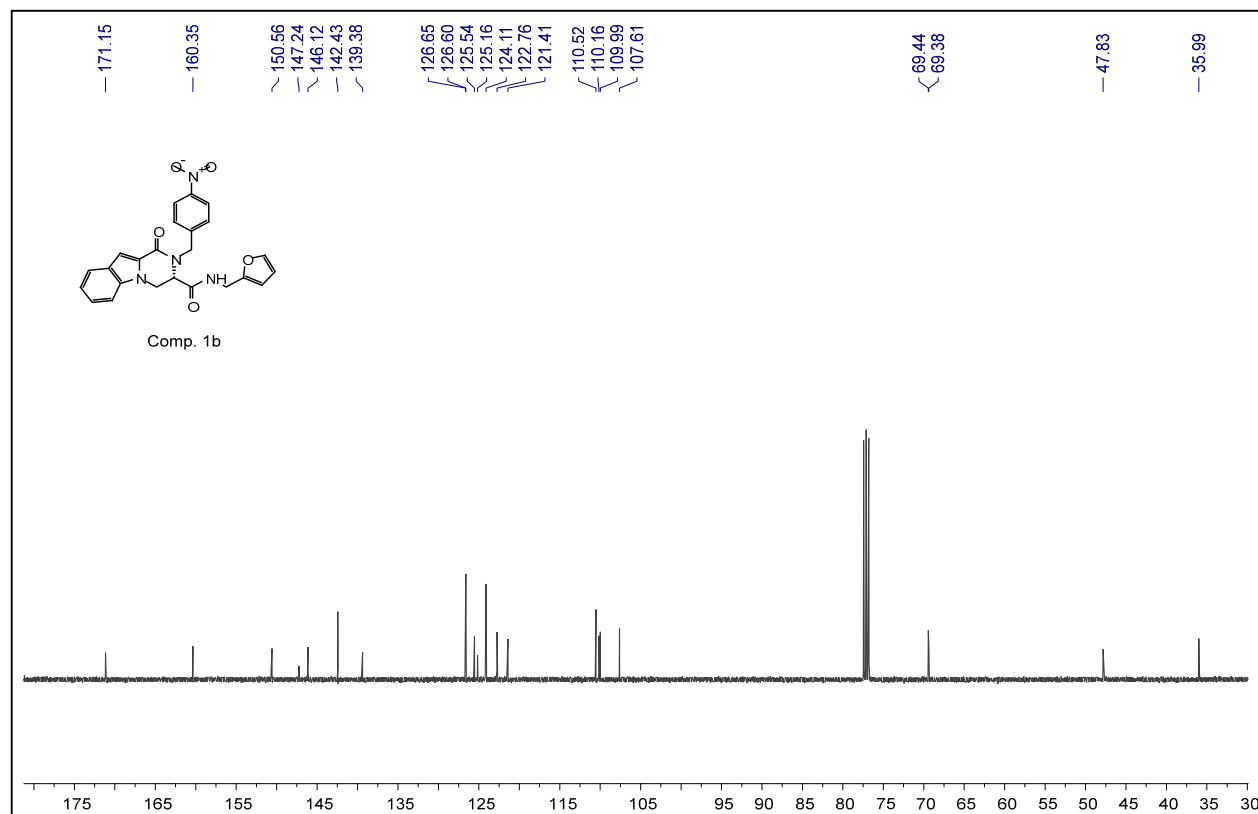



**<sup>1</sup>H NMR: (S)-N-(Furan-2-ylmethyl)-2-(3-fluorobenzyl)-1-oxo-1,2,3,4-tetrahydropyrazino[1,2-a]indole-3-carboxamide (1c)**

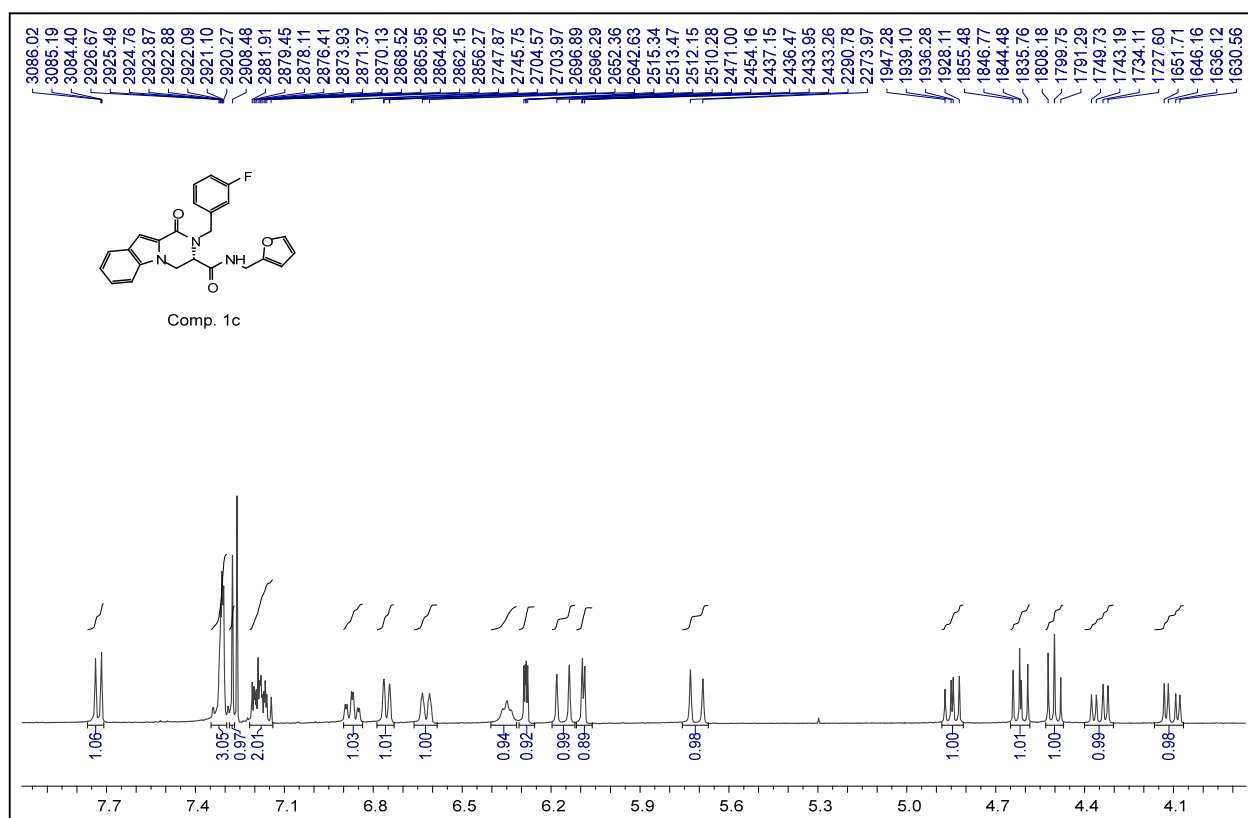

**<sup>13</sup>C NMR: (S)-N-(Furan-2-ylmethyl)-2-(3-fluorobenzyl)-1-oxo-1,2,3,4-tetrahydropyrazino[1,2-a]indole-3-carboxamide (1c)**

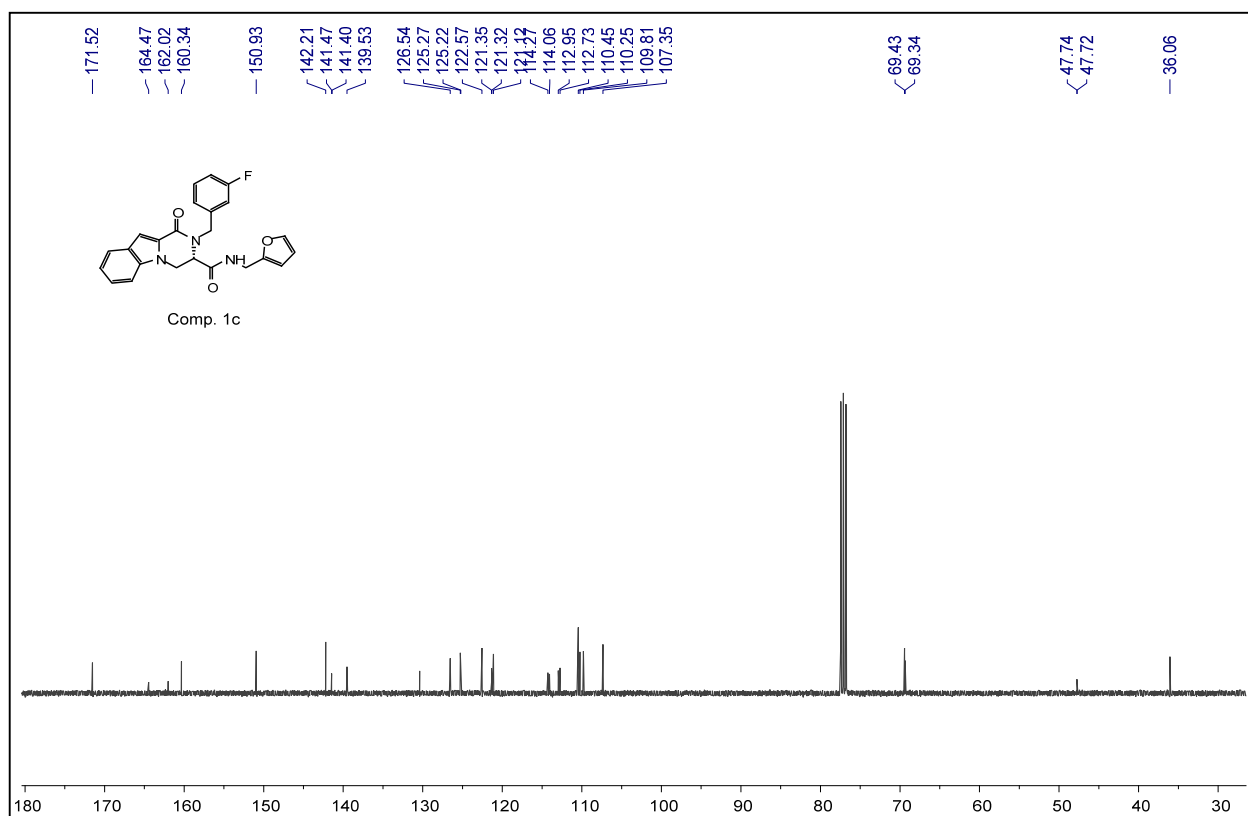

**<sup>1</sup>H NMR: (S)-N-(Furan-2-ylmethyl)-2-(4-fluorobenzyl)-1-oxo-1,2,3,4-tetrahydropyrazino[1,2-a]indole-3-carboxamide (1d)**

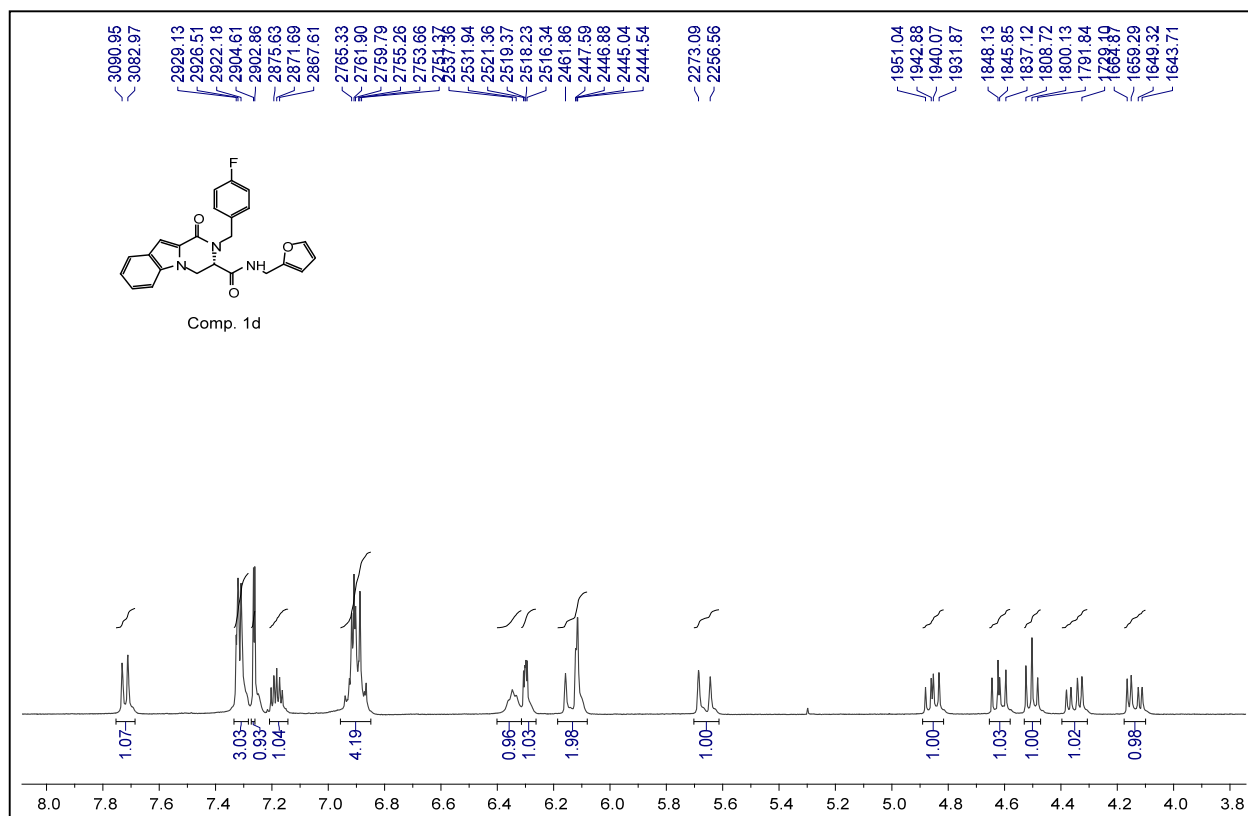

**<sup>13</sup>C NMR: (S)-N-(Furan-2-ylmethyl)-2-(4-fluorobenzyl)-1-oxo-1,2,3,4-tetrahydropyrazino[1,2-a]indole-3-carboxamide (1d)**

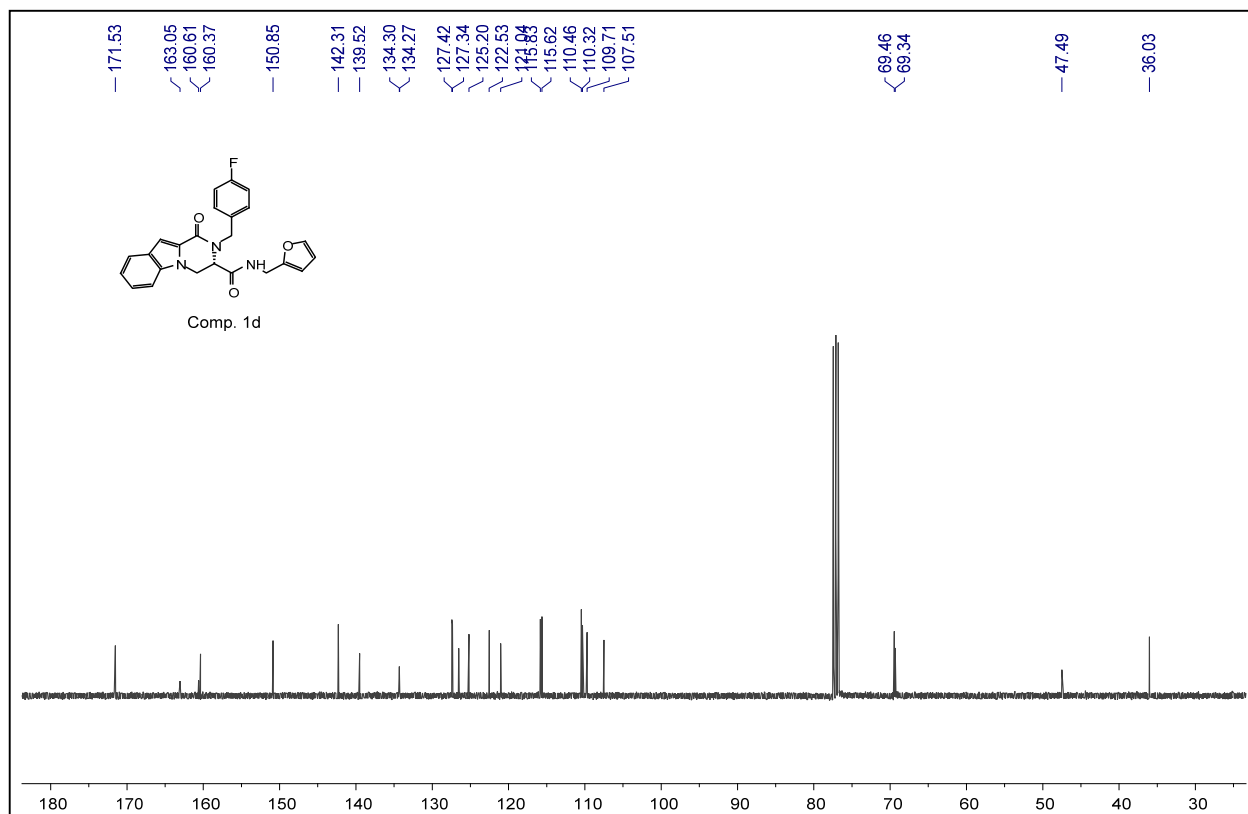

**<sup>1</sup>H NMR: (S)-N-(Furan-2-ylmethyl)-2-(3-cyanobenzyl)-1-oxo-1,2,3,4-tetrahydropyrazino[1,2-a]indole-3-carboxamide (1e)**

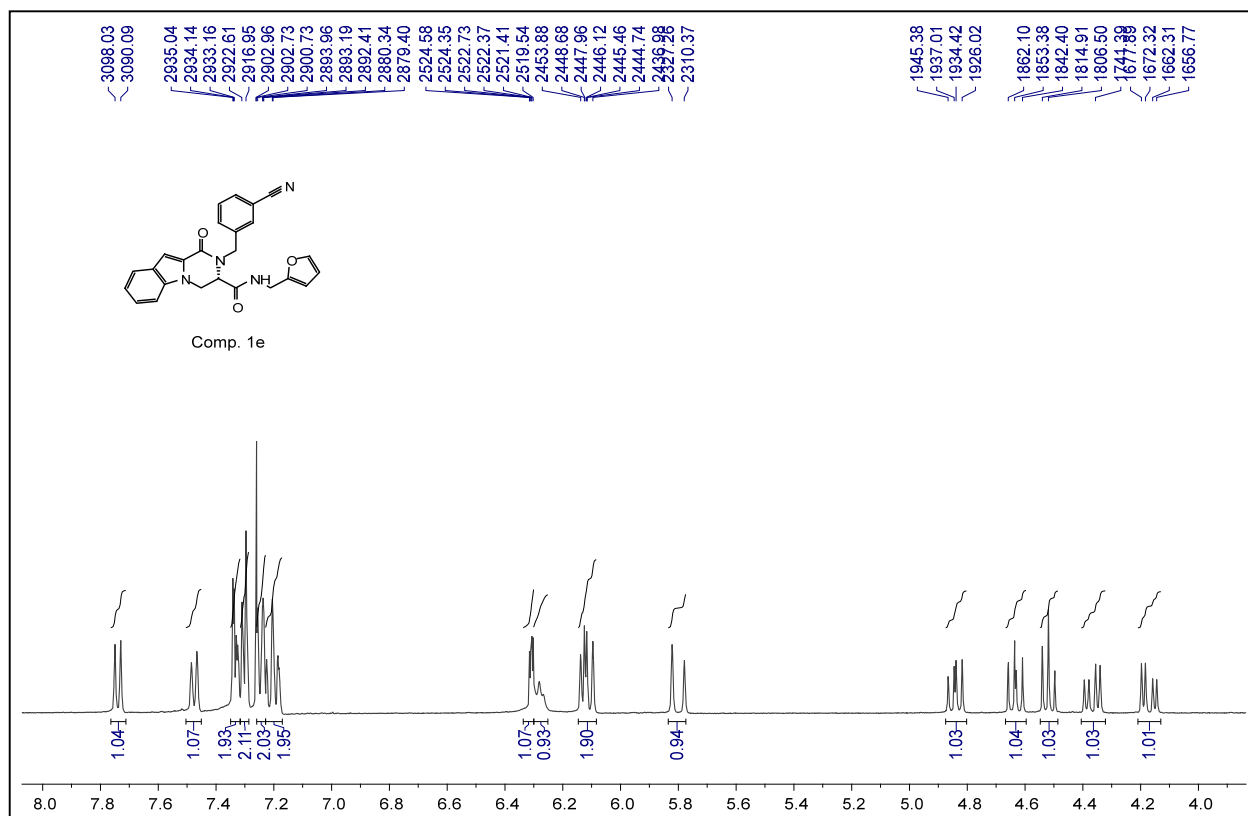

**<sup>13</sup>C NMR: (S)-N-(Furan-2-ylmethyl)-2-(3-cyanobenzyl)-1-oxo-1,2,3,4-tetrahydropyrazino[1,2-a]indole-3-carboxamide (1e)**

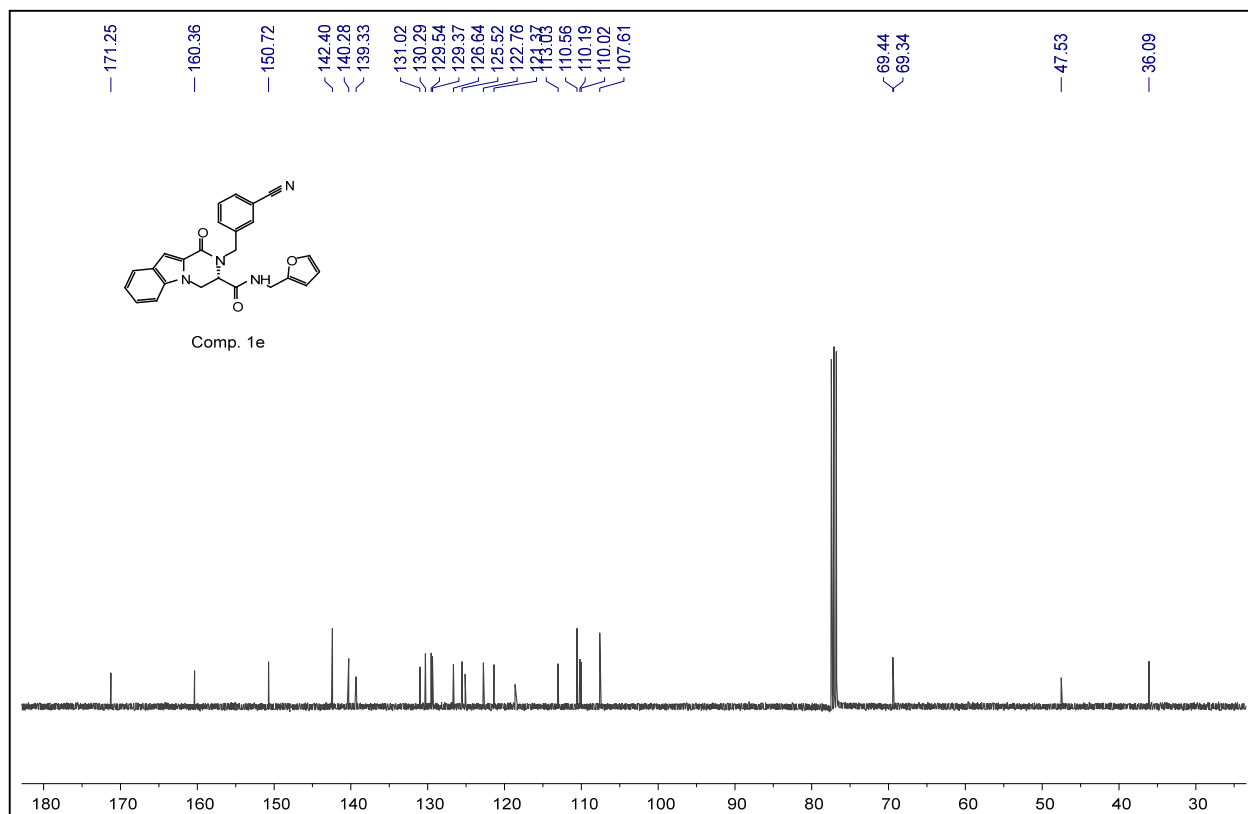

**<sup>1</sup>H NMR: (S)-N-(Furan-2-ylmethyl)-2-(4-cyanobenzyl)-1-oxo-1,2,3,4-tetrahydropyrazino[1,2-a]indole-3-carboxamide (1f)**

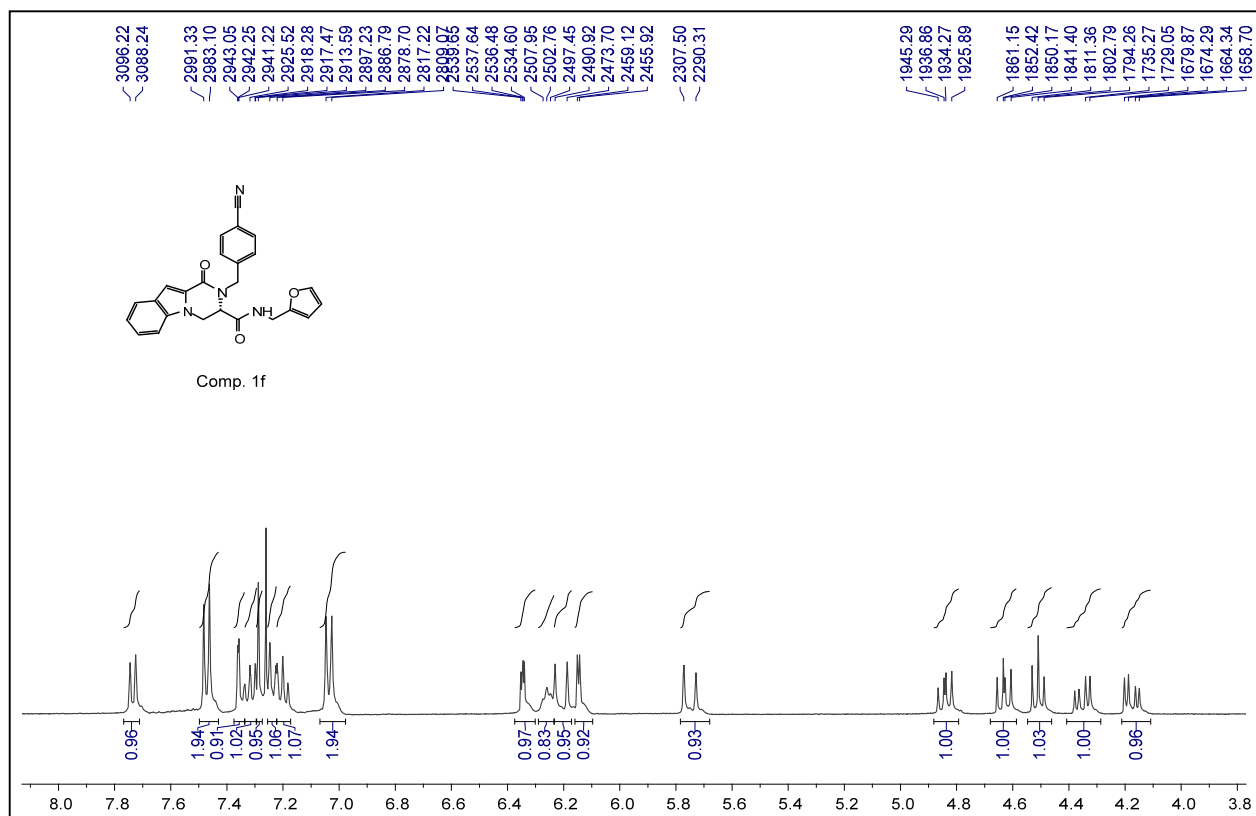

**<sup>13</sup>C NMR: (S)-N-(Furan-2-ylmethyl)-2-(4-cyanobenzyl)-1-oxo-1,2,3,4-tetrahydropyrazino[1,2-a]indole-3-carboxamide (1f)**

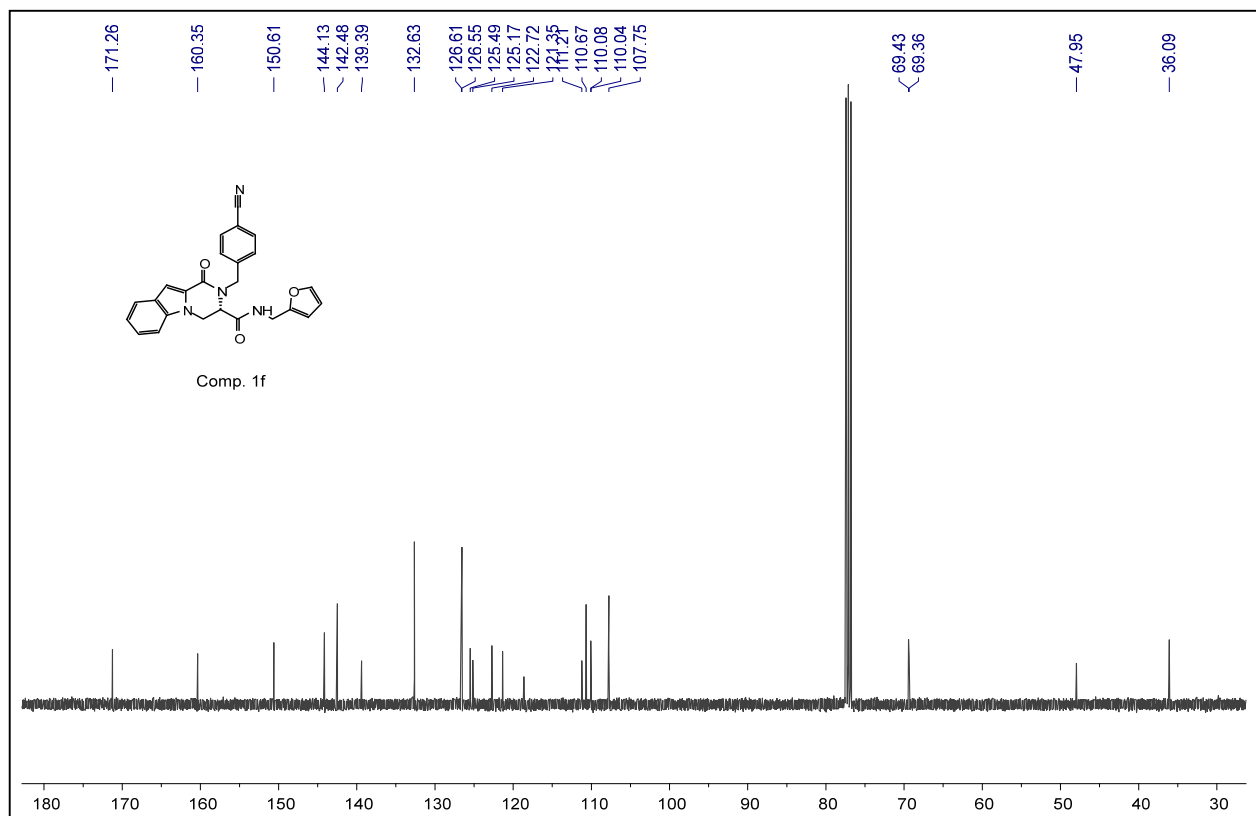

**<sup>1</sup>H NMR:** (*S*)-*N*-(Furan-2-ylmethyl)-2-(4-trifluoromethylbenzyl)-1-oxo-1,2,3,4-tetrahydropyrazino[1,2-*a*]indole-3-carboxamide (1g)

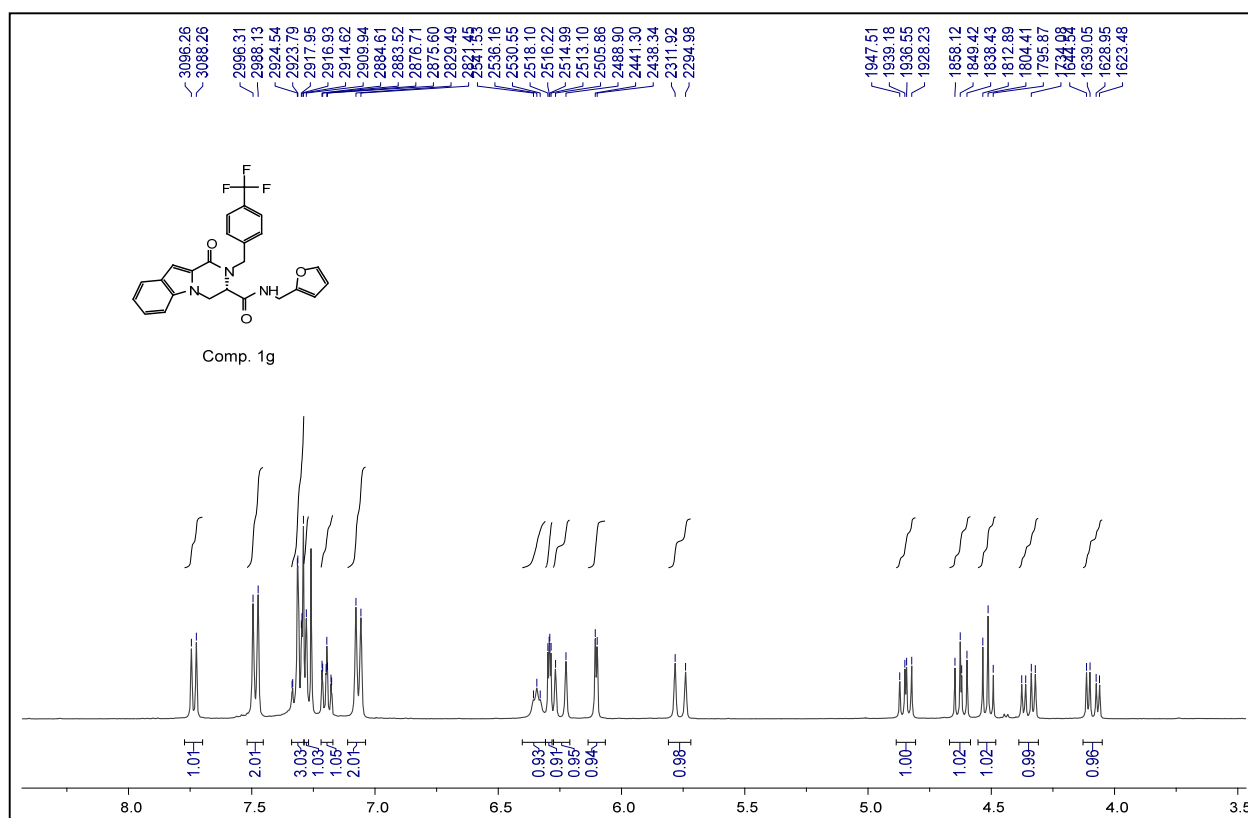

**<sup>13</sup>C NMR:** (*S*)-*N*-(Furan-2-ylmethyl)-2-(4-trifluoromethylbenzyl)-1-oxo-1,2,3,4-tetrahydropyrazino[1,2-*a*]indole-3-carboxamide (1g)

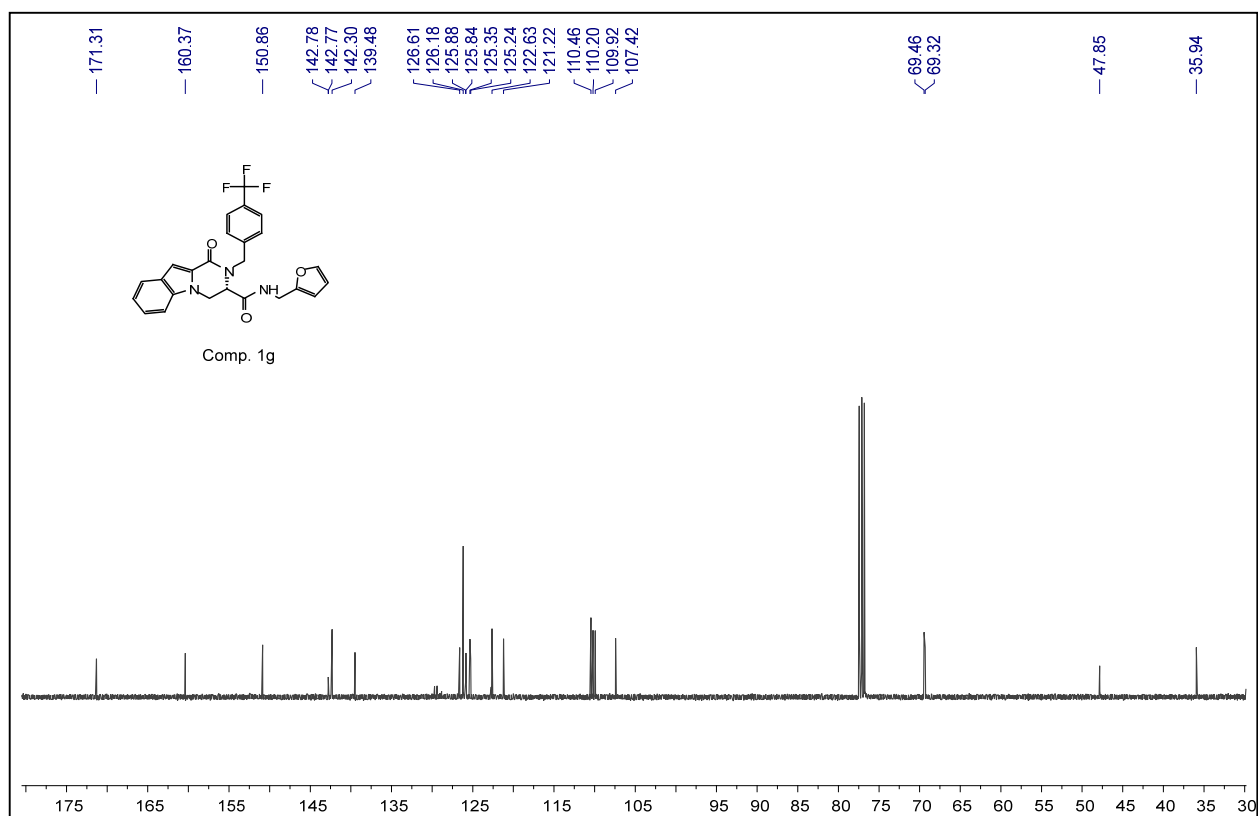

**<sup>1</sup>H NMR:** (*S*)-*N*-(Furan-2-ylmethyl)-2-(3-trifluoromethoxybenzyl)-1-oxo-1,2,3,4-tetrahydropyrazino[1,2-*a*]indole-3-carboxamide (1h)

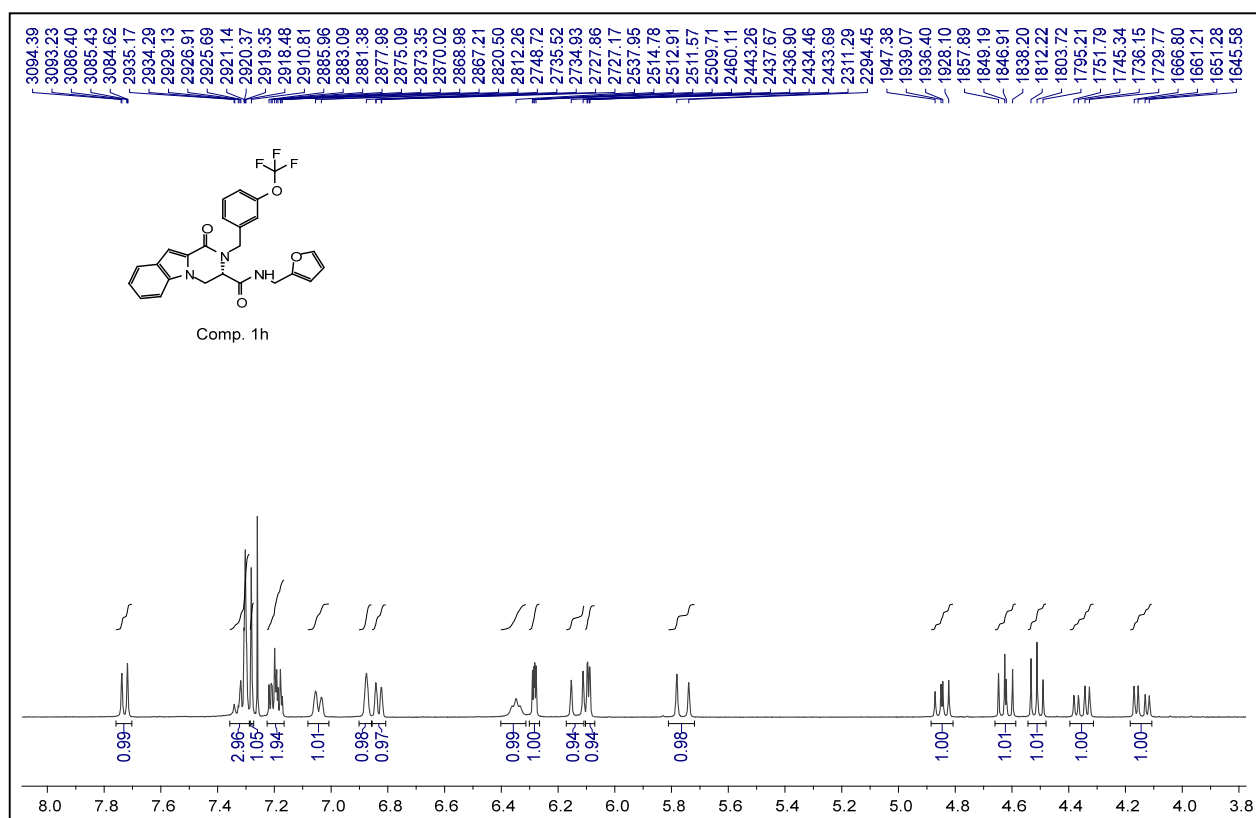

**<sup>13</sup>C NMR:** (*S*)-*N*-(Furan-2-ylmethyl)-2-(3-trifluoromethoxybenzyl)-1-oxo-1,2,3,4-tetrahydropyrazino[1,2-*a*]indole-3-carboxamide (1h)

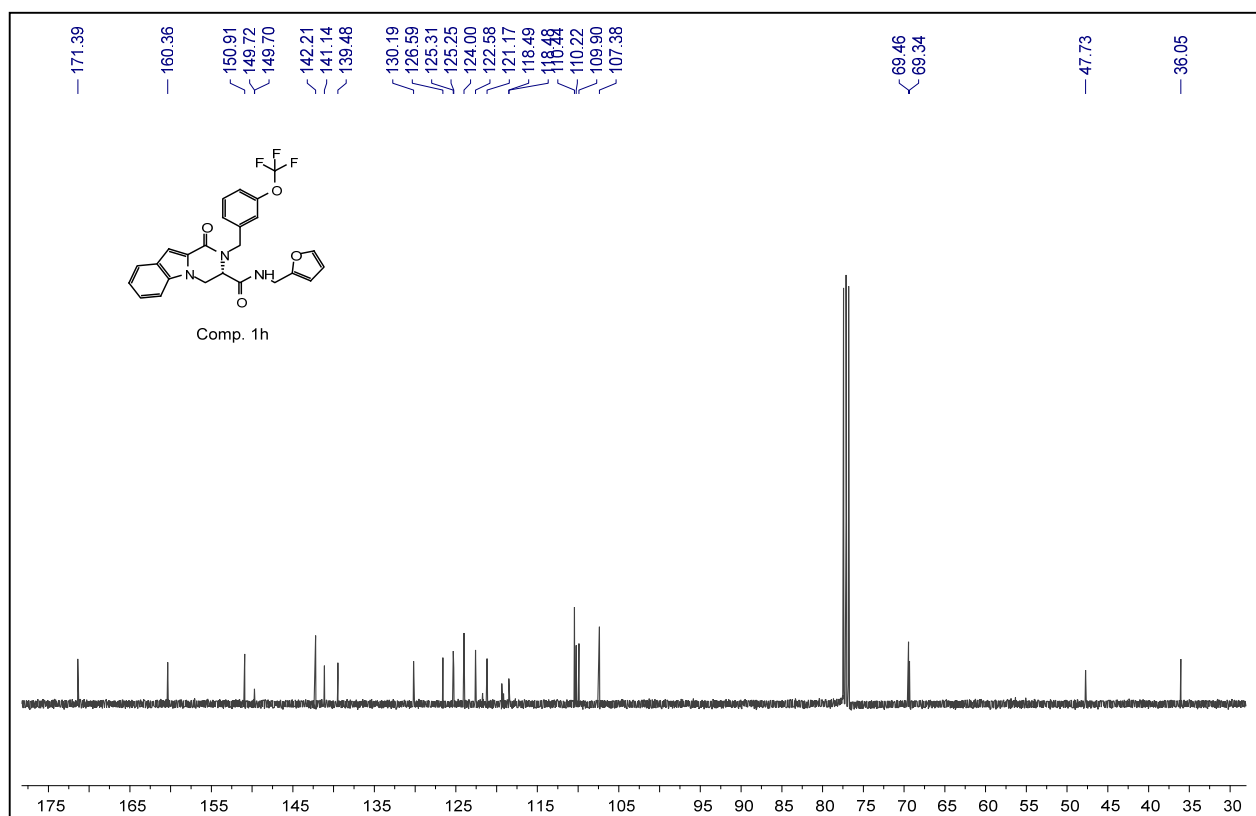

<sup>1</sup>H NMR: (*S*)-*N*-(Furan-2-ylmethyl)-2-(4-trifluoromethoxybenzyl)-1-oxo-1,2,3,4-tetrahydropyrazino[1,2-*a*]indole-3-carboxamide (1i)

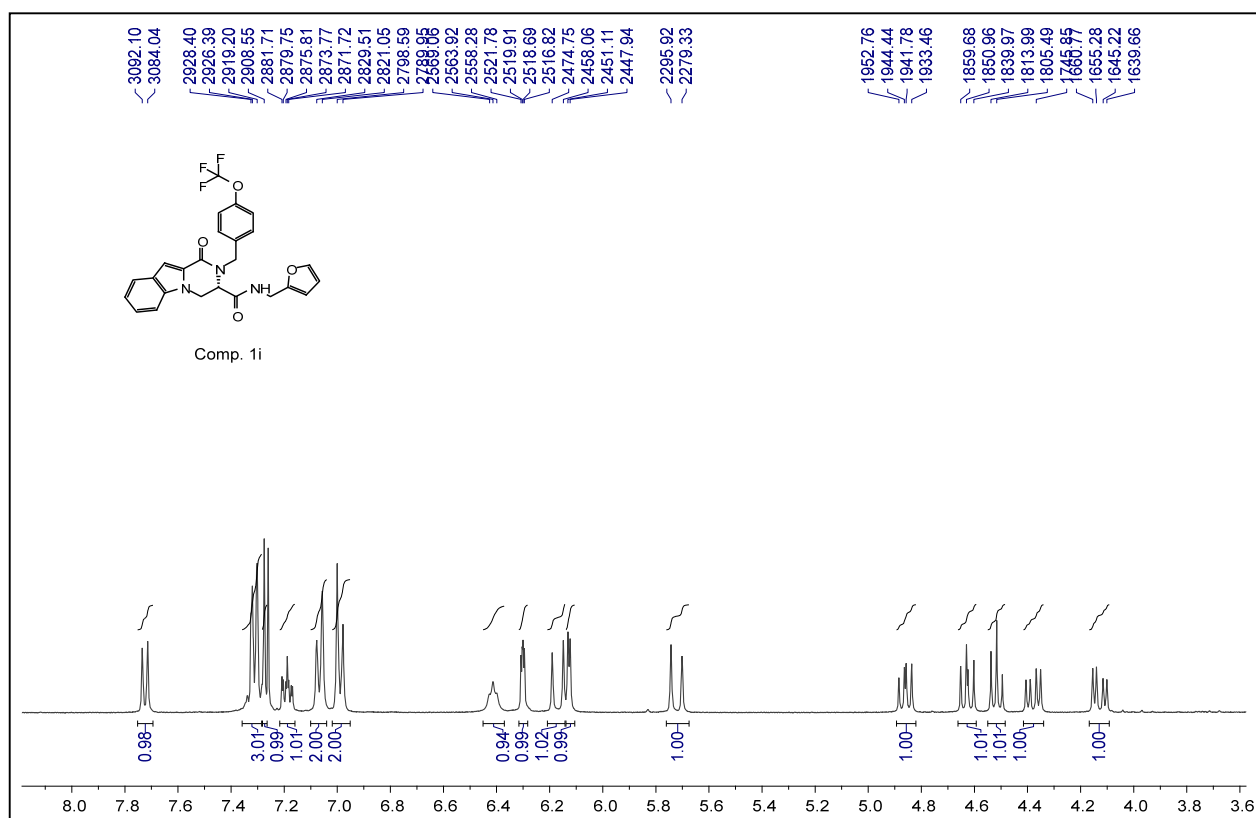

<sup>13</sup>C NMR: (*S*)-*N*-(Furan-2-ylmethyl)-2-(4-trifluoromethoxybenzyl)-1-oxo-1,2,3,4-tetrahydropyrazino[1,2-*a*]indole-3-carboxamide (1i)

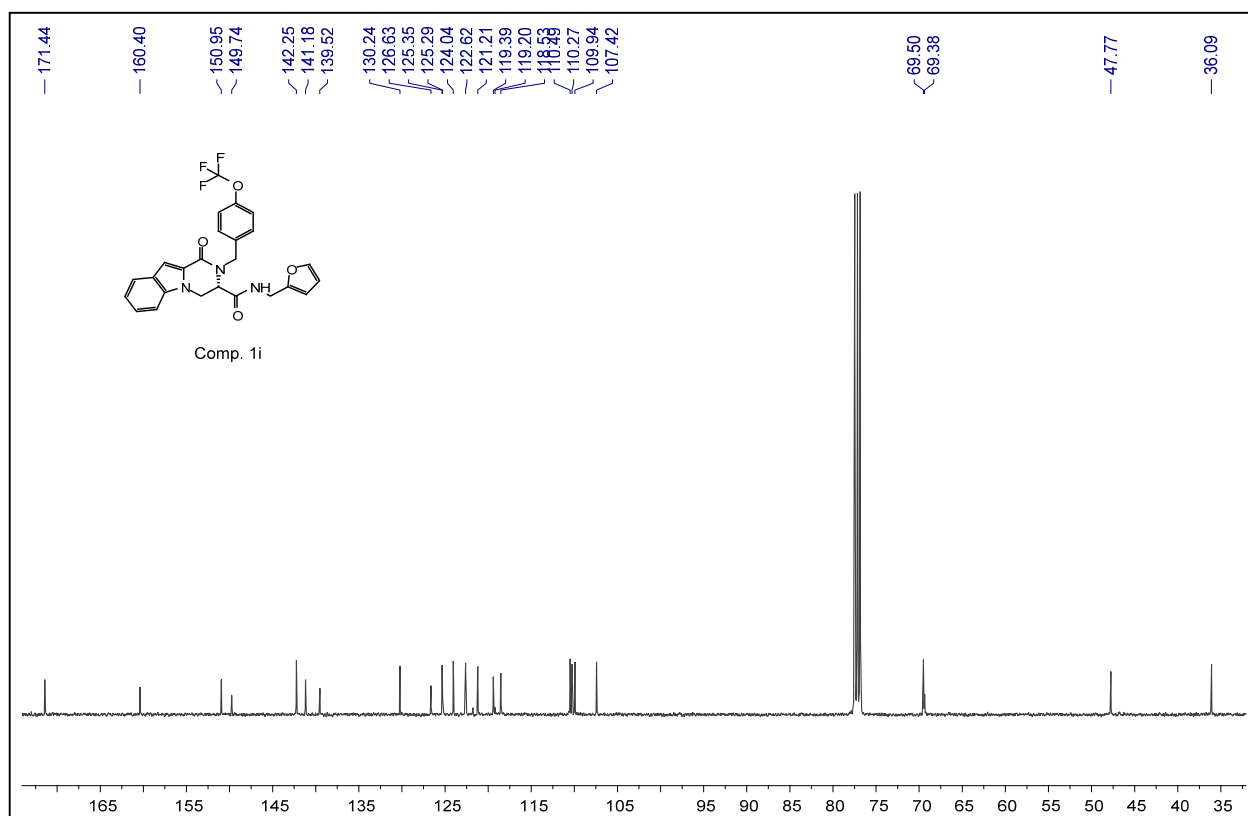

**<sup>1</sup>H NMR:** (*S*)-*N*-(Furan-2-ylmethyl)-2-(3-methylbenzyl)-1-oxo-1,2,3,4-tetrahydropyrazino[1,2-*a*]indole-3-carboxamide (1j)

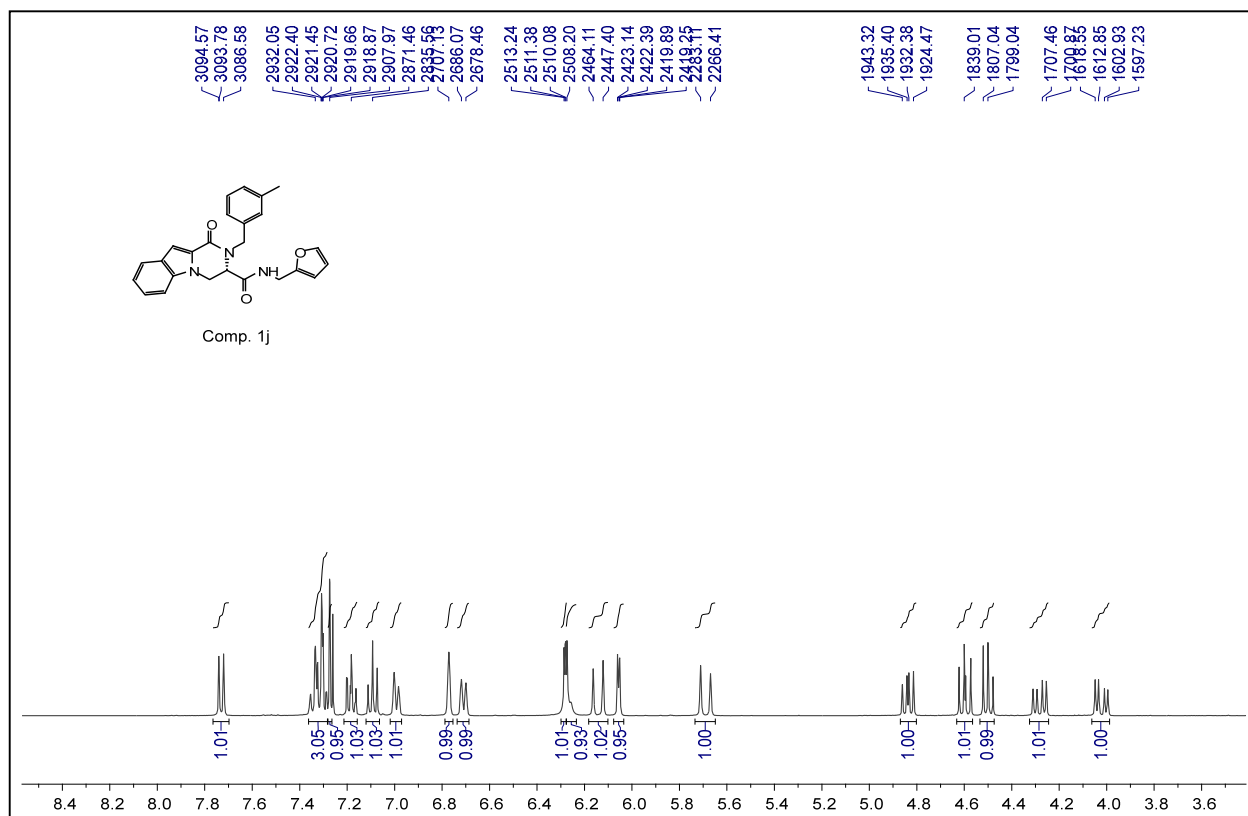

**<sup>13</sup>C NMR:** (*S*)-*N*-(Furan-2-ylmethyl)-2-(3-methylbenzyl)-1-oxo-1,2,3,4-tetrahydropyrazino[1,2-*a*]indole-3-carboxamide (1j)

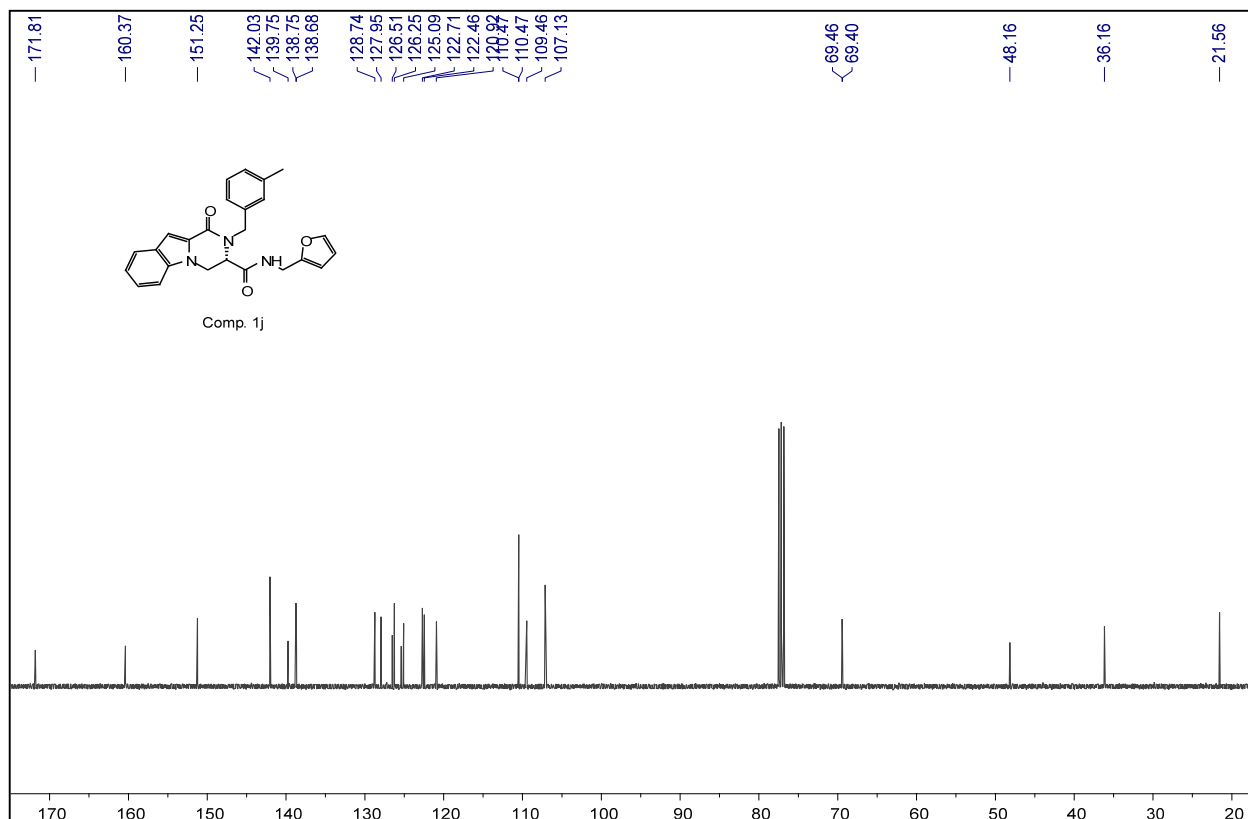



**<sup>1</sup>H NMR: (S)-N-(Furan-2-ylmethyl)-2-(4-methylbenzyl)-1-oxo-1,2,3,4-tetrahydropyrazino[1,2-a]indole-3-carboxamide (1k)**

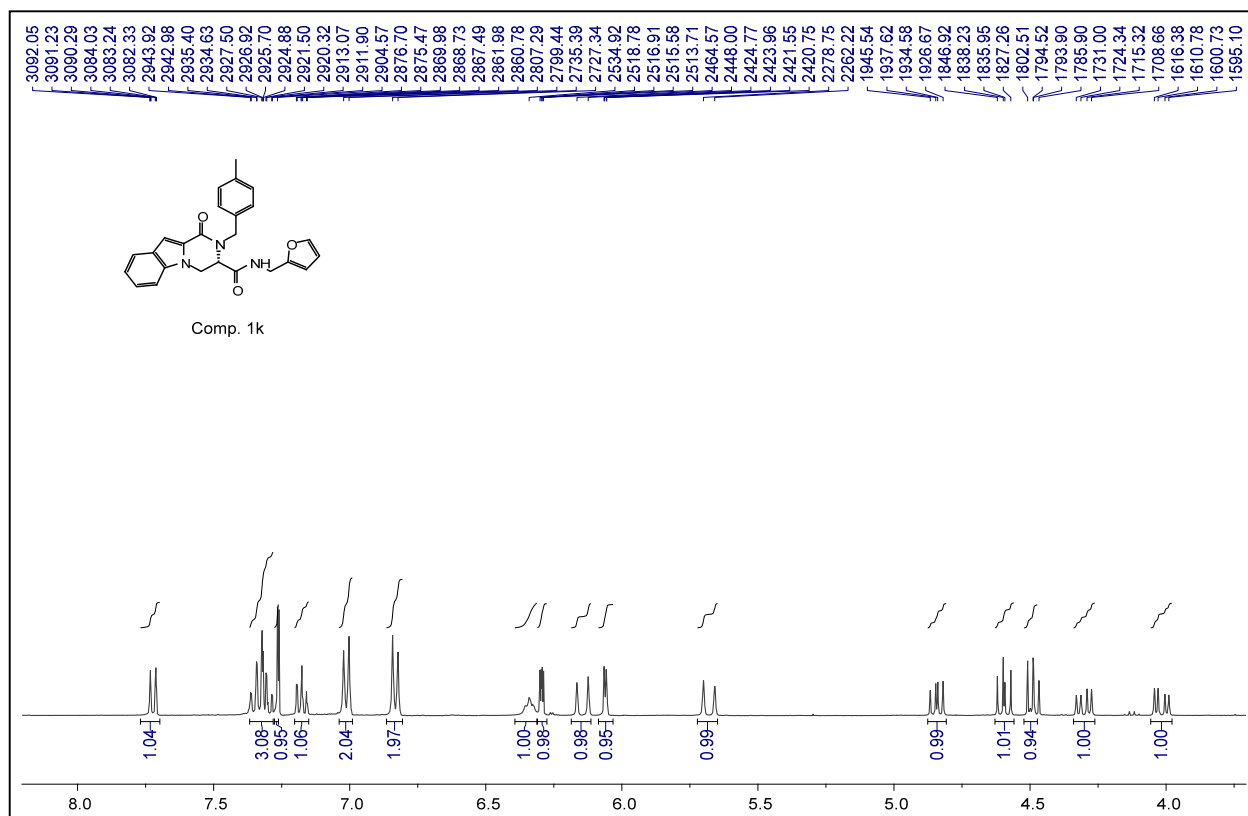

**<sup>13</sup>C NMR: (S)-N-(Furan-2-ylmethyl)-2-(4-methylbenzyl)-1-oxo-1,2,3,4-tetrahydropyrazino[1,2-a]indole-3-carboxamide (1k)**

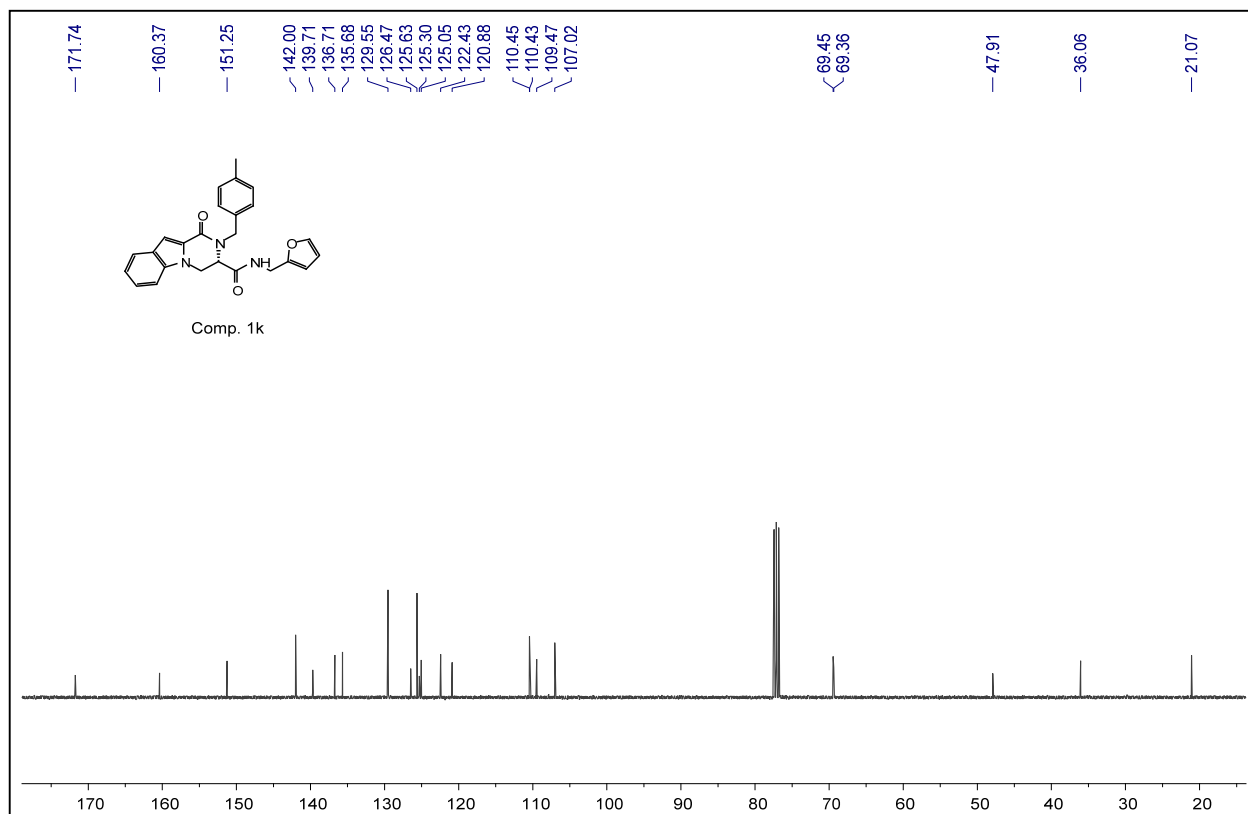

**<sup>1</sup>H NMR: (S)-N-(Furan-2-ylmethyl)-2-(naphthalen-1-ylmethyl)-1-oxo-1,2,3,4-tetrahydropyrazino[1,2-a]indole-3-carboxamide (11)**

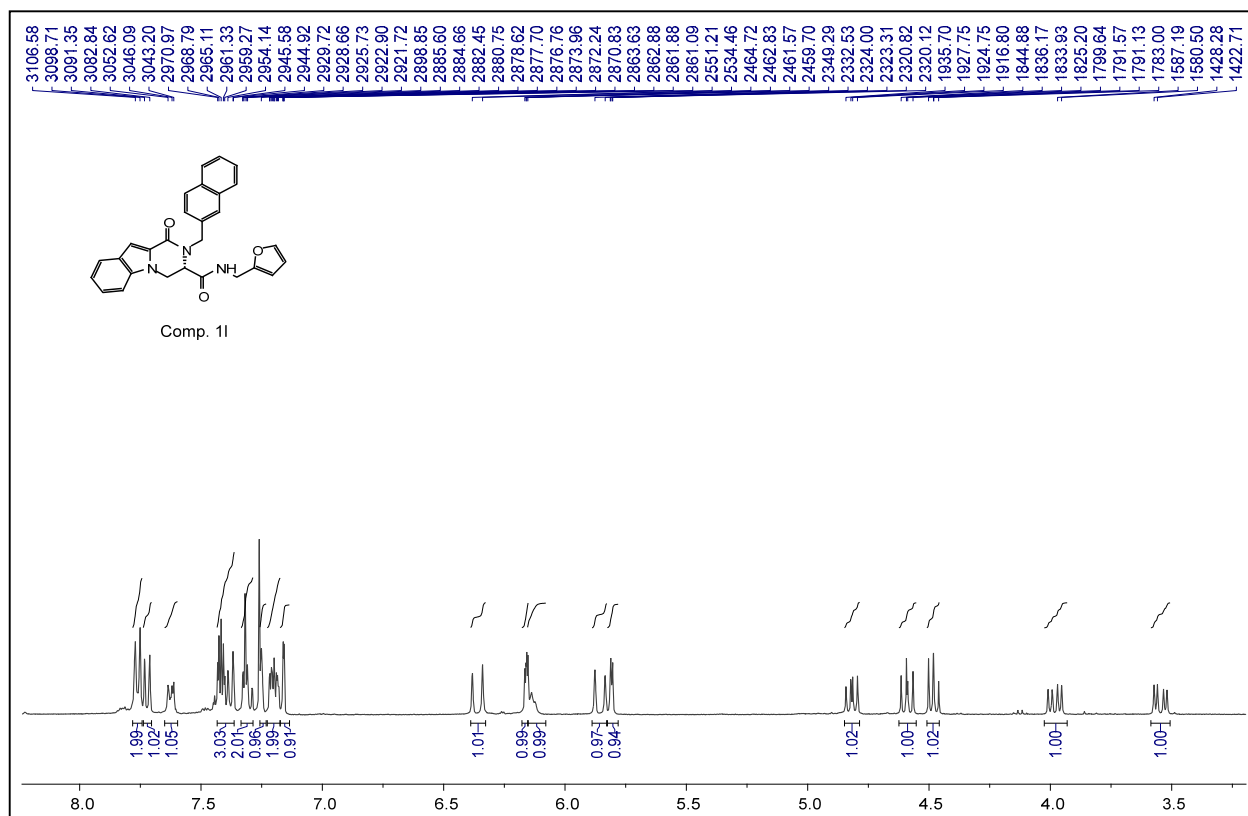

**<sup>13</sup>C NMR: (S)-N-(Furan-2-ylmethyl)-2-(naphthalen-1-ylmethyl)-1-oxo-1,2,3,4-tetrahydropyrazino[1,2-a]indole-3-carboxamide (11)**

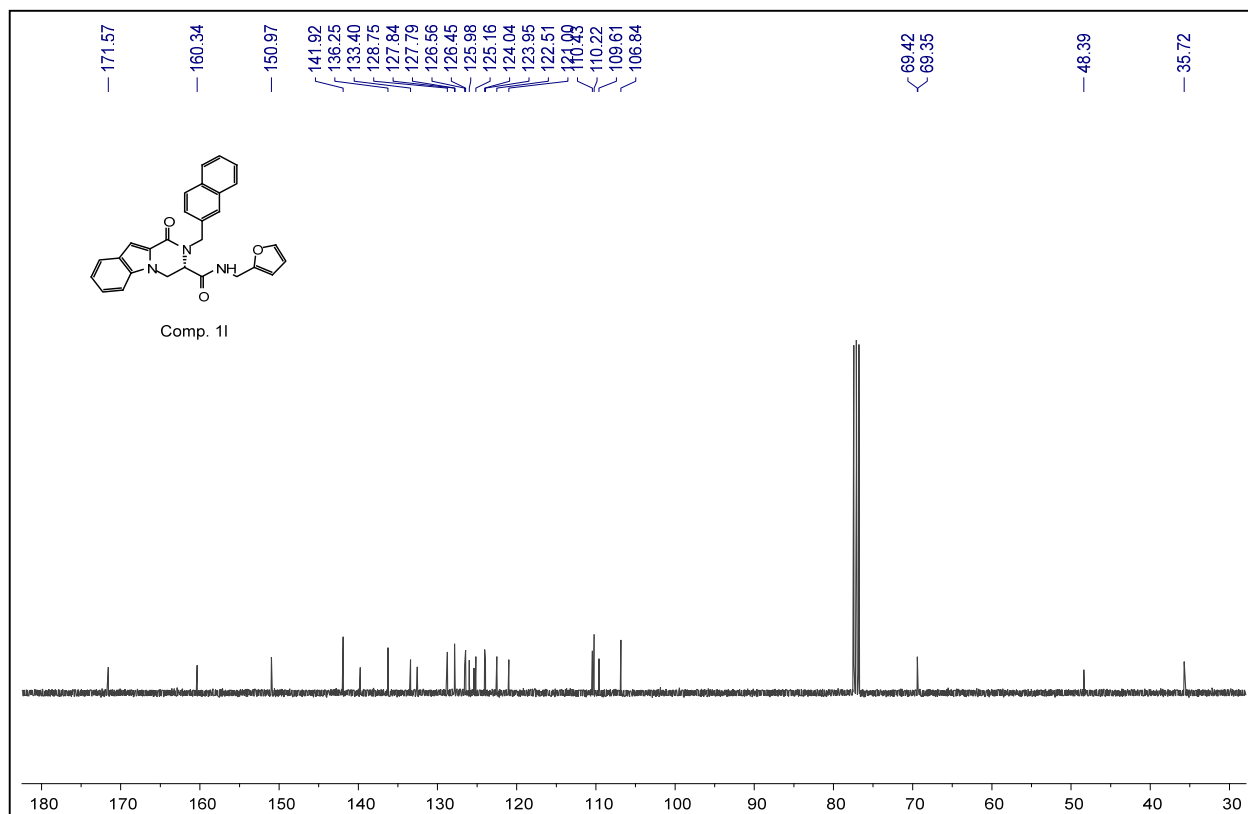

<sup>1</sup>H NMR: (*S*)-*N*-(Furan-2-ylmethyl)-2-([1,1'-biphenyl]-4-ylmethyl)-1-oxo-1,2,3,4-tetrahydropyrazino[1,2-*a*]indole-3-carboxamide (1m)

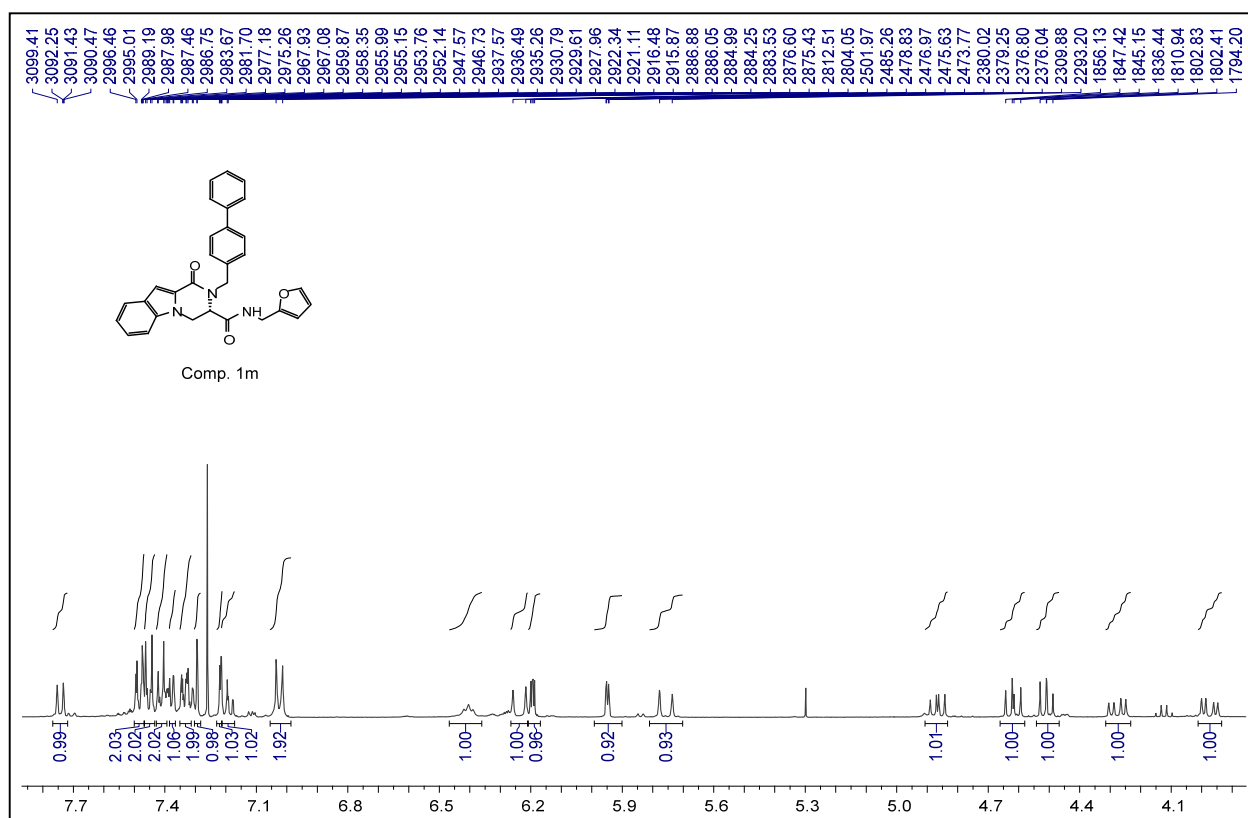

<sup>13</sup>C NMR: (*S*)-*N*-(Furan-2-ylmethyl)-2-([1,1'-biphenyl]-4-ylmethyl)-1-oxo-1,2,3,4-tetrahydropyrazino[1,2-*a*]indole-3-carboxamide (1m)

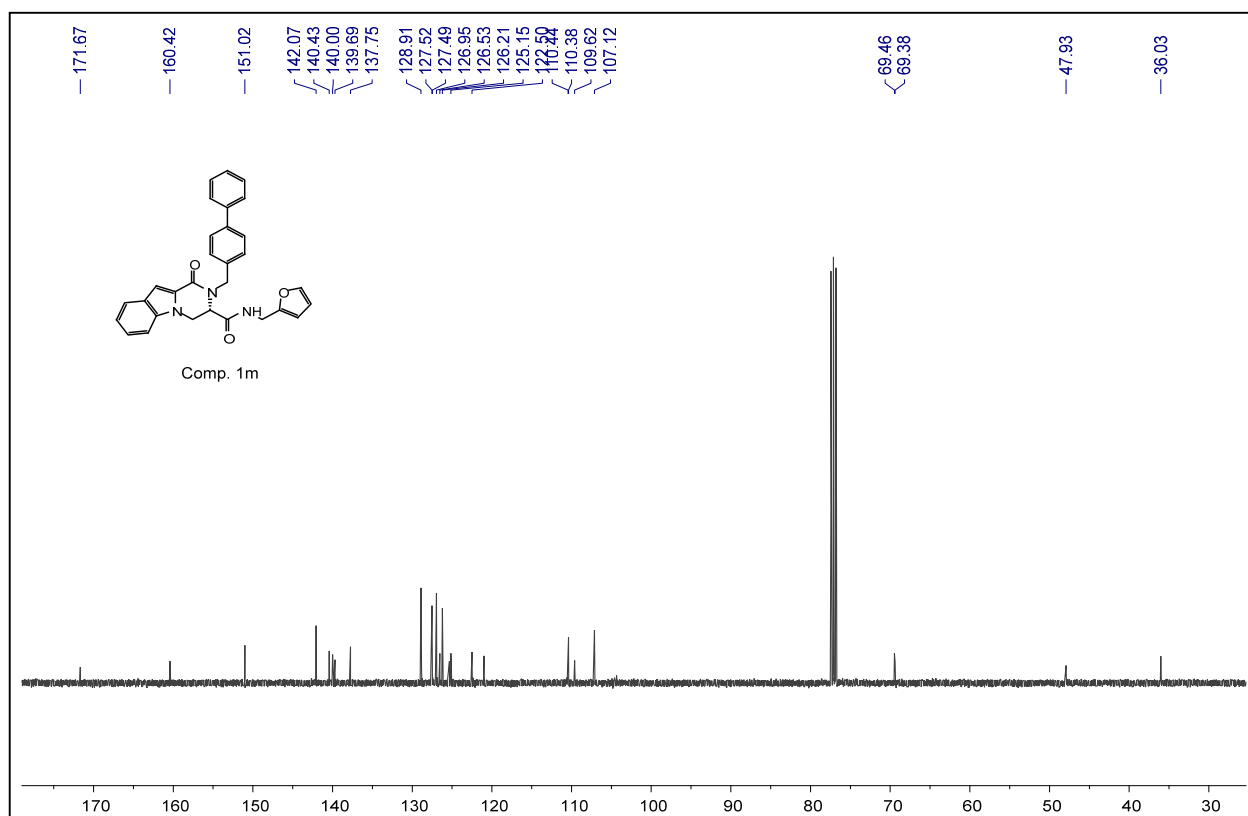

**<sup>1</sup>H NMR: (S)-N-Benzyl-2-(3-nitrobenzyl)-1-oxo-1,2,3,4-tetrahydropyrazino[1,2-a]indole-3-carboxamide (2a)**

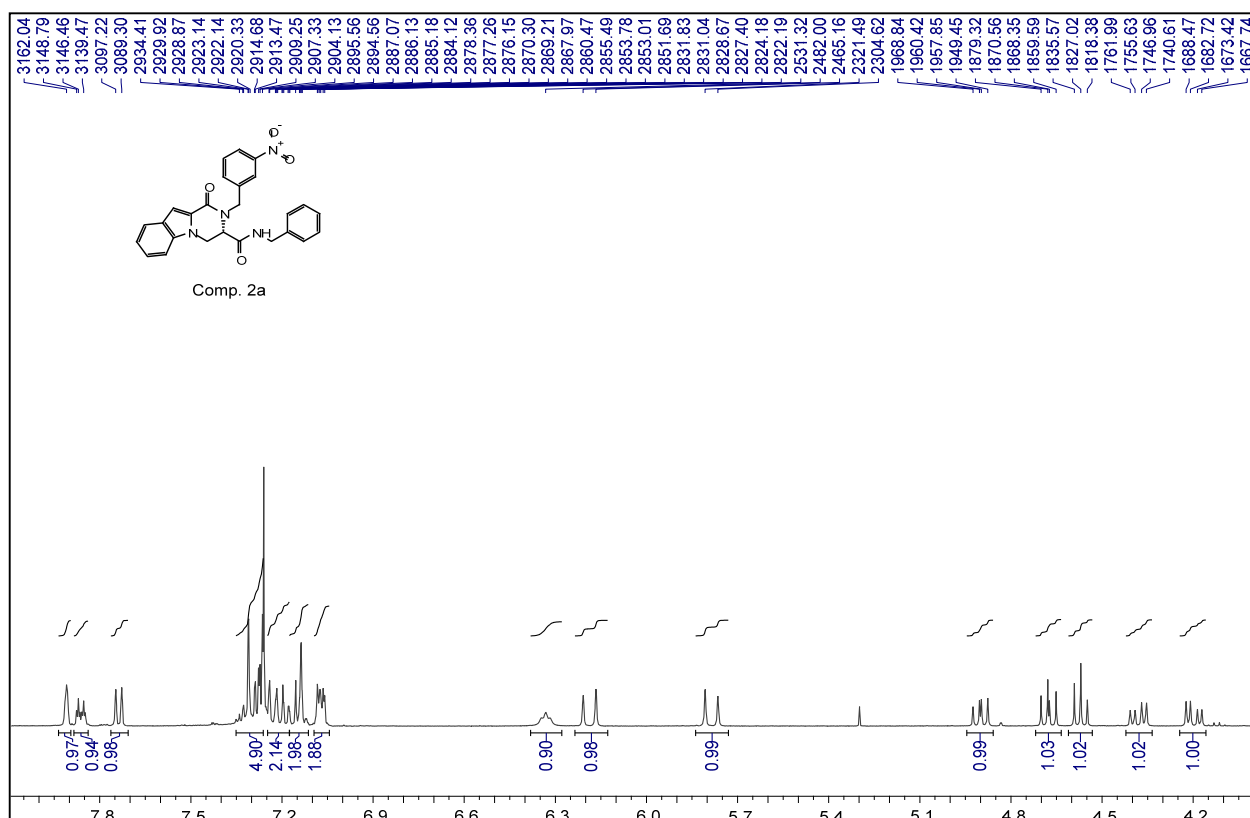

**<sup>13</sup>C NMR: (S)-N-Benzyl-2-(3-nitrobenzyl)-1-oxo-1,2,3,4-tetrahydropyrazino[1,2-a]indole-3-carboxamide (2a)**

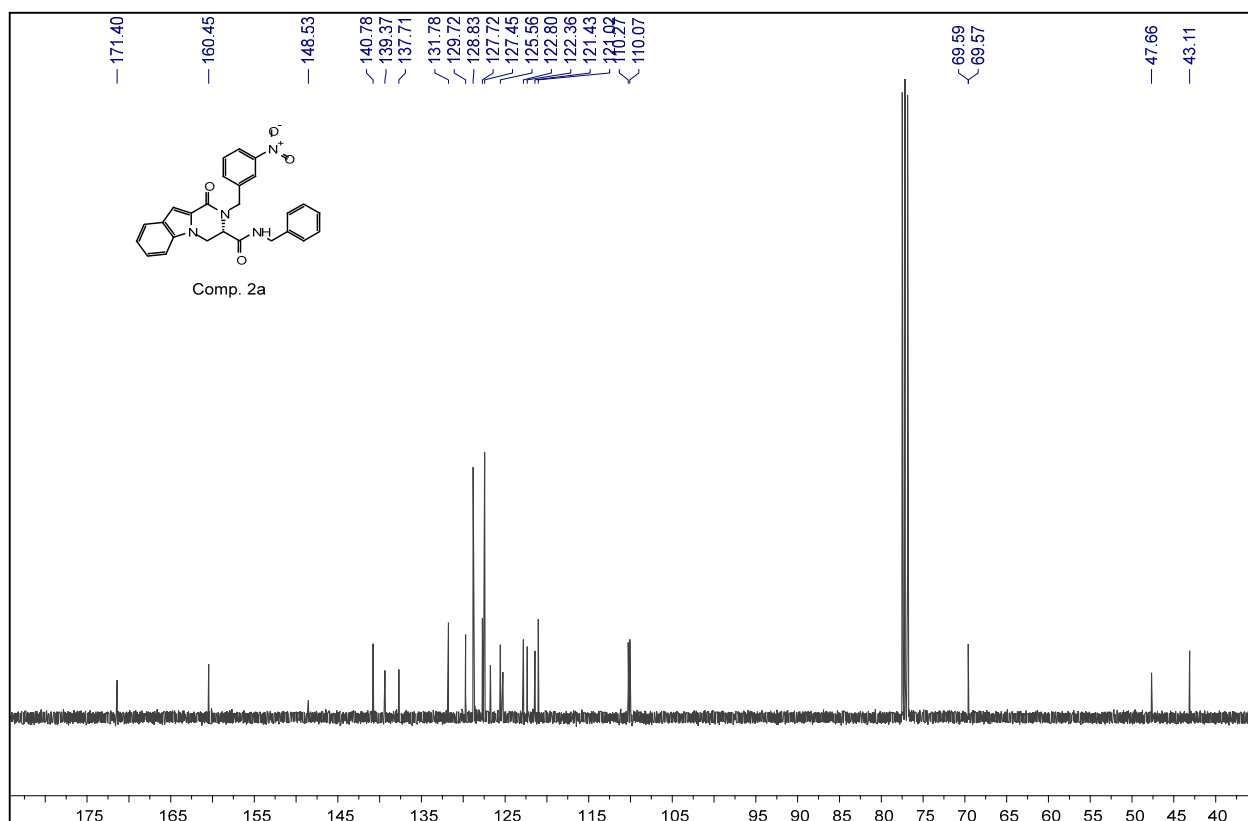

**<sup>1</sup>H NMR: (S)-N-Benzyl-2-(4-nitrobenzyl)-1-oxo-1,2,3,4-tetrahydropyrazino[1,2-a]indole-3-carboxamide (2b)**

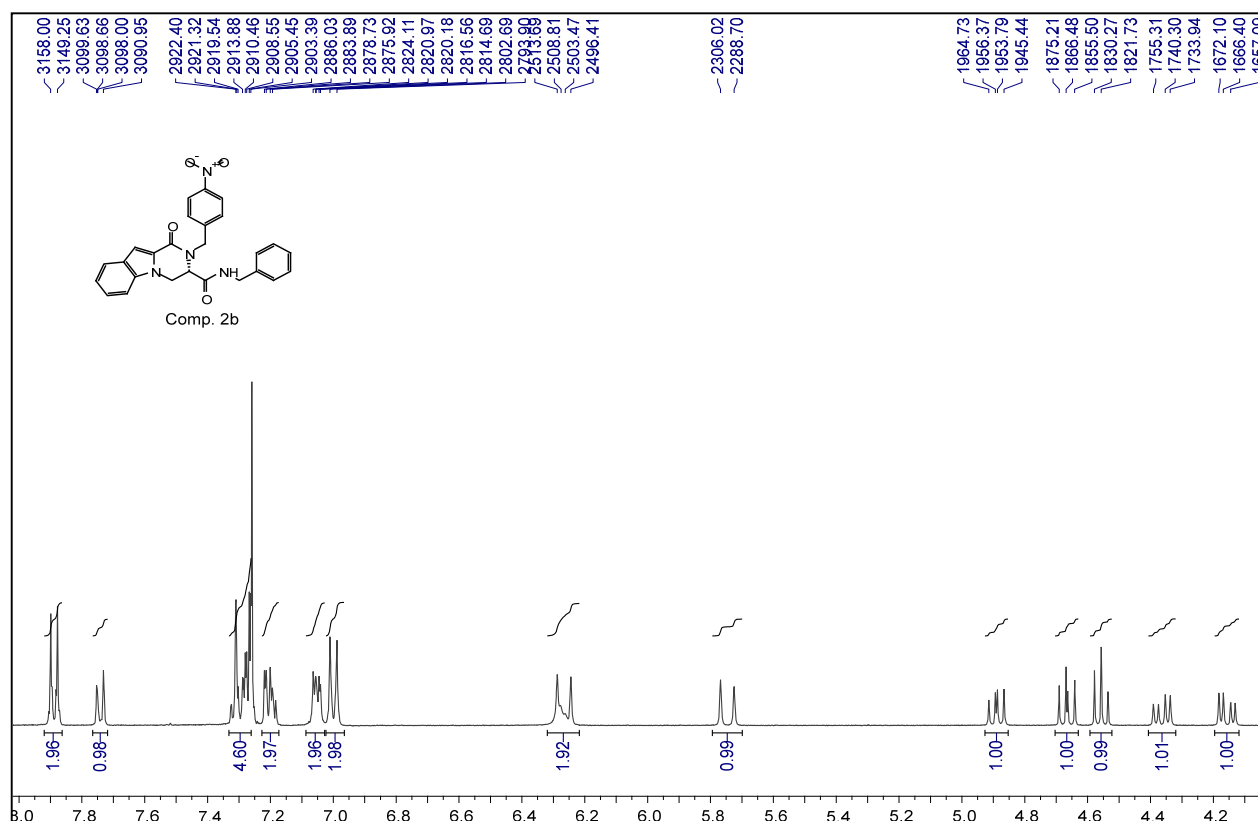

**<sup>13</sup>C NMR: (S)-N-Benzyl-2-(4-nitrobenzyl)-1-oxo-1,2,3,4-tetrahydropyrazino[1,2-a]indole-3-carboxamide (2b)**

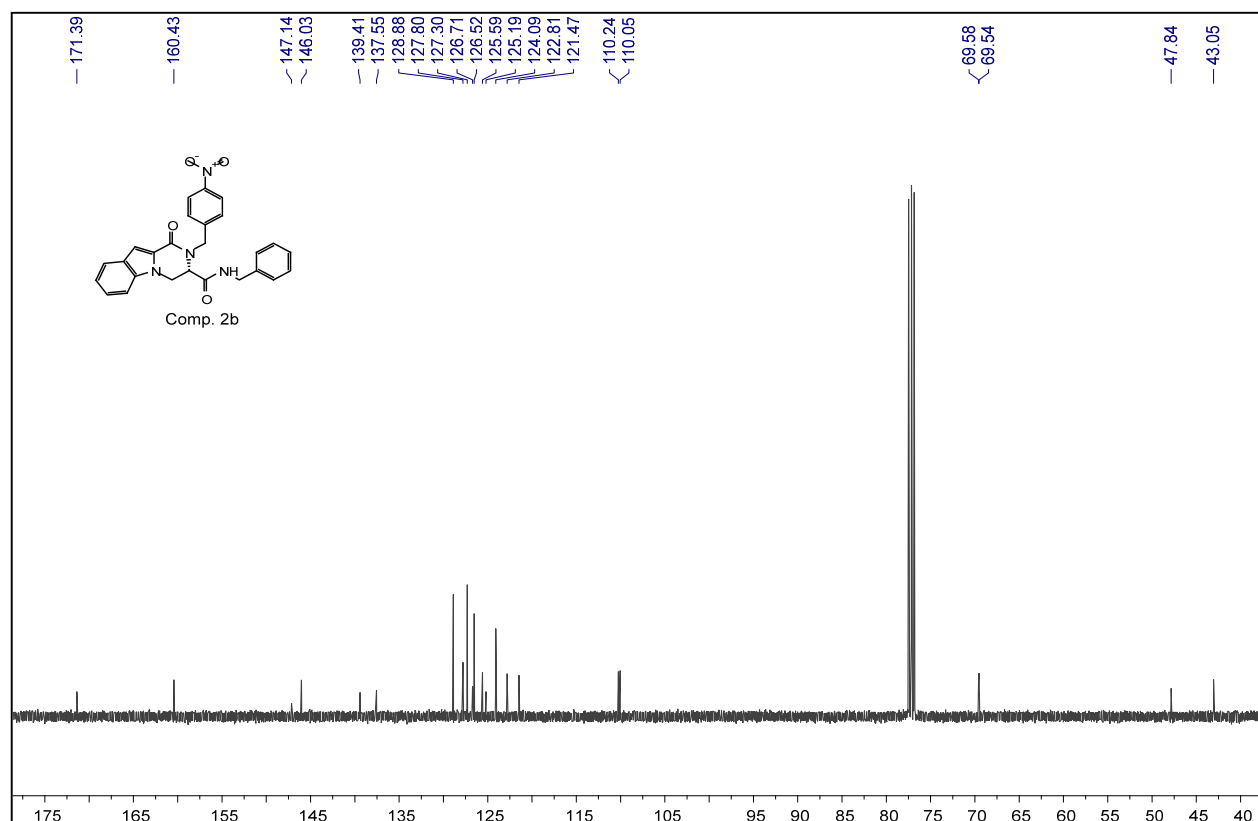

**<sup>1</sup>H NMR:** (*S*)-*N*-Benzyl-2-(3-fluorobenzyl)-1-oxo-1,2,3,4-tetrahydropyrazino[1,2-*a*]indole-3-carboxamide (2c)

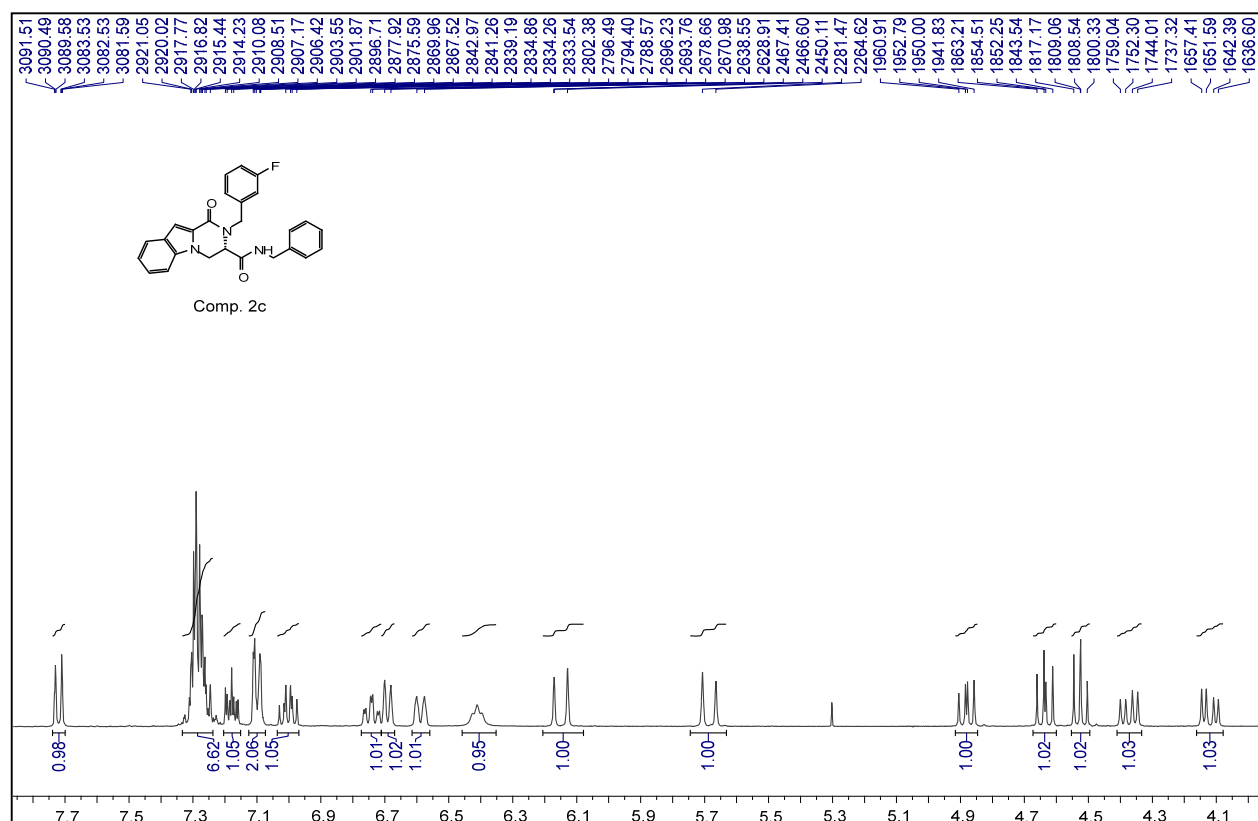

**<sup>13</sup>C NMR:** (*S*)-*N*-Benzyl-2-(3-fluorobenzyl)-1-oxo-1,2,3,4-tetrahydropyrazino[1,2-*a*]indole-3-carboxamide (2c)

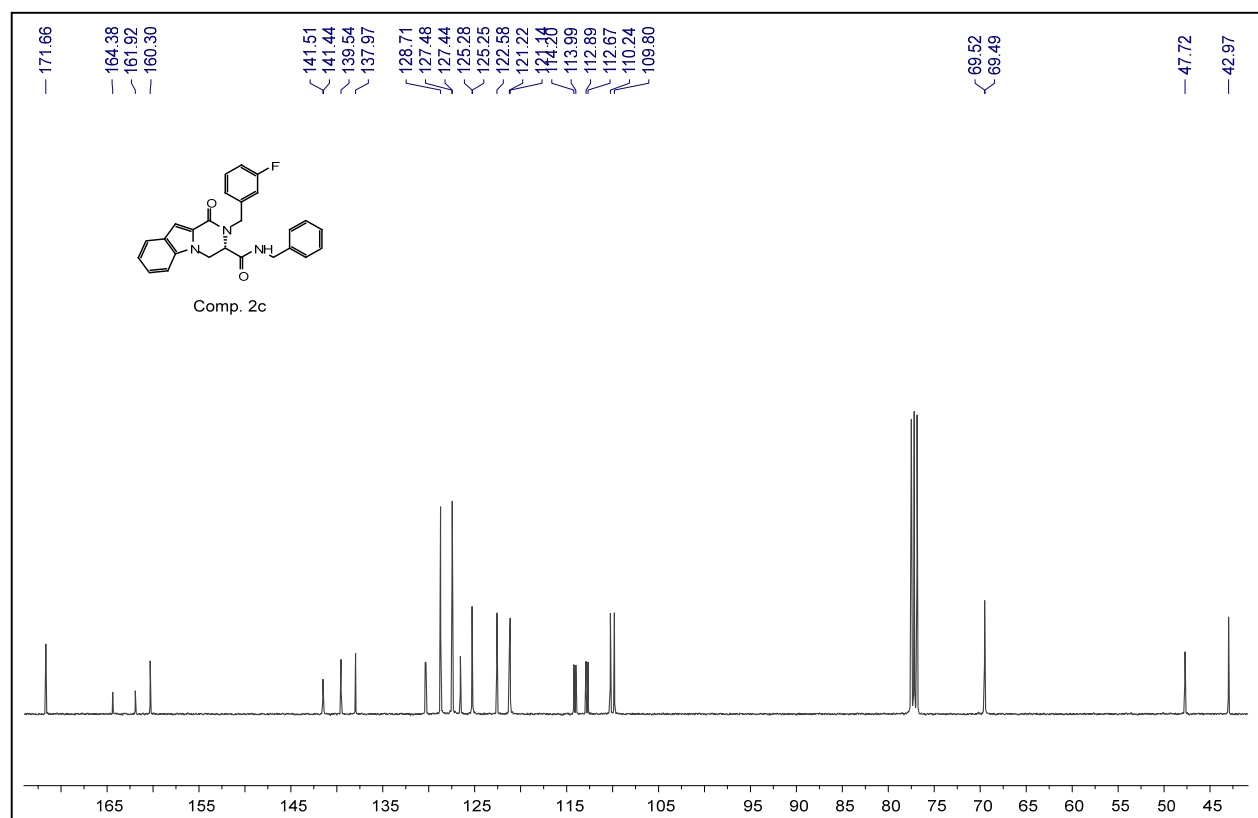

**<sup>1</sup>H NMR: (S)-N-Benzyl-2-(4-fluorobenzyl)-1-oxo-1,2,3,4-tetrahydropyrazino[1,2-a]indole-3-carboxamide (2d)**

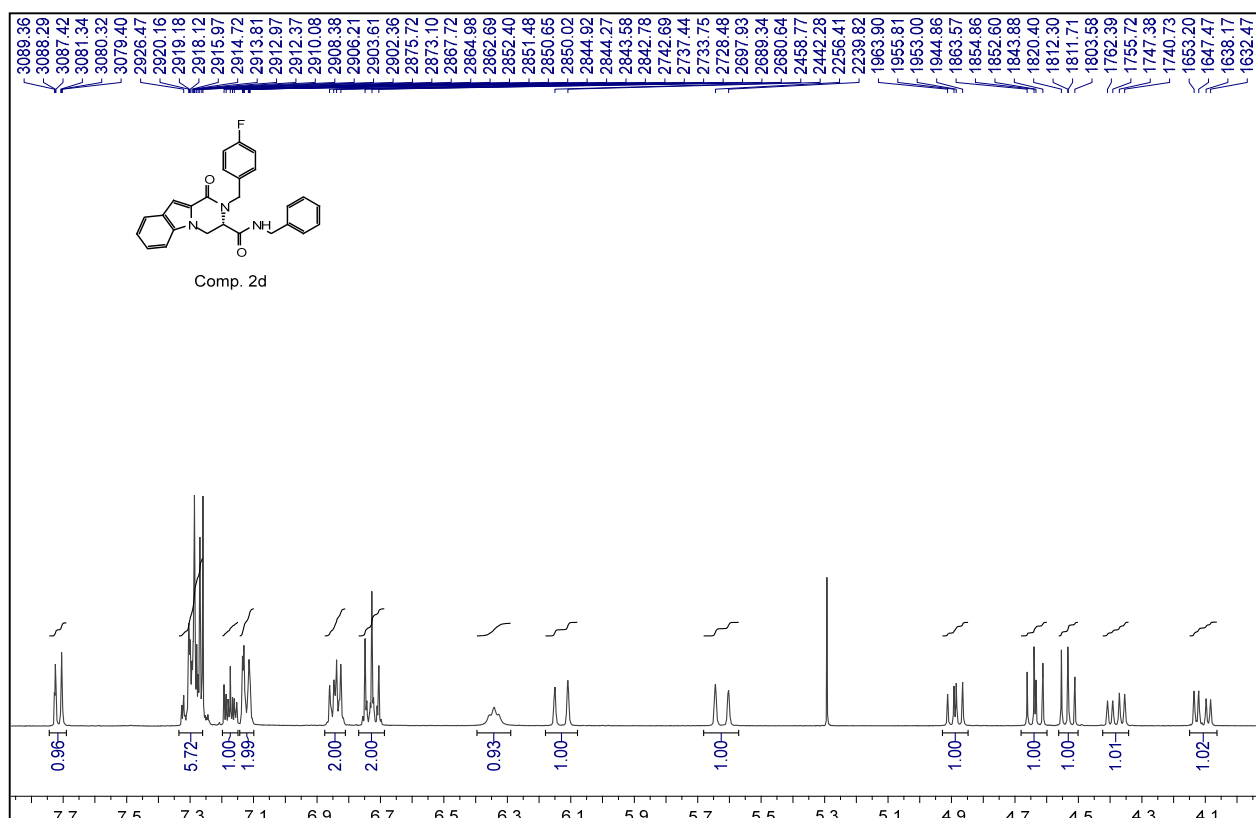

**<sup>13</sup>C NMR: (S)-N-Benzyl-2-(4-fluorobenzyl)-1-oxo-1,2,3,4-tetrahydropyrazino[1,2-a]indole-3-carboxamide (2d)**

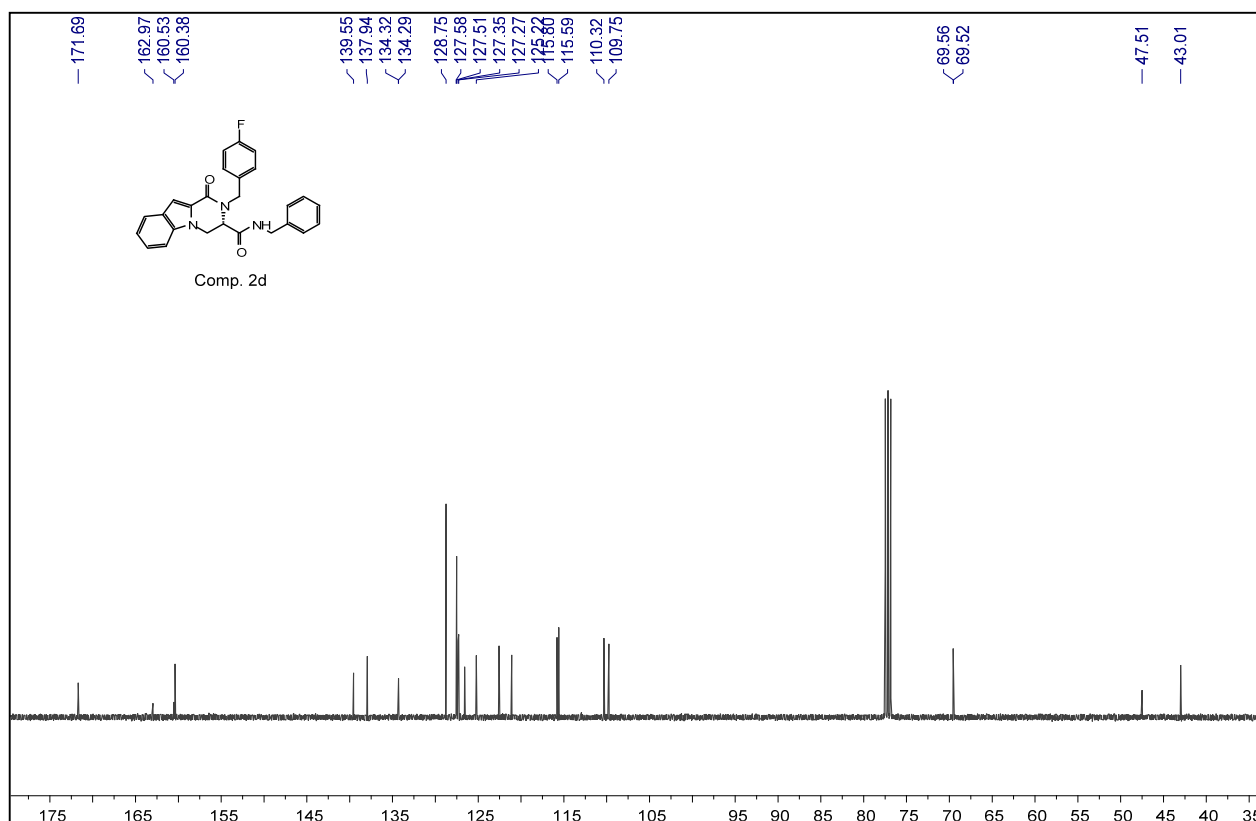

**<sup>1</sup>H NMR: (S)-N-Benzyl-2-(3-cyanobenzyl)-1-oxo-1,2,3,4-tetrahydropyrazino[1,2-*a*]indole-3-carboxamide (2e)**

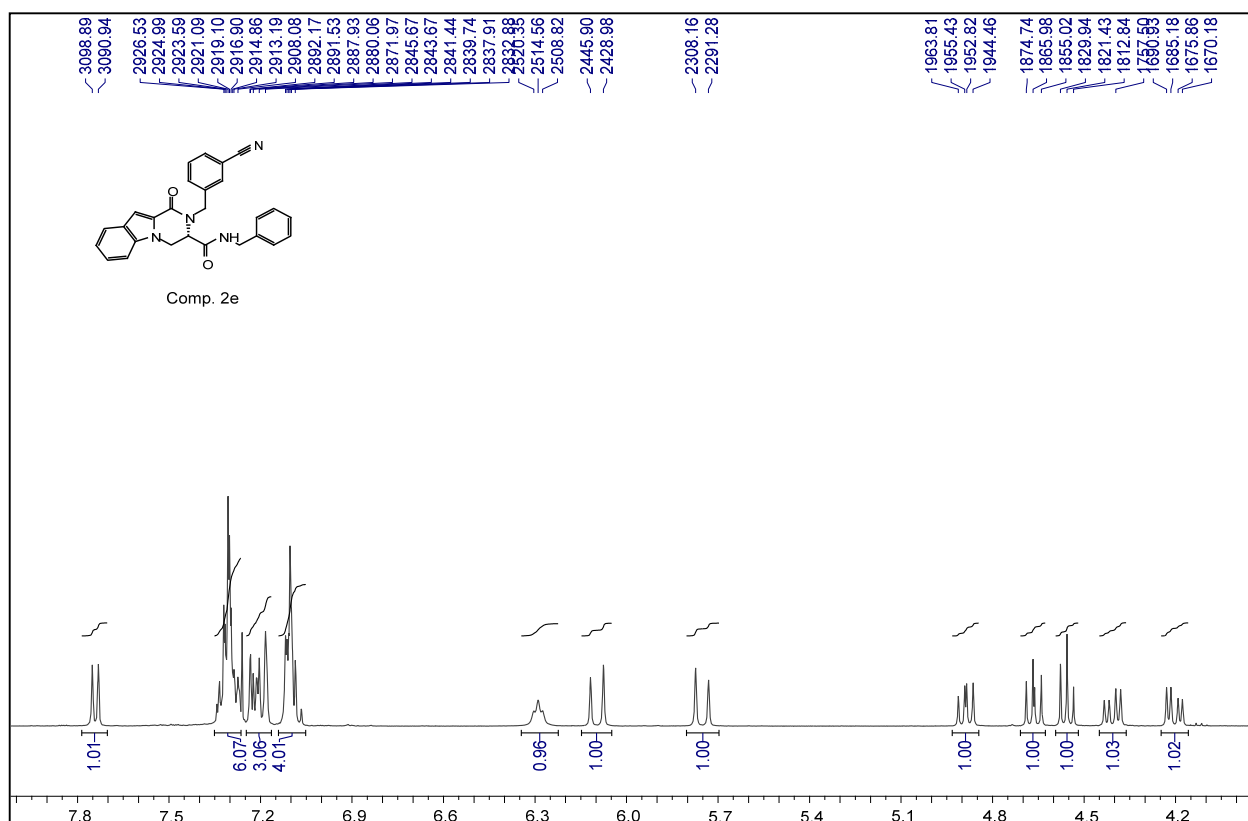

**<sup>13</sup>C NMR: (S)-N-Benzyl-2-(3-cyanobenzyl)-1-oxo-1,2,3,4-tetrahydropyrazino[1,2-*a*]indole-3-carboxamide (2e)**

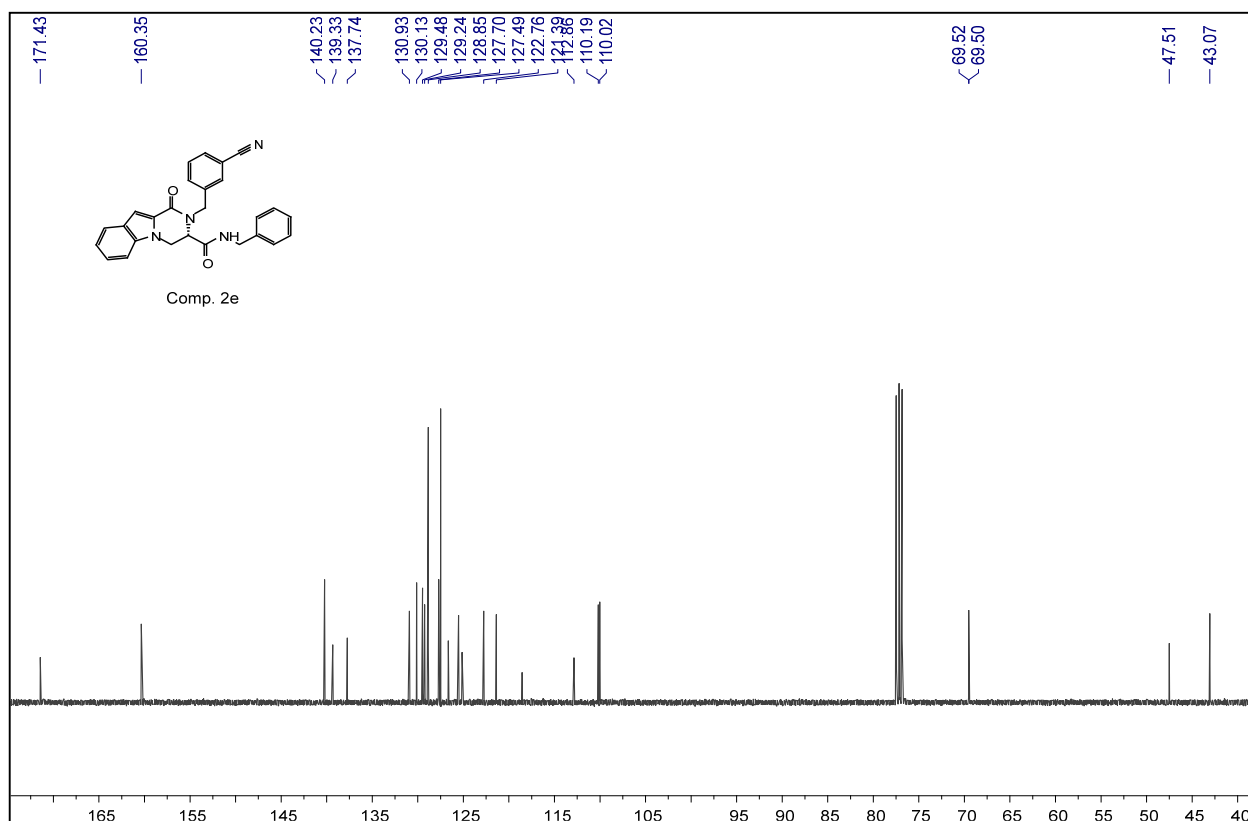



**<sup>1</sup>H NMR: (S)-N-Benzyl-2-(4-cyanobenzyl)-1-oxo-1,2,3,4-tetrahydropyrazino[1,2-a]indole-3-carboxamide (2f)**

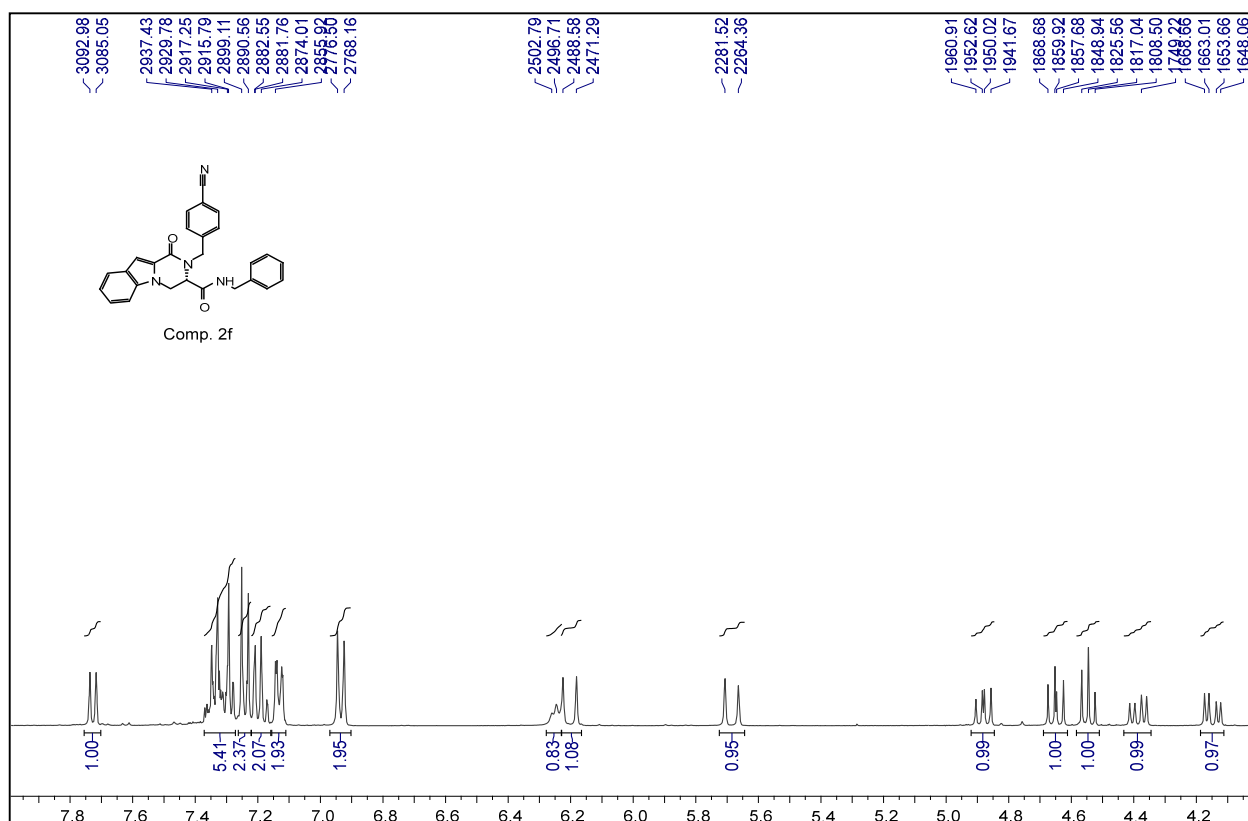

**<sup>13</sup>C NMR: (S)-N-Benzyl-2-(4-cyanobenzyl)-1-oxo-1,2,3,4-tetrahydropyrazino[1,2-a]indole-3-carboxamide (2f)**

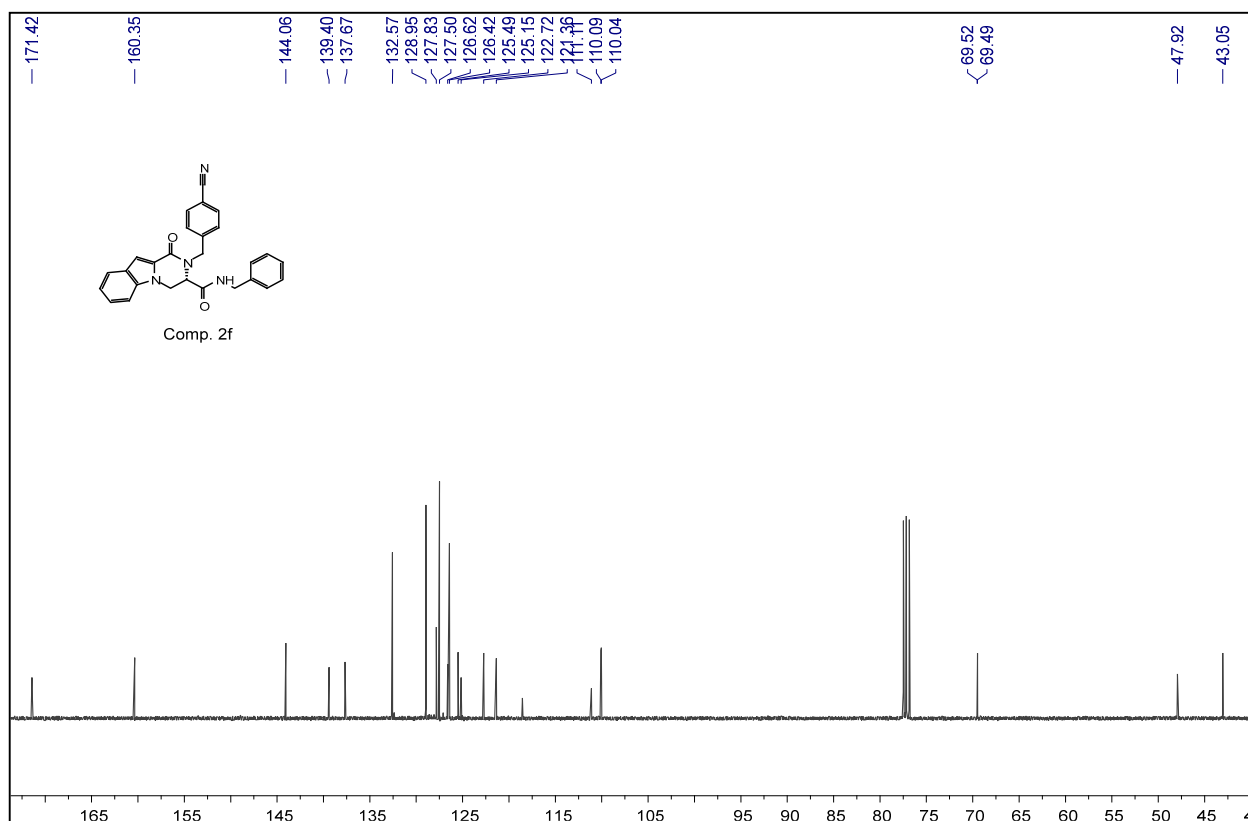

**<sup>1</sup>H NMR: (S)-N-Benzyl-2-(4-trifluoromethylbenzyl)-1-oxo-1,2,3,4-tetrahydropyrazino[1,2-a]indole-3-carboxamide (2g)**

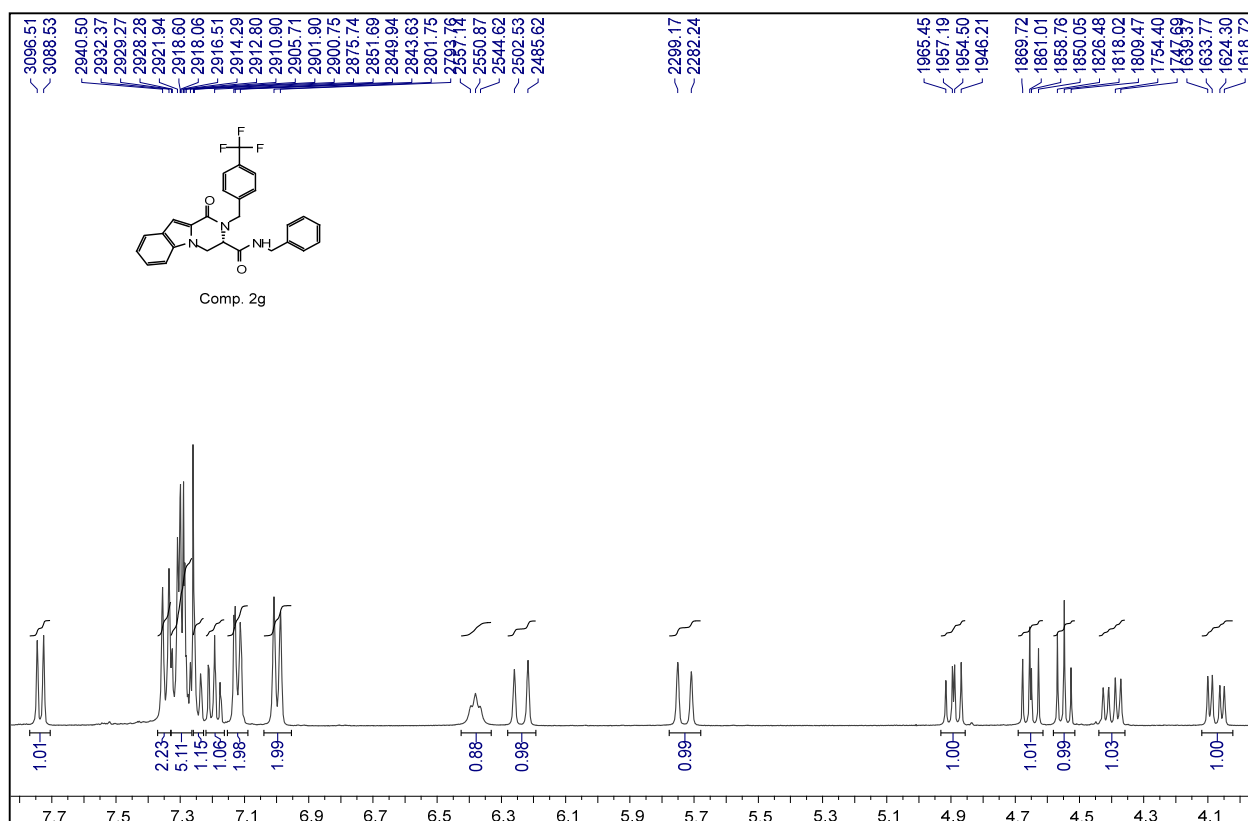

**<sup>13</sup>C NMR: (S)-N-Benzyl-2-(4-trifluoromethylbenzyl)-1-oxo-1,2,3,4-tetrahydropyrazino[1,2-a]indole-3-carboxamide (2g)**

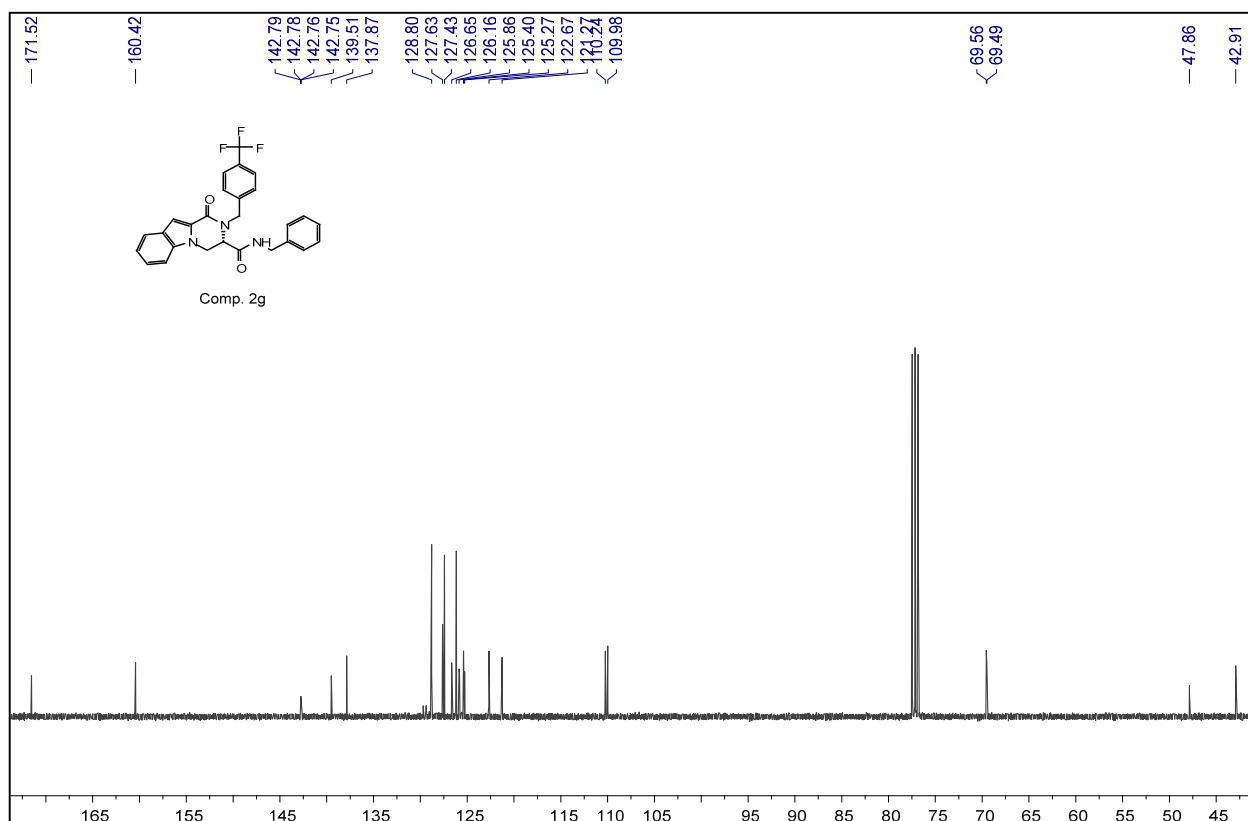

**<sup>1</sup>H NMR: (S)-N-Benzyl-2-(3-trifluoromethoxybenzyl)-1-oxo-1,2,3,4-tetrahydropyrazino[1,2-a]indole-3-carboxamide (2h)**

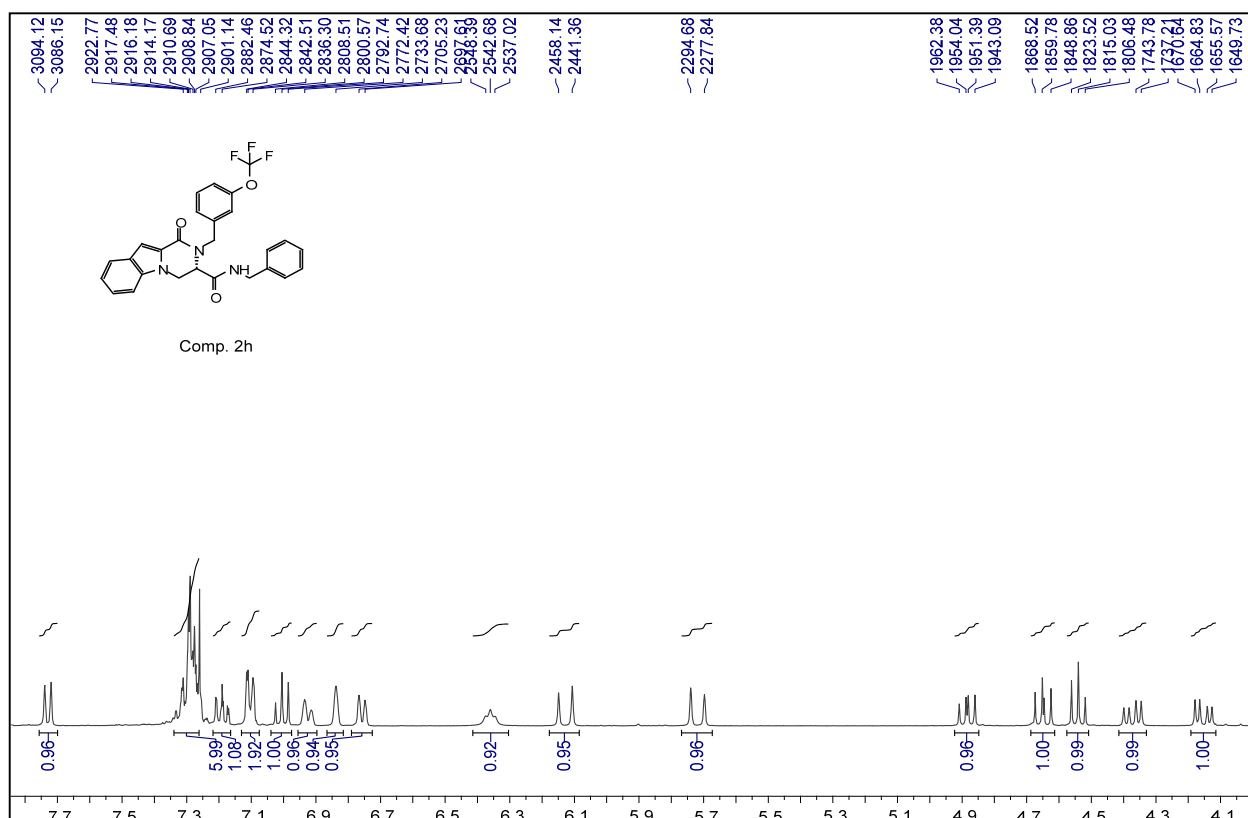

**<sup>13</sup>C NMR: (S)-N-Benzyl-2-(3-trifluoromethoxybenzyl)-1-oxo-1,2,3,4-tetrahydropyrazino[1,2-a]indole-3-carboxamide (2h)**

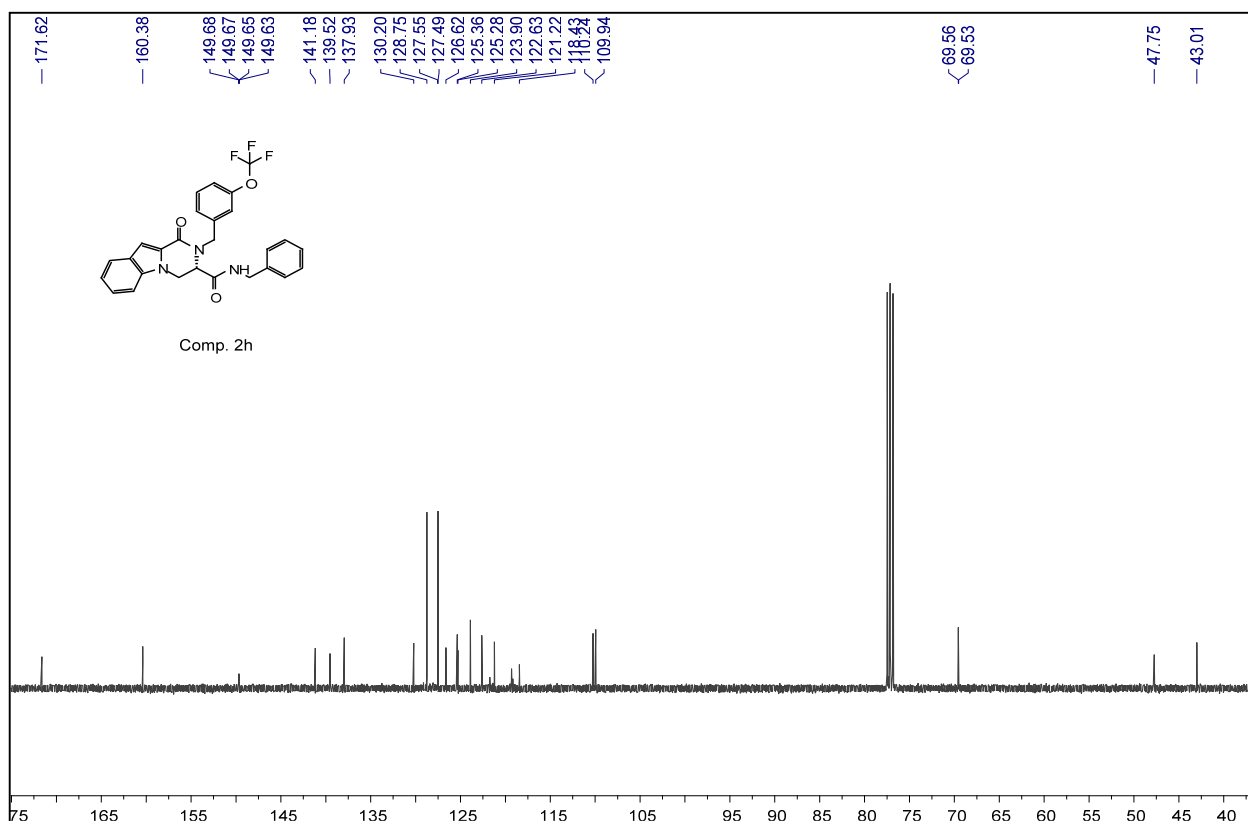

**<sup>1</sup>H NMR: (S)-N-Benzyl-2-(4-trifluoromethoxybenzyl)-1-oxo-1,2,3,4-tetrahydropyrazino[1,2-a]indole-3-carboxamide (2i)**

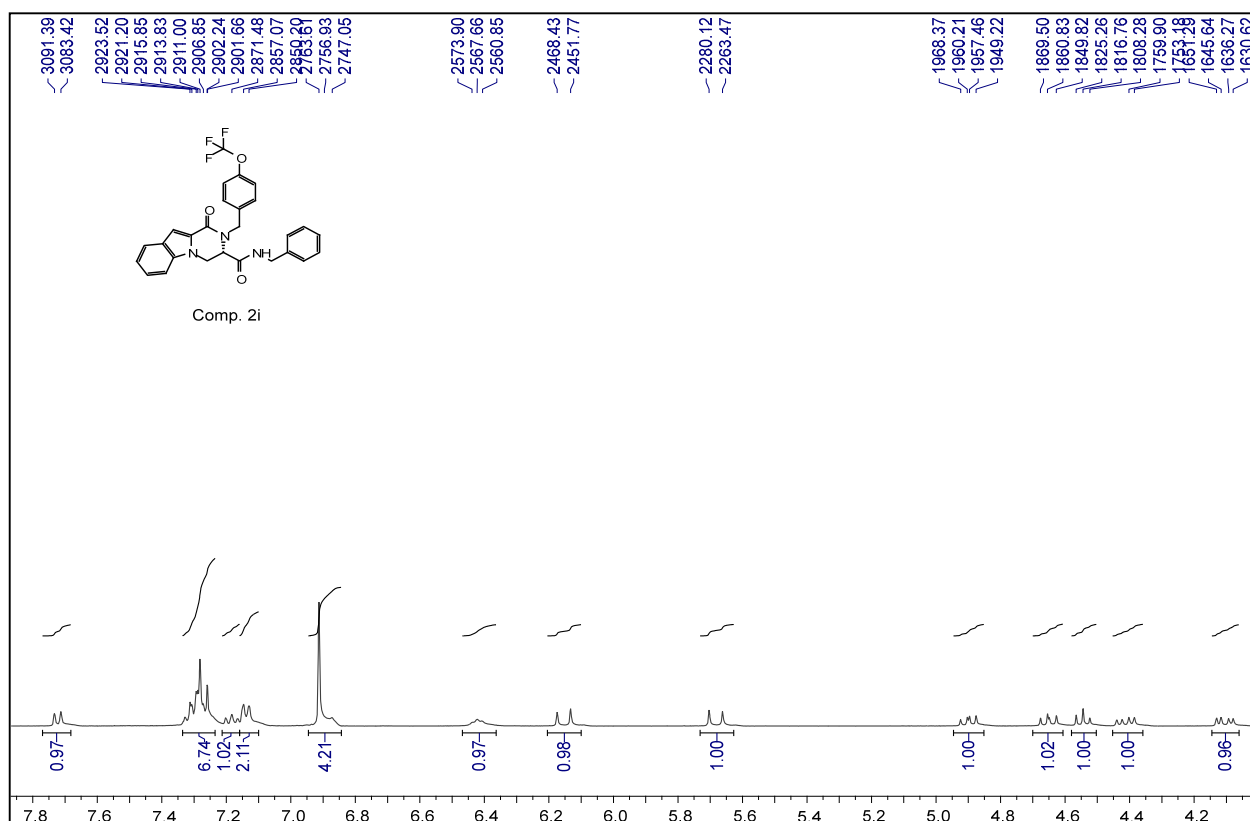

**<sup>13</sup>C NMR: (S)-N-Benzyl-2-(4-trifluoromethoxybenzyl)-1-oxo-1,2,3,4-tetrahydropyrazino[1,2-a]indole-3-carboxamide (2i)**

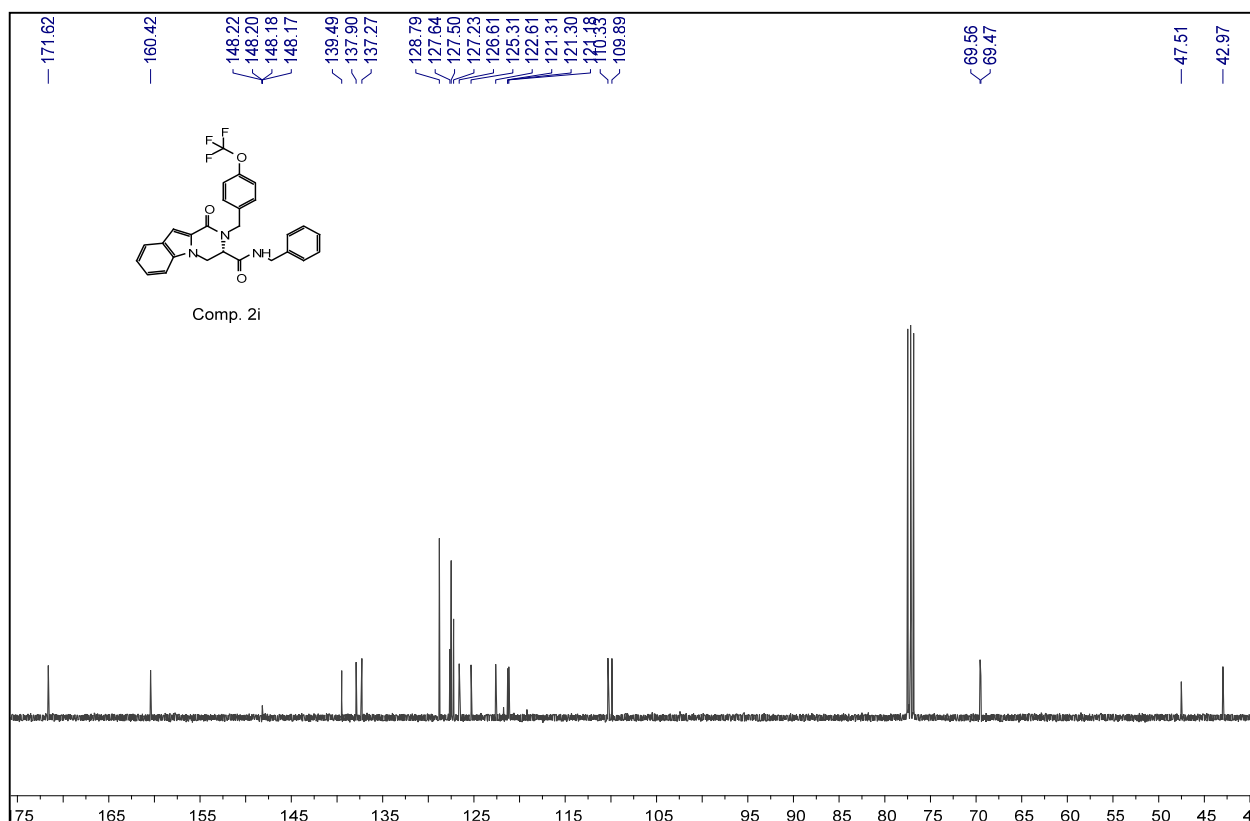

**<sup>1</sup>H NMR: (S)-N-Benzyl-2-(3-methylbenzyl)-1-oxo-1,2,3,4-tetrahydropyrazino[1,2-a]indole-3-carboxamide (2j)**

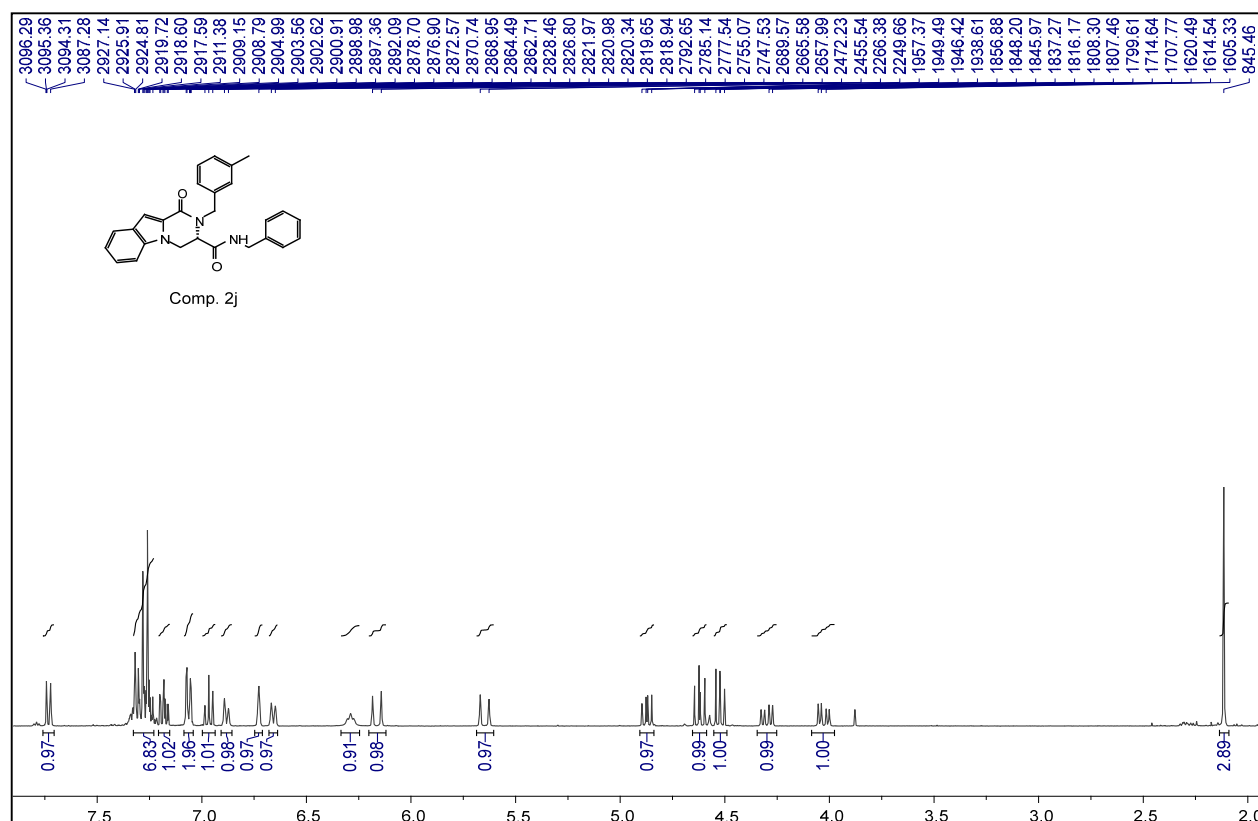

**<sup>13</sup>C NMR: (S)-N-Benzyl-2-(3-methylbenzyl)-1-oxo-1,2,3,4-tetrahydropyrazino[1,2-a]indole-3-carboxamide (2j)**

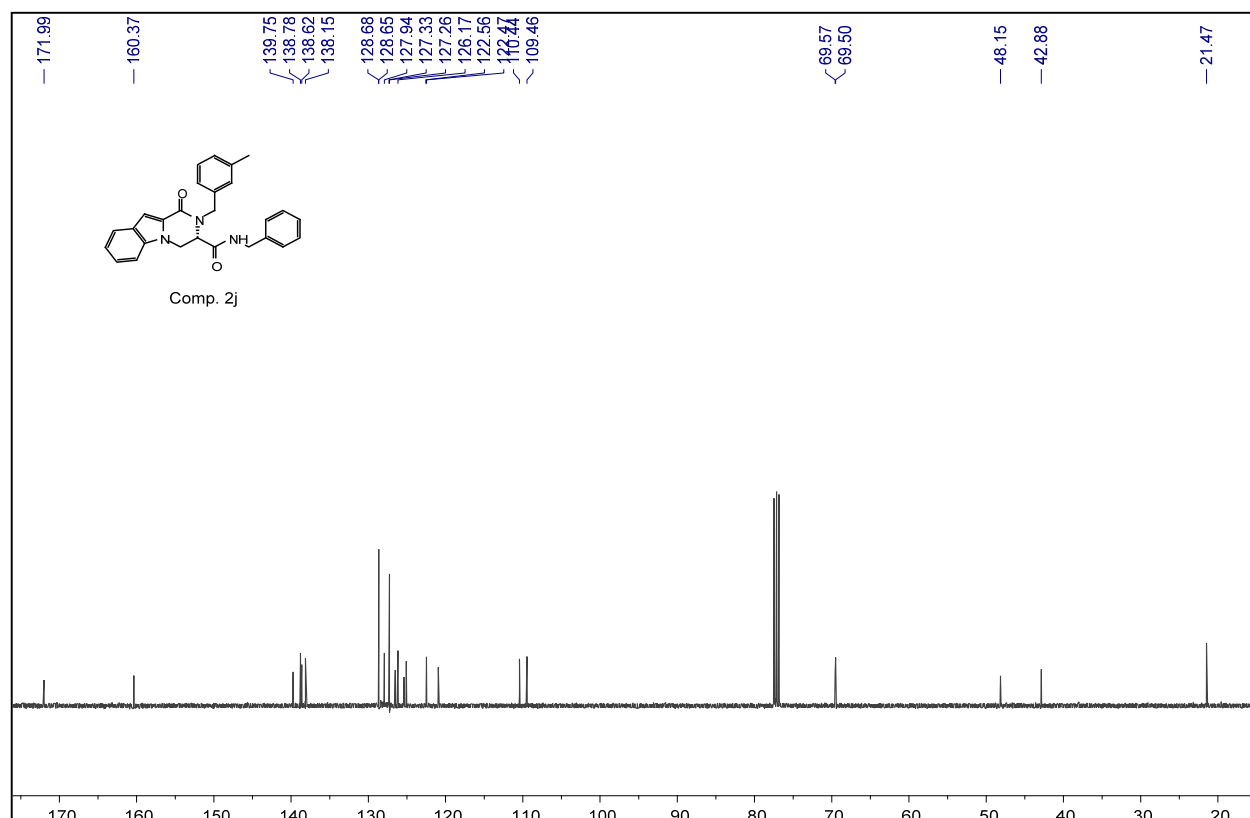

**<sup>1</sup>H NMR: (S)-N-Benzyl-2-(4-methylbenzyl)-1-oxo-1,2,3,4-tetrahydropyrazino[1,2-a]indole-3-carboxamide (2k)**

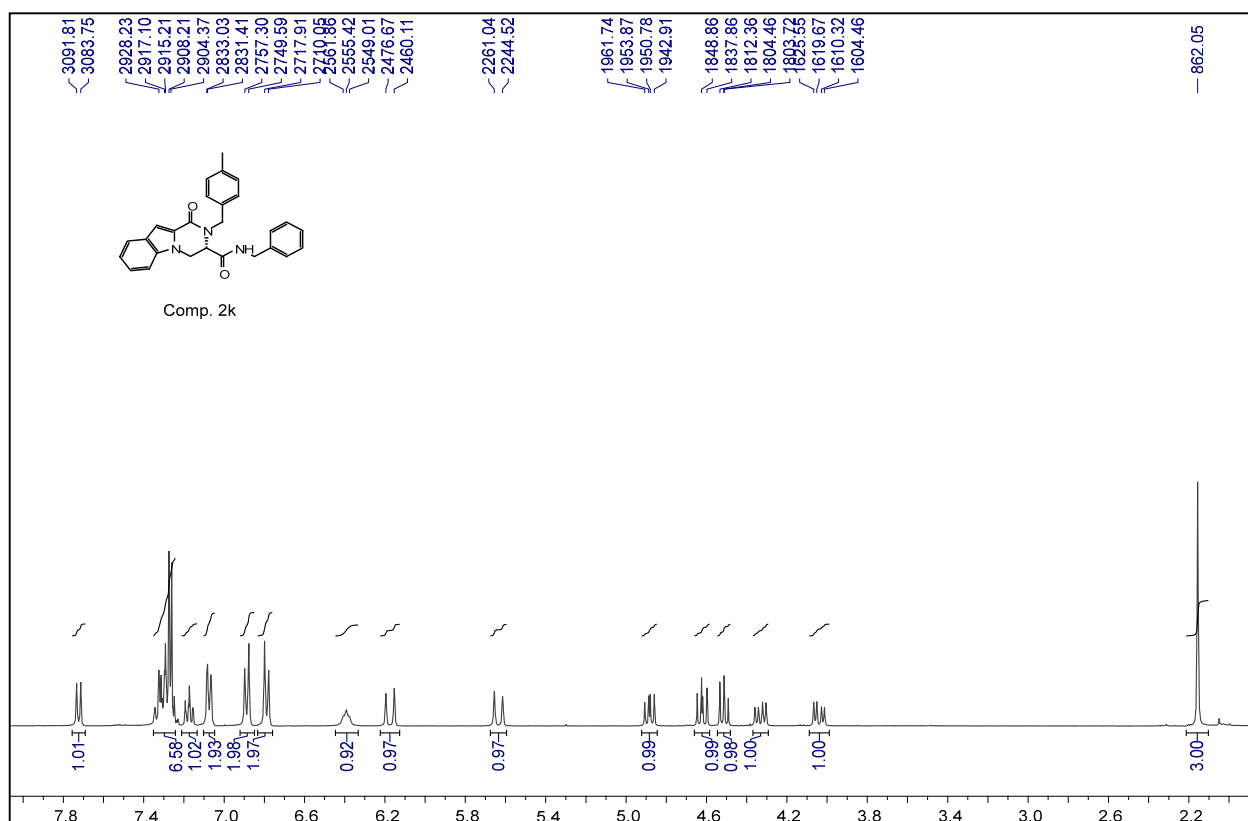

**<sup>13</sup>C NMR: (S)-N-Benzyl-2-(4-methylbenzyl)-1-oxo-1,2,3,4-tetrahydropyrazino[1,2-a]indole-3-carboxamide (2k)**

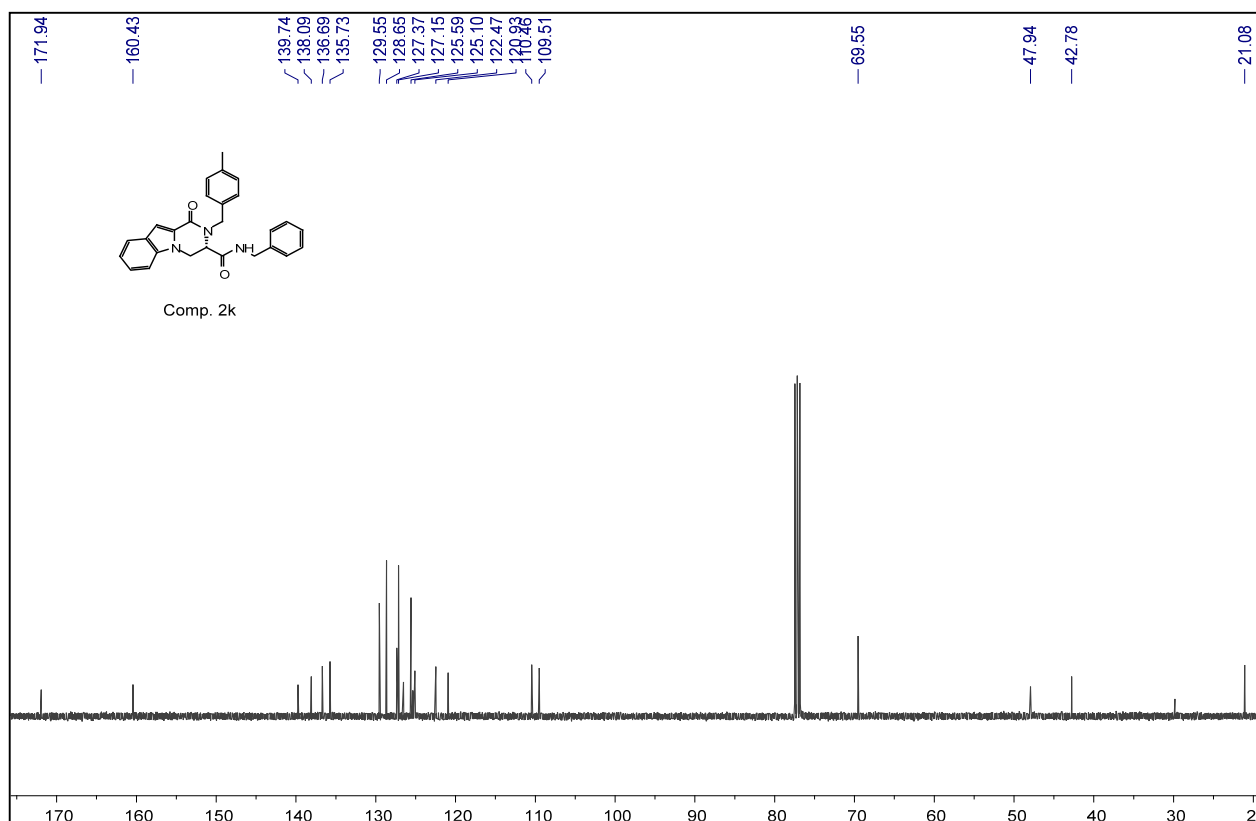

**<sup>1</sup>H NMR: (S)-N-Benzyl-2-(naphthalen-1-ylmethyl)-1-oxo-1,2,3,4-tetrahydropyrazino[1,2-a]indole-3-carboxamide (2l)**

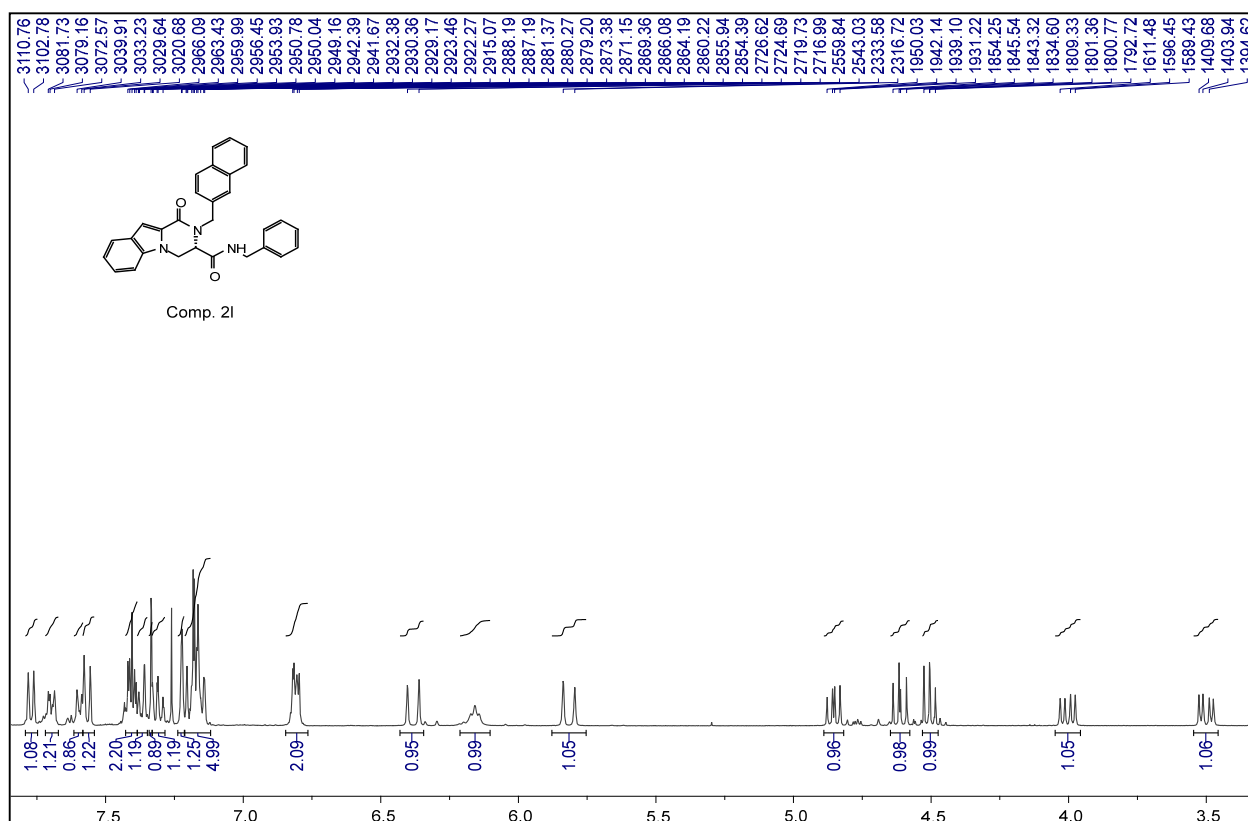

**<sup>13</sup>C NMR: (S)-N-Benzyl-2-(naphthalen-1-ylmethyl)-1-oxo-1,2,3,4-tetrahydropyrazino[1,2-a]indole-3-carboxamide (2l)**

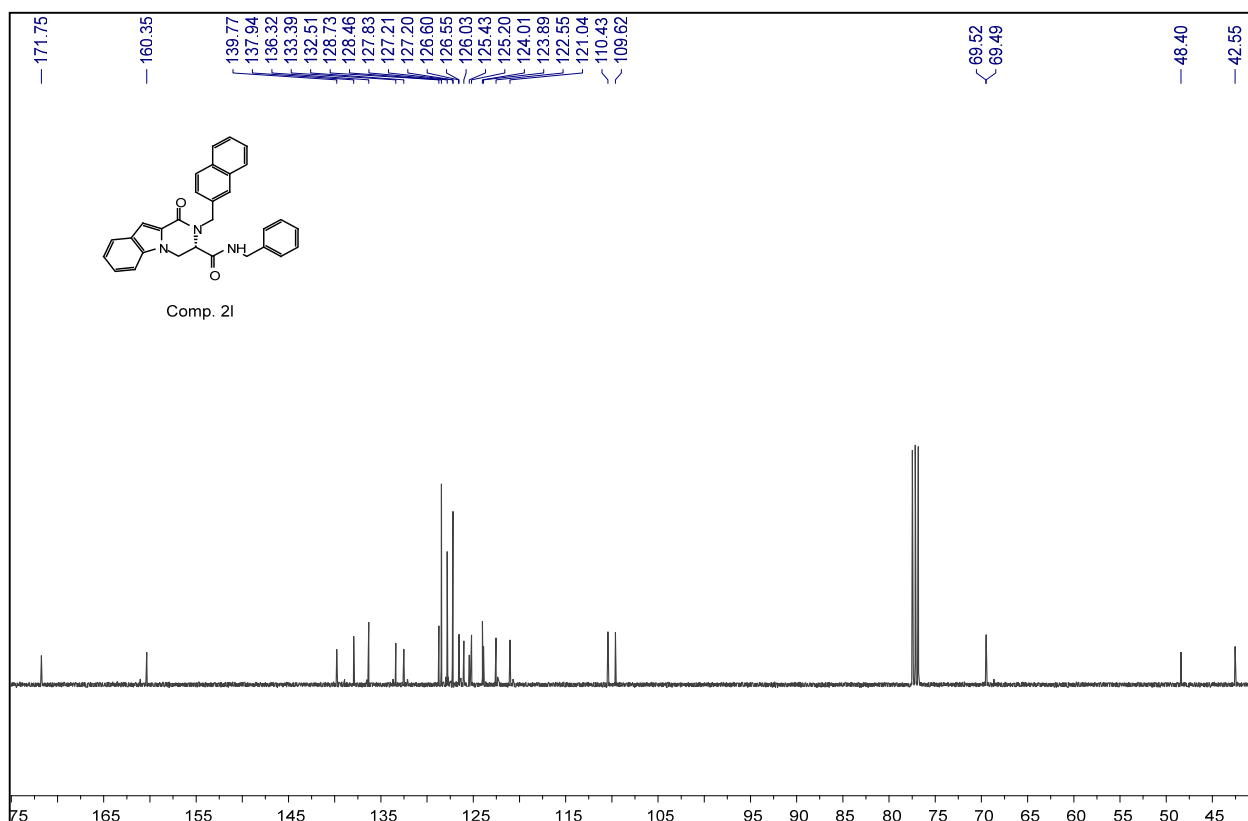

**<sup>1</sup>H NMR: (S)-N-Benzyl-2-([1,1'-biphenyl]-4-ylmethyl)-1-oxo-1,2,3,4-tetrahydropyrazino[1,2-a]indole-3-carboxamide (2m)**

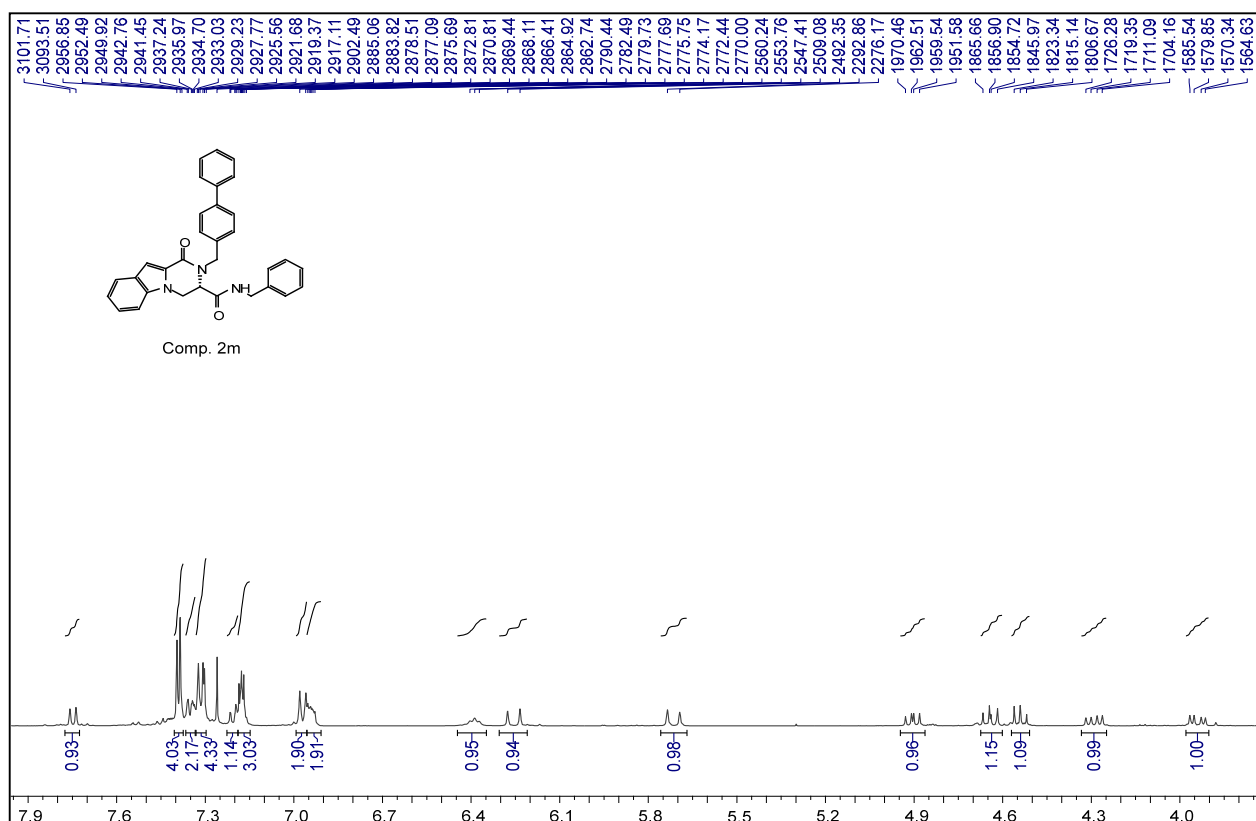

**<sup>13</sup>C NMR: (S)-N-Benzyl-2-([1,1'-biphenyl]-4-ylmethyl)-1-oxo-1,2,3,4-tetrahydropyrazino[1,2-a]indole-3-carboxamide (2m)**

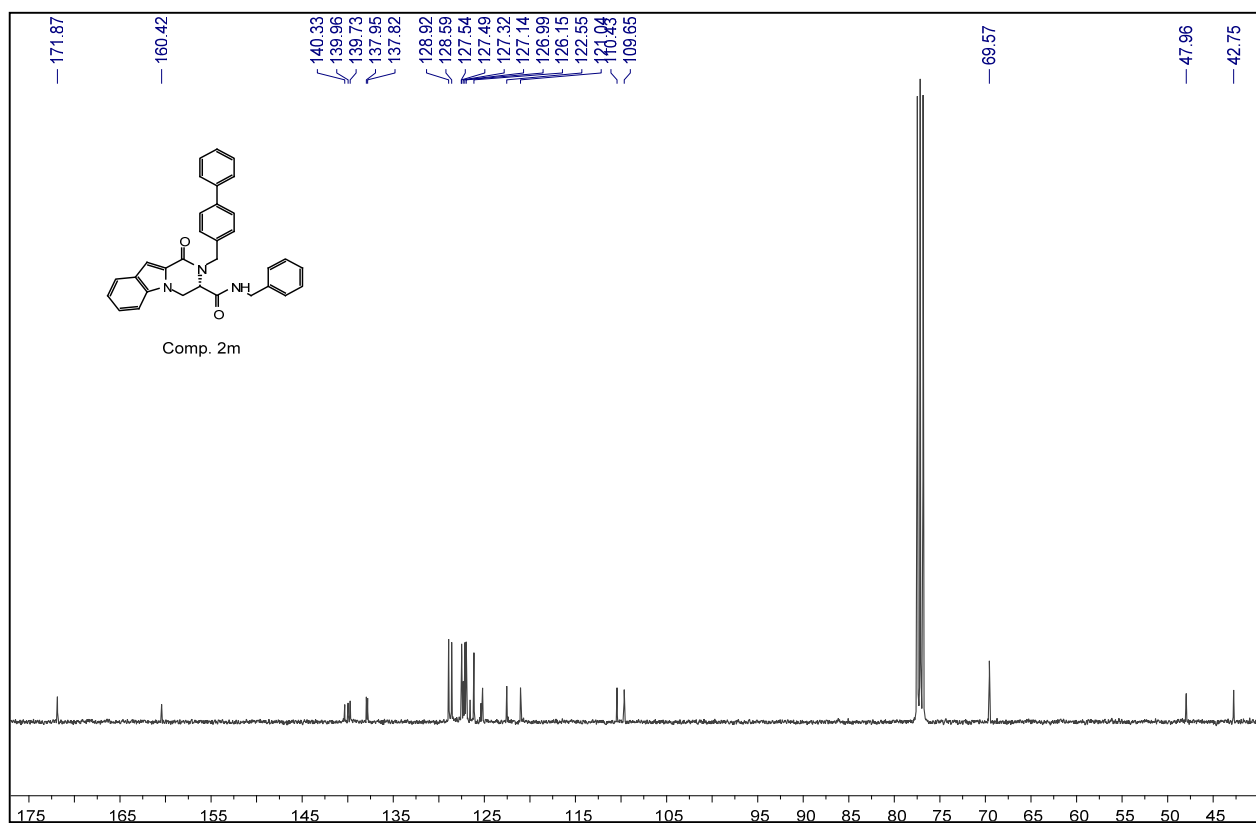

Supplement: s1 [file s1]
